# Supplementary material for: De novo assembly of the Indian blue peacock (Pavo cristatus) genome using Oxford Nanopore technology and Illumina sequencing
Source: PubMed Central journal article supplement (PMC6511069; doi:10.1093/gigascience/giz038), 2019-05-11

## De novo genome assembly of Indian Blue Peacock (*Pavo cristatus*) from Oxford Nanopore and Illumina sequencing reads --Manuscript Draft--

|                                                    |                                                                                                                                                                                                                                                                                                                                                                                                                                                                                                                                                                                                                                                                                                                                                                                                                                                                                                                                                                                                                                                                                                                                                                                                                                                                                                                                                                                                                                                                                                                                                                                                                                                                                                                                                                                                                                                                                                                                                                                                                                                                                                                                                                                                                                                                                                                                                                                                                                                                                                                                                                                                                                                                                                                                                                                                                                                                                                                                                                                                        |
|----------------------------------------------------|--------------------------------------------------------------------------------------------------------------------------------------------------------------------------------------------------------------------------------------------------------------------------------------------------------------------------------------------------------------------------------------------------------------------------------------------------------------------------------------------------------------------------------------------------------------------------------------------------------------------------------------------------------------------------------------------------------------------------------------------------------------------------------------------------------------------------------------------------------------------------------------------------------------------------------------------------------------------------------------------------------------------------------------------------------------------------------------------------------------------------------------------------------------------------------------------------------------------------------------------------------------------------------------------------------------------------------------------------------------------------------------------------------------------------------------------------------------------------------------------------------------------------------------------------------------------------------------------------------------------------------------------------------------------------------------------------------------------------------------------------------------------------------------------------------------------------------------------------------------------------------------------------------------------------------------------------------------------------------------------------------------------------------------------------------------------------------------------------------------------------------------------------------------------------------------------------------------------------------------------------------------------------------------------------------------------------------------------------------------------------------------------------------------------------------------------------------------------------------------------------------------------------------------------------------------------------------------------------------------------------------------------------------------------------------------------------------------------------------------------------------------------------------------------------------------------------------------------------------------------------------------------------------------------------------------------------------------------------------------------------------|
| <b>Manuscript Number:</b>                          | GIGA-D-18-00280                                                                                                                                                                                                                                                                                                                                                                                                                                                                                                                                                                                                                                                                                                                                                                                                                                                                                                                                                                                                                                                                                                                                                                                                                                                                                                                                                                                                                                                                                                                                                                                                                                                                                                                                                                                                                                                                                                                                                                                                                                                                                                                                                                                                                                                                                                                                                                                                                                                                                                                                                                                                                                                                                                                                                                                                                                                                                                                                                                                        |
| <b>Full Title:</b>                                 | De novo genome assembly of Indian Blue Peacock ( <i>Pavo cristatus</i> ) from Oxford Nanopore and Illumina sequencing reads                                                                                                                                                                                                                                                                                                                                                                                                                                                                                                                                                                                                                                                                                                                                                                                                                                                                                                                                                                                                                                                                                                                                                                                                                                                                                                                                                                                                                                                                                                                                                                                                                                                                                                                                                                                                                                                                                                                                                                                                                                                                                                                                                                                                                                                                                                                                                                                                                                                                                                                                                                                                                                                                                                                                                                                                                                                                            |
| <b>Article Type:</b>                               | Data Note                                                                                                                                                                                                                                                                                                                                                                                                                                                                                                                                                                                                                                                                                                                                                                                                                                                                                                                                                                                                                                                                                                                                                                                                                                                                                                                                                                                                                                                                                                                                                                                                                                                                                                                                                                                                                                                                                                                                                                                                                                                                                                                                                                                                                                                                                                                                                                                                                                                                                                                                                                                                                                                                                                                                                                                                                                                                                                                                                                                              |
| <b>Funding Information:</b>                        |                                                                                                                                                                                                                                                                                                                                                                                                                                                                                                                                                                                                                                                                                                                                                                                                                                                                                                                                                                                                                                                                                                                                                                                                                                                                                                                                                                                                                                                                                                                                                                                                                                                                                                                                                                                                                                                                                                                                                                                                                                                                                                                                                                                                                                                                                                                                                                                                                                                                                                                                                                                                                                                                                                                                                                                                                                                                                                                                                                                                        |
| <b>Abstract:</b>                                   | <p><b>Background</b></p> <p><i>Pavo cristatus</i> the Indian blue peacock are geographically found distributed in natural habitats of South Asia. Peacock has been described among the bird species as one of the most elegant, majestic and beautiful bird (Fig. 1). Since prehistoric times they have been described or depicted in Indian culture and has been adopted as the national bird of India. Its length varies from 92-125 centimeter (without train), weighing about 4-8 Kilograms and lives up to 20 years in the wild. The avian species have been very important in the fields of phylogenetics, developmental studies, sexual reproduction and speciation. Avian genomics have contributed immensely towards understanding the vertebrate genome evolution. Here we present the first draft genome sequence of <i>P. cristatus</i>, yet another important bird species to further add values and gain insight into avian genomics.</p> <p><b>Findings</b></p> <p>For the first time in avian genomics, long reads using Oxford Nanopore technology have been used for the whole genome assembly. We sequenced different DNA insert size libraries from Illumina and long read Nanopore technologies from the peacock DNA. We performed de novo genome assembly by integrating the reads from Illumina short insert, long insert, multiple mate-pair reads along with Nanopore long reads using multiple genome improvement tools. A draft of the peacock genome of about 0.915 Gigabases (Gb) with a N50 of 0.23 Megabases (Mb) was assembled. Annotations with other avian species, protein families, KEGG were performed for functional understanding by in-silico approaches. Proteins were compared against Chicken, Turkey and Human to obtain evolutionary similarities and uniqueness of the <i>Pavo</i> species.</p> <p><b>Conclusions</b></p> <p>Our most important findings from the genome sequence of <i>P. cristatus</i> is to decipher the different gene families and to understand their role in body pattern development and other features that truly makes this bird unique. The genome sequence also gives insights on its genetic lineage and evolution with relation to other avian members. Several hypothesis and theories have been discussed with respect to sexual selection; now with the understanding of the genome sequence, some of these evolutionary theories will be better understood. The genome will also support future studies on population genetics and breeding for species conservation as well as in understanding its evolutionary ecology and sexual dimorphism. The comparative genomics with other avian species and specifically with <i>Gallus gallus</i> (Chicken) and <i>Meleagris gallopavo</i> (Turkey) have shown insights into the gene families and their conserved domains. <i>Pavo</i> proteins were also compared with human to understand the functional components that were conserved after the speciation split.</p> |
| <b>Corresponding Author:</b>                       | Subhradip Karmakar, PhD<br>All India Institute of Medical Sciences<br>New Delhi, Delhi INDIA                                                                                                                                                                                                                                                                                                                                                                                                                                                                                                                                                                                                                                                                                                                                                                                                                                                                                                                                                                                                                                                                                                                                                                                                                                                                                                                                                                                                                                                                                                                                                                                                                                                                                                                                                                                                                                                                                                                                                                                                                                                                                                                                                                                                                                                                                                                                                                                                                                                                                                                                                                                                                                                                                                                                                                                                                                                                                                           |
| <b>Corresponding Author Secondary Information:</b> |                                                                                                                                                                                                                                                                                                                                                                                                                                                                                                                                                                                                                                                                                                                                                                                                                                                                                                                                                                                                                                                                                                                                                                                                                                                                                                                                                                                                                                                                                                                                                                                                                                                                                                                                                                                                                                                                                                                                                                                                                                                                                                                                                                                                                                                                                                                                                                                                                                                                                                                                                                                                                                                                                                                                                                                                                                                                                                                                                                                                        |

|                                                                                                                                                                                                                                                                                                  |                                         |
|--------------------------------------------------------------------------------------------------------------------------------------------------------------------------------------------------------------------------------------------------------------------------------------------------|-----------------------------------------|
| <b>Corresponding Author's Institution:</b>                                                                                                                                                                                                                                                       | All India Institute of Medical Sciences |
| <b>Corresponding Author's Secondary Institution:</b>                                                                                                                                                                                                                                             |                                         |
| <b>First Author:</b>                                                                                                                                                                                                                                                                             | Subhradip Karmakar, PhD                 |
| <b>First Author Secondary Information:</b>                                                                                                                                                                                                                                                       |                                         |
| <b>Order of Authors:</b>                                                                                                                                                                                                                                                                         | Subhradip Karmakar, PhD                 |
|                                                                                                                                                                                                                                                                                                  | Ruby Dhar                               |
|                                                                                                                                                                                                                                                                                                  | Ashikh Seethy                           |
|                                                                                                                                                                                                                                                                                                  | Karthikeyan Pethusamy                   |
|                                                                                                                                                                                                                                                                                                  | Vishwajeet Rohil                        |
|                                                                                                                                                                                                                                                                                                  | Sunil Singh                             |
|                                                                                                                                                                                                                                                                                                  | Kakali Purkayastha                      |
|                                                                                                                                                                                                                                                                                                  | Sandeep Goswami                         |
|                                                                                                                                                                                                                                                                                                  | Rakesh Singh                            |
|                                                                                                                                                                                                                                                                                                  | Indrani Mukherjee                       |
|                                                                                                                                                                                                                                                                                                  | Ankita Raj                              |
|                                                                                                                                                                                                                                                                                                  | Tryambak Srivastava                     |
|                                                                                                                                                                                                                                                                                                  | Sovon Acharya                           |
|                                                                                                                                                                                                                                                                                                  | Balaji Rajashekhar                      |
| <b>Order of Authors Secondary Information:</b>                                                                                                                                                                                                                                                   |                                         |
| <b>Additional Information:</b>                                                                                                                                                                                                                                                                   |                                         |
| <b>Question</b>                                                                                                                                                                                                                                                                                  | <b>Response</b>                         |
| Are you submitting this manuscript to a special series or article collection?                                                                                                                                                                                                                    | No                                      |
| <b>Experimental design and statistics</b>                                                                                                                                                                                                                                                        | Yes                                     |
| Full details of the experimental design and statistical methods used should be given in the Methods section, as detailed in our <a href="#">Minimum Standards Reporting Checklist</a> . Information essential to interpreting the data presented should be made available in the figure legends. |                                         |
| Have you included all the information requested in your manuscript?                                                                                                                                                                                                                              |                                         |
| <b>Resources</b>                                                                                                                                                                                                                                                                                 | Yes                                     |
| A description of all resources used, including antibodies, cell lines, animals                                                                                                                                                                                                                   |                                         |

|                                                                                                                                                                                                                                                                                                                                                                                                                                                                                                                                                         |            |
|---------------------------------------------------------------------------------------------------------------------------------------------------------------------------------------------------------------------------------------------------------------------------------------------------------------------------------------------------------------------------------------------------------------------------------------------------------------------------------------------------------------------------------------------------------|------------|
| <p>and software tools, with enough information to allow them to be uniquely identified, should be included in the Methods section. Authors are strongly encouraged to cite <a href="#">Research Resource Identifiers</a> (RRIDs) for antibodies, model organisms and tools, where possible.</p> <p>Have you included the information requested as detailed in our <a href="#">Minimum Standards Reporting Checklist</a>?</p>                                                                                                                            |            |
| <p><b>Availability of data and materials</b></p> <p>All datasets and code on which the conclusions of the paper rely must be either included in your submission or deposited in <a href="#">publicly available repositories</a> (where available and ethically appropriate), referencing such data using a unique identifier in the references and in the “Availability of Data and Materials” section of your manuscript.</p> <p>Have you have met the above requirement as detailed in our <a href="#">Minimum Standards Reporting Checklist</a>?</p> | <p>Yes</p> |

1 ***De novo* genome assembly of Indian Blue Peacock (*Pavo***  
2 ***cristatus*), from Oxford Nanopore and Illumina sequencing**  
3 **reads**

4  
5  
6 **Authors:** Ruby Dhar<sup>1</sup>, Ashikh Seethy<sup>1</sup>, Karthikeyan Pethusamy<sup>1</sup>, Vishwajeet Rohil<sup>2</sup>, Sunil  
7 Singh<sup>1</sup>, Kakali Purkayastha<sup>2</sup>, Sandeep Goswami<sup>1</sup>, Rakesh Singh<sup>3</sup>, Indrani Mukherjee<sup>1</sup>, Ankita  
8 Raj<sup>1</sup>, Tryambak Srivastava<sup>1</sup>, Sovon Acharya<sup>1</sup>, Balaji Rajashekhar<sup>4,\*</sup> and Subhradip  
9 Karmakar<sup>1,\*</sup>

10  
11 **Affiliation:** <sup>1</sup>Department of Biochemistry, AIIMS, New Delhi, India. <sup>2</sup> Vallabhbhai Patel Chest  
12 Institute (VPCI), New Delhi, India. <sup>3</sup>Kanpur Zoo, Kanpur, India. <sup>4</sup> Institute of Computer  
13 Science, University of Tartu, 50409 Tartu, Estonia.

14  
15 **\*Corresponding Authors email:** subhradip.k@aiims.edu, balaji@ut.ee

16  
17  
18  
19 **Running Title:** De novo Genome Assembly of the Peacock Bird

20  
21  
22 **Key words:** Peacock, *Pavo cristatus*, Indian National Bird, Genome Assembly, Oxford  
23 Nanopore.

24 **Abstract**

## 25 **Background**

1  
2 26 *Pavo cristatus* the Indian blue peacock are geographically found distributed in natural  
3  
4  
5 27 habitats of South Asia. Peacock has been described among the bird species as one of the most  
6  
7 28 elegant, majestic and beautiful bird (Fig. 1). Since prehistoric times they have been described  
8  
9  
10 29 or depicted in Indian culture and has been adopted as the national bird of India. Its length  
11  
12 30 varies from 92-125 centimeter (without train), weighing about 4-8 Kilograms and lives up to  
13  
14 31 20 years in the wild. The avian species have been very important in the fields of  
15  
16  
17 32 phylogenetics, developmental studies, sexual reproduction and speciation. Avian genomics  
18  
19 33 have contributed immensely towards understanding the vertebrate genome evolution. Here  
20  
21  
22 34 we present the first draft genome sequence of *P. cristatus*, yet another important bird species  
23  
24 35 to further add values and gain insight into avian genomics.  
25  
26  
27 36

## 28 29 37 **Findings**

30  
31 38 For the first time in avian genomics, long reads using Oxford Nanopore technology have  
32  
33  
34 39 been used for the whole genome assembly. We sequenced different DNA insert size libraries  
35  
36 40 from Illumina and long read Nanopore technologies from the peacock DNA. We performed  
37  
38  
39 41 *de novo* genome assembly by integrating the reads from Illumina short insert, long insert,  
40  
41 42 multiple mate-pair reads along with Nanopore long reads using multiple genome  
42  
43  
44 43 improvement tools. A draft of the peacock genome of about 0.915 Gigabases (Gb) with a  
45  
46 44 N50 of 0.23 Megabases (Mb) was assembled. Annotations with other avian species, protein  
47  
48  
49 45 families, KEGG were performed for functional understanding by insilico approaches.  
50  
51 46 Proteins were compared against Chicken, Turkey and Human to obtain evolutionary  
52  
53  
54 47 similarities and uniqueness of the *Pavo* species.  
55  
56 48

## 57 58 49 **Conclusions**

1  
2  
3  
4  
5  
6  
7  
8  
9  
10  
11  
12  
13  
14  
15  
16  
17  
18  
19  
20  
21  
22  
23  
24  
25  
26  
27  
28  
29  
30  
31  
32  
33  
34  
35  
36  
37  
38  
39  
40  
41  
42  
43  
44  
45  
46  
47  
48  
49  
50  
51  
52  
53  
54  
55  
56  
57  
58  
59  
60  
61  
62

Our most important findings from the genome sequence of *P. cristatus* is to decipher the different gene families and to understand their role in body pattern development and other features that truly makes this bird unique. The genome sequence also gives insights on its genetic lineage and evolution with relation to other avian members. Several hypothesis and theories have been discussed with respect to sexual selection; now with the understanding of the genome sequence, some of these evolutionary theories will be better understood. The genome will also support future studies on population genetics and breeding for species conservation as well as in understanding its evolutionary ecology and sexual dimorphism. The comparative genomics with other avian species and specifically with *Gallus gallus* (Chicken) and *Meleagris gallopavo* (Turkey) have shown insights into the gene families and their conserved domains. *Pavo* proteins were also compared with human to understand the functional components that were conserved after the speciation split.

63 **Introduction**

64 *Pavo cristatus* commonly known as the blue Indian peacock obtained the status of National  
65 Bird of India in 1963. Peacocks have been distributed widely in Asian countries. The bird is  
66 very popular as it symbolizes beauty, love, grace and pride (Gadagkar, R; Kushwaha, et al.).  
67 It has been referred in ancient literatures of India and has been found closely associated with  
68 the life and culture of the peoples from South East Asia and particularly India (Kadgaonkar,  
69 SB). Peacocks are native to South Asia but have been introduced into many other countries  
70 usually as exhibits in park, zoos and also large number of aviculturists raise and breed these  
71 species as pets (Brickle, N; Jackson, C).

72  
73 International Chicken Genome Sequencing Consortium sequenced the *Gallus gallus* genome  
74 in 2004, and this laid the foundation for study of avian genomics. A decade later, the avian  
75 genome consortium assembled 48 genomes of wide variety of avian species to understand the  
76 evolutionary relationships of modern birds (Zhang, G., et al.). Raw sequencing data for each  
77 species were generated at from coverage of 6X for zebra finch to a maximum 160X for  
78 budgerigar. The genome size varied from 1.04 to 1.26 Gb (<http://avian.genomics.cn/en/>). The  
79 studies on different bird species have provided a new perspective on vertebrate genome  
80 evolution. These genomes have also helped in improving the annotation of mammalian  
81 genomes. There are several distinguishing as well as unique features between chicken and  
82 human genome including genome size which is of one third of humans, conserved synteny  
83 blocks complete absence of active short interspersed nucleotide elements (SINE) to mention  
84 a few (International Chicken Genome sequencing consortium).

85  
86 Despite the wealth of information from avian genomes sequencing projects, it is very  
87 important to genome sequence other new species to add value into aves and vertebrate

1 88 genomics. For the first time in bird genomics, Oxford Nanopore technology has been used to  
2 89 sequence a bird genome in this present study. The long read chemistry will help in better  
3  
4 90 genome assembly of the TEs and repeat rich. The peacock genome will aid in understanding  
5  
6  
7 91 about the uniqueness of this birds genome in comparison to other bird species. Comparative  
8  
9  
10 92 genomes will help in understanding the development of this species, sexual selection and its  
11  
12 93 evolutionary relationships with other birds. The characterization of the genes involved in sex  
13  
14 94 determination could provide relevant information for the selective breeding of the peafowl  
15  
16 95 populations. We have unraveled some of the genomic signatures and thus have reported  
17  
18  
19 96 unique gene pools of this bird by performing comparative genomics. Further different data  
20  
21  
22 97 types will improve the assembly and gene/genome characterization will help to address the  
23  
24 98 sexual selection theory and key answers relevant to the evolution of this bird.  
25  
26  
27 99  
28  
29 100

## 31 101 **Materials and methods**

### 34 102 **Sample collection and extraction of DNA**

36 103 The whole blood of male peacock was collected from Kanpur zoo, India after obtaining the  
37  
38  
39 104 necessary ethical and institutional approval. 20µl of Proteinase K (PK) solution was taken  
40  
41 105 into a 1.5ml micro centrifuge tube. 200µl of blood was added and briefly mixed. 200µl of cell  
42  
43  
44 106 lysis buffer was added to the tube, mixed by vortexing for 10seconds; incubated at 56°C for  
45  
46 107 10minutes. ReliaPrep™ Binding Column was placed into an empty collection tube. 250µl of  
47  
48  
49 108 Binding Buffer (BBA) was added, capped the tube, and mixed by vortexing for 10 seconds  
50  
51 109 with a vortex mixer. Contents of the tube were added to the ReliaPrep™ binding column,  
52  
53  
54 110 capped and placed in a refrigerated micro centrifuge. These were then centrifuged for 1  
55  
56 111 minute at maximum speed and flow through was discarded. Binding column was placed into  
57  
58  
59 112 a fresh collection tube. 500µl of column wash solution was added to the column and  
60  
61  
62  
63  
64  
65



113 centrifuged for 3 minutes at maximum speed; Flow through was again discarded. Column  
114 washing is repeated thrice. Columns were then placed in a nuclease free clean 1.5ml micro  
115 centrifuge tube. 100 µl of Nuclease-Free Water was then added to the column and  
116 centrifuged for an additional 1 minute at maximum speed. Column was discarded and the  
117 elute was saved. The concentration and purity of the extracted DNA was evaluated using  
118 Nanodrop Spectrophotometer (Thermo Scientific) and Qubit flurometer and integrity was  
119 checked on a 0.8% agarose gel. The DNA sample was aliquoted for library preparation on  
120 two different platforms: Illumina HiSeq4000 and Oxford Nanopore Technologies (ONT).

121

### 122 **HiSeq Paired-End library preparation and sequencing**

123 Whole genome sequencing (WGS) libraries were prepared with Illumina-compatible  
124 NEXTflex DNA sequencing kit (BIOO Scientific, Austin, Texas, U.S.A.). Briefly, approx. 1  
125 µg of genomic DNA was sheared using Covaris S2 sonicator (Covaris, Woburn,  
126 Massachusetts, USA) to generate approx. fragment size distribution from 300 to 600 basepair  
127 (bp). The fragment size distribution was checked on Agilent 2200 Tape Station with D1000  
128 DNA screen tapes and reagents (Agilent Technologies, Palo Alto, CA, USA) and  
129 subsequently purified using HighPrep magnetic beads (Magbio Genomics Inc, USA). The  
130 purified fragments were end-repaired, adenylated and ligated to Illumina multiplex barcode  
131 adaptors as per NEXTflex DNA sequencing kit protocol (BIOO Scientific, Austin, Texas,  
132 USA).

133

134 The adapter-ligated DNA was purified with HighPrep beads (MagBio Genomics, Inc,  
135 Gaithersburg, Maryland, USA) and then size selected on 2% low melting agarose gel and  
136 cleaned using MinElute column (QIAGEN). The resultant fragments were amplified for 10  
137 cycles of PCR using Illumina-compatible primers provided in the NEXTFlex DNA

138 sequencing kit. The final PCR product (sequencing library) was purified with HighPrep  
139 beads, followed by library quality control check. The Illumina-compatible sequencing library  
140 was initially quantified by Qubit fluorometer (Thermo Fisher Scientific, MA, USA) and its  
141 fragment size distribution was analyzed on Agilent TapeStation. Finally, the sequencing  
142 library was accurately quantified by quantitative PCR using Kapa Library Quantification Kit  
143 (Kapa Biosystems, Wilmington, MA, USA). The qPCR-quantified library was subjected to  
144 sequencing on an Illumina sequencer for 150 bp paired-end chemistry.

146 The Illumina-compatible sequencing library for the samples has a fragment size range  
147 between 275 to 425 bp for Paired-End Short Insert (PE-SI) and 350 bp to 650bp for Paired-  
148 End Long Insert (PE-LI). As the combined adapter size is approximately 120bp, the effective  
149 user-defined insert size is 155 to 305 bp and 230 to 530 bp for PE-SI and PE-LI respectively.  
150 Libraries were sequencing in Illumina HiSeq platform with 150\*2 chemistry. The short reads  
151 of Paired-End Short Insert (PE-SI), Paired-End Long Insert (PE-LI) and Mate-Pair (MP) from  
152 Illumina HiSeq platform.

#### 155 **Mate-Pair library preparation and sequencing**

156 Mate Pair sequencing library was prepared with Illumina-compatible Nextera Mate Pair  
157 Sample Preparation Kit (Illumina Inc., Austin, TX, U.S.A.). Briefly, approx. 4 ug of genomic  
158 DNA was simultaneously fragmented and tagged with Mate Pair adapters in a Transposon  
159 based Tagmentation step. Tagmented DNA was then purified using AMPure XP Magnetic  
160 beads (Beckman Coulter Life Sciences, Indianapolis, IN, U.S.A.) followed by Strand  
161 Displacement to fill gaps in the Tagmented DNA. Strand displaced DNA was further purified  
162 with AMPure XP beads before size-selecting the 3-5 Kilobases (Kb), 5-7 Kb & 7-10 Kb

163 fragments on low melting agarose gel. The fragments were circularized in an overnight blunt-  
164 end intra-molecular ligation step, which will result in circularization of DNA with the insert  
165 flanked mate pair adapter junction.

166

167 The circularized DNA was sheared using Covaris S220 sonicator (Covaris, Woburn,  
168 Massachusetts, USA) to generate approx. fragment size distribution from 300 bp to 1000 bp.

169 The sheared DNA was purified to collect the Mate pair junction positive fragments using  
170 Dynabeads M-280 Streptavidin Magnetic beads (Thermo Fisher Scientific, Waltham, MA,  
171 U.S.A.). The purified fragments were end-repaired, adenylated and ligated to Illumina  
172 multiplex barcode adaptors as per Nextera Mate Pair Sample Preparation Kit protocol.

173

174 The adapter-ligated DNA was then amplified for 15 cycles of PCR using Illumina-compatible  
175 primers. The final PCR product (sequencing library) was purified with AMPure XP beads,  
176 followed by library quality control check. The Illumina compatible sequencing library was  
177 initially quantified by Qubit fluorometer (Thermo Fisher Scientific, MA, USA) and its  
178 fragment size distribution was analyzed on Agilent TapeStation. Finally, the sequencing  
179 library was accurately quantified by quantitative PCR using Kapa Library Quantification Kit  
180 (Kapa Biosystems, Wilmington, MA, USA). The qPCR quantified libraries were pooled in  
181 equimolar amounts to create a final multiplexed library pool for sequencing on an Illumina  
182 sequencer.

183

#### 184 **Nanopore MinION library preparation and sequencing**

185 Genomic DNA (1.5µg) was end-repaired (NEBnext ultra II end repair kit, New England  
186 Biolabs, MA, USA), cleaned up with 1x AmPure beads (Beckmann Coulter,USA). Adapter  
187 ligation were performed for 20 minutes using NEB blunt/ TA ligase (New England Biolabs,

188 MA, USA). Library mix were cleaned up using 0.4X AmPure beads (Beckmann Coulter,  
189 USA) and eluted in 25 µl of elution buffer. Eluted Library were used for sequencing. Whole  
190 genome library were prepared by using ligation sequencing kit SQK-LSK108-Oxford  
191 Nanopore Technology (ONT) from Oxford Nanopore Technology. Sequencing were  
192 performed on MinION Mk1b (Oxford Nanopore Technologies, Oxford, UK) using SpotON  
193 flow cell (FLO-MIN106) in a 48hr sequencing protocol on MinKNOW 1.1.20 from ONT.

194

### 195 **Illumina raw data QC and processing**

196 The Illumina reads were de-multiplexed using Illumina bcl2fastq. The Illumina generated  
197 raw data for genomic libraries was quality checked using FastQC (Andrews, S., 2010). The  
198 paired-end Illumina reads were processed for clipping the adapter and low-quality bases  
199 using customized script which retains minimum 70% bases/reads with Phred score ( $Q \geq 30$  in  
200 each base position) with a read length of 50 bp. The MP libraries were trimmed for adapter  
201 and low-quality base trimming from the 3'-end using PLATANUS internal trimmer (Kajitani,  
202 R., et al.).

203

### 204 **Nanopore reads base calling and processing**

205 Base calling was performed using Metrichor V.2.43.1 is a cloud based analysis tool provided  
206 by Oxford Nanopore Technology software suite. The Nanopore reads were processed using  
207 Poretools (Loman, NJ., et al.) for converting fast5 files to fasta format. For further  
208 quantification and analysis the 2D reads or 1D high quality reads were selected for further  
209 assembly.

210

### 211 ***De novo* genome assembly and genome size estimation**

1  
2  
3  
4  
5  
6  
7  
8  
9  
10  
11  
12  
13  
14  
15  
16  
17  
18  
19  
20  
21  
22  
23  
24  
25  
26  
27  
28  
29  
30  
31  
32  
33  
34  
35  
36  
37  
38  
39  
40  
41  
42  
43  
44  
45  
46  
47  
48  
49  
50  
51  
52  
53  
54  
55  
56  
57  
58  
59  
60  
61  
62  
63  
64  
65

212 The quality checked Nanopore reads were error-corrected using Illumina PE reads. For error-  
213 correction the Illumina PE-reads were aligned to the Nanopore reads by using BWA aligner  
214 (Li, H., et al.). The paired-end reads were assembled using Abyss (Birol. I., et al.) followed  
215 by contig extension using Nanopore reads using SSPACE-LongRead (Boetzer, M., et al.).  
216 Super scaffolding of the assembled scaffold was performed using SSPACE (Boetzer, M., et  
217 al.) and PLATANUS using the Nanopore and Matepair data. Final draft genome resulted  
218 after gap closure by GAPCLOSER and PLATANUS gap\_close tool using Illumina data. The  
219 genome size was estimated using a k-mer distribution plot using JELLYFISH (Marcais, G., et  
220 al.). The repetitive elements were identified in the final assembled draft genome using Repeat  
221 Masker tool. The draft genome was hardmasked by using reference genomic repeats of *G.*  
222 *gallus*. The assembly and annotation workflow overview has been represented as Figure 2.

223

### 224 **Simple sequence repeats prediction**

225 Final assembled scaffolds were analysed for Simple Sequence Repeats (SSR) identification.  
226 SSRs like the di, tri, tetra, penta and hexa-nucleotide repeats in the genome were obtained  
227 using MISA (Version 1.0.0).

228

### 229 **Genome prediction and annotation**

230 Gene models was predicted on a hard masked draft genome, where the repetitive elements in  
231 the draft genome were masked using genomic repeats of *G. gallus* with Repeatmasker tool  
232 and further genes were predicted using AUGUSTUS with *G. gallus* as a reference model.  
233 The predicted proteins were annotated by using BLASTP (Altshul, S., et al.) against all  
234 Avian sequences downloaded from UniProt Protein Database.

235

### 236 **Pathway Analysis of the draft genome**

237 The predicted proteins were searched against the KEGG-KAAS server (Moriya, Y., et al.) for  
238 pathway analysis. *G. gallus* (chicken), *Meleagris gallopavo* (turkey), *Taeniopygia guttata*  
239 (zebra finch), *Falco peregrinus* (peregrine falcon) were used as reference organism for  
240 pathway identification. The EuKaryotic Orthologous Groups (KOGs) were predicted using  
241 homology based approach.

### 243 **Mitochondrial genome assembly and annotation**

244 The generated scaffolds from the draft assembly were aligned against the *P. cristatus*  
245 mitochondria genome and the mapped reads were filtered and stitched using ABACUS  
246 software using the same reference (Zhou, TC., et al.). Further gap closure were performed  
247 with 3-7kb MP reads to generate an complete assembled mitochondrial genome. MITOS  
248 (Bernt, M., et al.) was used for gene annotation. Circular plot generated using GenomeVx  
249 (<http://wolfe.ucd.ie/GenomeVx/>) representing the localization of the gene in the assembled  
250 mitochondrial genome.

### 252 **Phylogenetic tree construction**

253 The assembled Peacock mitochondrial genome was searched against 695 avian mitochondrial  
254 genomes downloaded from NCBI. Based on the Blast-N homology results (with query  
255 coverage > 100, subject coverage > 95, % identity >85 and with 1% gaps allowed in the  
256 sequences). 51 mitochondrial genome sequences along with our assembled mitochondrial  
257 genome were filtered. Multiple sequence alignment with default parameters were performed  
258 using MUSCLE global sequence aligner. Phylogenetic trees were constructed using IQ-  
259 TREE version 1.5.6 ([www.iqtree.org](http://www.iqtree.org)). The parameters used for phylogenetic tree  
260 construction were ultrafast bootstrap (UFBoot, using the -bb option of 1000 replicates), and a  
261 standard substitution model (-m MFP) was given for tree generation. The generated trees

1  
2  
3  
4  
5  
6  
7  
8  
9  
10  
11  
12  
13  
14  
15  
16  
17  
18  
19  
20  
21  
22  
23  
24  
25  
26  
27  
28  
29  
30  
31  
32  
33  
34  
35  
36  
37  
38  
39  
40  
41  
42  
43  
44  
45  
46  
47  
48  
49  
50  
51  
52  
53  
54  
55  
56  
57  
58  
59  
60  
61  
62  
63  
64  
65

262 from IQ-TREE tool were visualized using Figtree (<http://tree.bio.ed.ac.uk/software/figtree/>)  
263 and the Brach-support values were recorded from the output “.treefile”. The trees were  
264 modified for better visualization under Trees section increasing order nodes were applied.

### 265 266 **Protein domain analysis**

267 Predicted proteins from Peacock, Chicken and Turkey with sequence length greater than 100  
268 amino acids were considered for protein domain analysis. All the protein sequences from  
269 each organism were searched against Pfam-A database using Pfam scan for protein domain  
270 identification.

### 271 272 **Avian protein families**

273 The protein sequences of 48 avian genomes was downloaded from the link  
274 <http://avian.genomics.cn/en/jsp/database.shtml> apart from the predicted proteins of the draft  
275 genome. Sequences greater than 100 amino acids from all the avian genomes were filtered  
276 and concatenated to a single fasta file. These sequences were clustered using CD-HIT (Fu, L.,  
277 et al.) with 90% alignment coverage for the shorter sequence with a length difference cutoff  
278 of 0.9. The single copy ortholog gene family present across all organisms and genes unique to  
279 peacock were filtered and annotated.

### 280 281 **Genome conservation analysis**

282 The assembled draft genome was aligned against the *G. gallus* genome using Chromosomer  
283 tool. Draft chromosomes were constructed based on alignment between fragments (scaffolds)  
284 using a reference genome. These reordered assembled genome was aligned against the  
285 Chicken genome using LAST aligner with NEAR (finding short-and-strong (near-identical)  
286 similarities.) parameter allowing for substitution and gap frequencies leading to the

1  
2  
3  
4  
5  
6  
7  
8  
9  
10  
11  
12  
13  
14  
15  
16  
17  
18  
19  
20  
21  
22  
23  
24  
25  
26  
27  
28  
29  
30  
31  
32  
33  
34  
35  
36  
37  
38  
39  
40  
41  
42  
43  
44  
45  
46  
47  
48  
49  
50  
51  
52  
53  
54  
55  
56  
57  
58  
59  
60  
61  
62  
63  
64  
65

287 identification of orthologs. These query mapped regions were filtered with greater than 1% of  
288 the maximum length for visualization using Circos.

289

290

## 291 **Results**

### 292 **DNA Sequencing data**

293 Five libraries of 150 bp paired-end from Illumina HiSeq technology were generated. The  
294 short-insert reads of 489,114,747 accounted to genome coverage of 146.7X and long-insert  
295 reads of 302,884,819 sequences was about 90.9X coverage with a total coverage of 236X.  
296 Sequencing of three mate-pairs of 3-5Kb, 5-7Kb of and 7-10Kb yielded 72,915,033,  
297 47,440,144 and 36,464,628 reads respectively with an approximate coverage of 21.9, 14.2  
298 and 10.9 respectively, with a total of 156 million reads of 47X coverage. Oxford Nanopore  
299 technology was used to generate 366,323 long reads having of 2,398,560,283 bp with  
300 coverage of 2.3X. The complete sequencing was generated to a depth of ~287X from  
301 Illumina and Nanopore platforms. The coverage was based on assuming the peacock genome  
302 size of about 1 Gb (Table S1).

303

### 304 **Genome assembly**

305 The assembly was performed on Illumina reads with Abyss *de novo* assembler that resulted  
306 in ~932 Mb (mega base) of genome with an N50 of 1639 bp. The extension of the contigs  
307 were performed with Nanopore reads which generated scaffolds with N50 of 14,748 bp.  
308 Super scaffolding of the assembled scaffold was performed using SSPACE and PLATANUS  
309 with MP libraries that generated ~916 Mb genome with the N50 value of 168,140bp. The  
310 final gap closer was executed using GAPCLOSER program with MP and PE-LI libraries  
311 which generated a draft genome of 1.02 GB (giga base). The draft genome assembly of *Pavo*



312 *cristatus* consists of 179,346bp scaffolds, with a N50 of 189,886bp with 37 scaffolds having  
313 sequence length  $\geq$ 1Mbp. Contigs above 5000 bp have covered a genome of ~0.915 Mb with  
314 N50 0.23 Mb. In the assembled genome there were ~0.4% of non ATGC characters (Table  
315 1).

316  
317 Complete mitochondrial genome of 16699 bp was obtained. Total of 22 tRNA, tow rRNA  
318 and 13 protein coding genes were identified in the assembled genome (Fig. 3a). A 100%  
319 similarity was observed with the preiously published Peacocks mitochondrial genome (Fig.  
320 S1a and S1b).

321

### 322 **Transposable Elements (TE)**

323 In the bird genome a total of 75,315,566 bp (7.3% of the genome) was predicted to have  
324 5.5% of Retroelements (with SINEs 0.08% and LINEs 4.71%), 6.25 % total interspersed  
325 repeats with 0.84 % simple repeats and 0.21% low complexity regions. The DNA  
326 transposons identified in the genome was 0.71% (Table S2).

327

### 328 **Protein coding gene annotation**

329 A total of 23,153 proteins were predicted in the assembled draft genome using AUGUSTUS.  
330 Among them 95% predicted genes were annotated against the other Aves proteins. The  
331 21,854 annotated proteins showed top similarity to species *Gallus gallus* (Chicken) with  
332 11,398 proteins, *Meleagris gallopavo* (Common turkey) with 4059 proteins, *Amazona aestiva*  
333 (Blue-fronted Amazon parrot) with 1352 proteins and *Anas platyrhynchos* (Mallard) (*Anas*  
334 *boschas*) with 849 proteins. Thirteen species had about 100 to 400 annotated proteins. The  
335 remaining proteins were in the range of 1 to <100 proteins in about 62 species. From the

336 annotations a total of 13,161 proteins showed similarity to uncharacterized protein annotation  
337 and some of the over represented proteins were Tyrosine-protein kinase, Sulfotransferase,  
338 Phosphoinositide phospholipase C, Tetraspanin, Phospholipid-transporting ATPase,  
339 Olfactory receptor, Polypeptide N-acetylgalactosaminyltransferase, Transporter, Keratin,  
340 Hexosyltransferase, Protein Wnt, Kinesin-like protein, Gap junction protein, Claudin, POU  
341 domain protein, Sodium/hydrogen exchanger, Phospholipid-transporting ATPase, Histone-  
342 lysine N-methyltransferase and others (Table S3). The gene ontology annotations showed to  
343 have Gene Ontology (GO) descriptions for 18,295 proteins. Among them, 14,490 proteins  
344 have Molecular Function; 11,679 have Biological Process and 13,736 proteins have Cellular  
345 Component as functional categories.

346 About 17.7% of proteins were found to have pathway information against the KEGG  
347 database (Table S4). Some of the overrepresented annotations were Kinases like MAPK  
348 (mitogen-activated protein kinase); JNK (c-Jun N-terminal kinase); RAF (RAF proto-  
349 oncogene serine/threonine-protein kinase); AKT (RAC serine/threonine-protein kinase);  
350 protein kinases and different GTPases.

351 Proteins searched against the KOG annotations showed a total of 20,937 proteins having  
352 annotations. Among them, the most abundant annotations include Zn-finger, transmembrane  
353 receptor, ubiquitin ligase, Leucine rich repeat, Cadherin repeats, Serine/threonine protein  
354 kinase, Collagens, Ankryin repeat, Fibrillins, Voltage-gated Ca<sup>2+</sup> channels and Hormone  
355 receptors (Table S5). The peacock proteins when searched against the human proteins  
356 showed expansions in ontologies for cell morphogenesis, neuronal projection and  
357 development and GTPases (Table S10 and Fig. S4).

358

359

360 **Simple sequence repeats**

361 A total of 399,493 SSRs were identified from the peacock genome assembly. The largest  
362 fraction of SSRs identified were mononucleotide (60.04%), followed by tetra nucleotide  
363 (26%), di nucleotide (8.51%), tri nucleotide (4.31%), penta nucleotide (1.03%) and finally  
364 hexa nucleotide (0.13%). Among the SSRs identified, A (49.2%) and T (44.9%) accounted  
365 for 94.1% of the mono-nucleotide repeats. AT (23.8%), TA (16.5%), TG(13.7%), AC(10.6%)  
366 and CA (10.32%) accounted for 75% of the di-nucleotide repeats. while TTG (9.9%), AAT  
367 (9.6%), AAC (9.4%), TTA (7.1%), ATT (4.5%), TAA (3.5%), CAA (3.1%) and GGA  
368 (2.69%) accounted for 49.7% of the tri-nucleotide repeats (Table S6).

369

### 370 **Avian protein family analysis**

371 A total of 748,544 protein sequences from 49 avian species have 653,497 protein sequences  
372 of length above 100 amino acids (Table S7A). A total of 240,853 gene clusters were  
373 generated of which 41 gene clusters had single copy orthologs in all avian species (Table S7B  
374 and Table S7C). With the above stringent cutoff we observed 15,913 gene clusters were  
375 unique to peacock species.

376

### 377 **Phylogeny and Genome comparisons**

378 The phylogeny of 51 mitochondrial genome sequences along with peacock genome showed a  
379 clade consisting of *Pavo* species and *Gallus* (red junglefowl, Sri Lankan junglefowl, grey  
380 junglefowl, grey junglefowl), *Bambusicola* (Mountain Bamboo-partridge, Chinese bamboo  
381 partridge) and *Francolinus* (Chinese francolin). It can be observed many species were  
382 distributed in two different clades where 34 species were found in one clade and five species  
383 in other clade. Some of the endemic or native bird species like *Arborophila ardens*, *Acryllium*  
384 *vulturinum* and *Numida meleagris* were found as clear outgroup of species in this study (Fig.  
385 3b).

1 386 Predicted proteins from Peacock, Chicken and Turkey were searched for protein domain  
2 387 analysis. 81% of the Pfams were common among the three species. About 94%, 98.4% and  
3  
4 388 99.7% predicted Pfam domains were identified in Peacock, Chicken and Turkey respectively.  
5  
6  
7 389 There were 255, 69 and 14 Pfam domains found to be unique in the species mentioned above  
8  
9  
10 390 respectively (Fig. 4).

11  
12 391 The assembled Peacock genome was reordered for pseudo chromosomes generation against  
13  
14 392 the simple repeat masked Chicken genome (1.21 GB, Warren, WC., et al.) using  
15  
16  
17 393 Chromosomer which generated a overall reordered Peacock genome of about 597MB. The  
18  
19 394 right side of the image represents the reference genome and left side of the image represents  
20  
21  
22 395 the Peacock genome (Fig. 5).

23  
24 396

## 25 26 397 **Conclusions**

27  
28  
29 398 Third generation sequencing in avian genomics where long reads having the substantiality to  
30  
31 399 improve genome assembly will benefit understanding the organisms in the structurally  
32  
33  
34 400 complex regions having repeat elements and isoforms in the genome (Goodwin, S., et al.).  
35  
36 401 Using a combination of short reads of different insert sizes as well as mate pair reads  
37  
38  
39 402 generated from Illumina technology along with long reads from Oxford Nanopore, we  
40  
41 403 obtained an improved assembly and a draft genome of the Indian Blue Peacock (*Pavo*  
42  
43 404 *cristatus*). In comparison to other avian genomes (Zhang, G., et al.), the current 290X  
44  
45  
46 405 sequencing depth obtained from our study is one of the highest. With a N50 of 0.23Mb, we  
47  
48  
49 406 presented here a reasonably reliable draft genome for the peacock species. The inclusion of  
50  
51 407 Nanopore reads 366,323 for scaffolding followed by subsequent gap-closing using Illumina  
52  
53 408 data led to a 26.2% reduction in the number of scaffolds and a 50.65% and 115% increase in  
54  
55  
56 409 the scaffold and contig N50, respectively. With only 2.3X of long reads, a significant  
57  
58 410 improvement in the assembly was observed. On the contrary, the assembly contained less  
59  
60  
61  
62  
63  
64  
65

1  
2  
3  
4  
5  
6  
7  
8  
9  
10  
11  
12  
13  
14  
15  
16  
17  
18  
19  
20  
21  
22  
23  
24  
25  
26  
27  
28  
29  
30  
31  
32  
33  
34  
35  
36  
37  
38  
39  
40  
41  
42  
43  
44  
45  
46  
47  
48  
49  
50  
51  
52  
53  
54  
55  
56  
57  
58  
59  
60  
61  
62  
63  
64  
65

411 than 0.4% of unknown nucleotides, which is very low for a draft assembly. With the addition  
412 of more long reads along with transcriptomic sequencing along with scaffolding and/or gap  
413 closure tools, further improvement in the assembly can be achieved.

414  
415 Peacock seems to defy the Darwinian laws of natural selection. These concern were raised by  
416 no other than Darwin himself. Hence, he proposed the theory of the sexual selection where  
417 the female can choose for a male with a certain phenotypic feature such as brilliant color or a  
418 long tail (Burgess, S.). Peacock's brilliantly colored long tail feathers seems to evolve at the  
419 cost of finding its female partner thereby contributing its beneficial genes, even at the cost of  
420 making itself venerable to predators. A female peafowl in turn tends to choose the mate with  
421 the largest and decorated plumage, which indirectly reflects its healthiness and capacity to  
422 wade off potential competitors thereby selecting the most suitable male. Peacocks beautiful  
423 feathers with it all its artistry surely provides it with an advantage to impress the females  
424 (Dakin, R., et al.). Understanding the formation of beautiful feathers from the genomic  
425 context will help in resolving several evolutionary theories on sexual selection that have been  
426 discussed on this species.

427 Pigment particles are embedded into the newly grown peacock feathers during the molting  
428 season which seems to absorb light of selective wavelength there by imparting to the color of  
429 the plumage (Mercedes Foster, Rennee Riedler, et al.) Pigment morphogenesis in *Gallus* has  
430 been reported by a process of melanoblasts migration and colonization into feather bud where  
431 they differentiate to produce the pigment, melanin (Kelsh, RN., et al.). The molecular  
432 mechanisms that control the pigment cell migration have been narrowed down to proteins  
433 Kit1 and FGFs which maintain the melanoblasts migration to feathers. Kit and FGF proteins  
434 have also been identified in our current study (Table S3). Understanding of these proteins in  
435 the patterned formation will help decode the pigment pattern morphology in peacocks. These  
436 pigmented patterns play a role in communication, choice of mate and in some species it can  
437 help in camouflage (Burgess, S)

1  
2  
3  
4  
5  
6  
7  
8  
9  
10  
11  
12  
13  
14  
15  
16  
17  
18  
19  
20  
21  
22  
23  
24  
25  
26  
27  
28  
29  
30  
31  
32  
33  
34  
35  
36  
37  
38  
39  
40  
41  
42  
43  
44  
45  
46  
47  
48  
49  
50  
51  
52  
53  
54  
55  
56  
57  
58  
59  
60  
61  
62  
63  
64  
65

438 It has been observed that the variations in the genome size among bird species are very low  
439 (Table S8). The genome complexities of a species are influenced by the Transposable  
440 elements (TE) that are believed to play a crucial role (Kapsuta, A., et al.). The long read  
441 sequences have significantly helped in resolving the TEs in genome quality and assembly.  
442 Peacock genome comparisons with Turkey and Chicken have showed closeness to the  
443 Chicken species. The mitochondrial phylogeny also revealed similar findings. Homology  
444 searches have shown several important gene family expansions such as Kinases, Zn finger  
445 proteins, GTPases and others. Their roles in biology, development and evolution of the  
446 Peacocks have to be further explored.

447 To summarize, we have assembled the *Pavo* genome using Illumina and Oxford nanopore  
448 technology. The genome information can be valued and explored by avian enthusiasts to  
449 further understand about this bird. Though not critically endangered yet, in India, peafowl  
450 population is surely at a decline in the wild due to massive deforestation and habitat loss.  
451 Thus is further compounded by increased poaching for meat and feathers. Our genome  
452 sequencing initiative of *Pavo cristatus* is not just only from a conservational viewpoint, but  
453 also to preserve a heritage associated with this bird that runs through centuries and that bears  
454 a strong attachment to the national psyche.

1  
2  
3  
4  
5  
6  
7  
8  
9  
10  
11  
12  
13  
14  
15  
16  
17  
18  
19  
20  
21  
22  
23  
24  
25  
26  
27  
28  
29  
30  
31  
32  
33  
34  
35  
36  
37  
38  
39  
40  
41  
42  
43  
44  
45  
46  
47  
48  
49  
50  
51  
52  
53  
54  
55  
56  
57  
58  
59  
60  
61  
62  
63  
64  
65

456 **Availability of supporting data**

457 Supplementary data contains, read statistics, annotation, repeats identification, orthology  
458 analysis, mitochondria assembly and annotation. Figures, Gene ontology. DNA and library  
459 preparation protocols.

460

461 **Raw Data in SRA**

462 Raw reads (Illumina and Nanopore) are available in the Sequence Read Archive (SRA), and  
463 the Whole Genome Shotgun project has been deposited at GenBank under SRA Submission  
464 ID: SUB3108024, Bioproject: PRJNA413288 and Biosamples SAMN07739105 :  
465 SKPea2016\_SI, SAMN07739104 : SKPea2016\_LI, SAMN07739101 : FPL\_3\_5KB,  
466 SAMN07739102 : FPL\_5\_7KB, SAMN07739103 : FPL\_7\_10KB and SAMN07739107 :  
467 FPL\_Nano.

468

469 **Competing interests**

470 The author(s) declare that they have no competing interests.

471

472 **Authors contributions**

473 RD, AS, KP performed wet lab experiments; RD designed work plan, experiments and  
474 logistics; SS, VR, KP SG IM and AR assisted with the work; RS provided samples from bird;  
475 BR, SK performed data analysis and interpretation; SK, BR, RD drafted the manuscript and  
476 SK overseen the whole project.

477

478

479

480

481 **Acknowledgements**

1  
2 482 Department of Biochemistry, AIIMS, New Delhi for providing space and infrastructure to  
3  
4  
5 483 carry on the work. RD for providing partial funding. Kritika Tripathi for inputs with  
6  
7 484 manuscript editing. Raja and Sudha from Genotypic Technology Pvt. Ltd for providing  
8  
9  
10 485 sequencing services and also Deepti, Shalini, Nagu, Abhi and Manish. BR acknowledges IUT  
11  
12 486 34-4.

13  
14 487

15  
16  
17 488  
18  
19  
20  
21  
22  
23  
24  
25  
26  
27  
28  
29  
30  
31  
32  
33  
34  
35  
36  
37  
38  
39  
40  
41  
42  
43  
44  
45  
46  
47  
48  
49  
50  
51  
52  
53  
54  
55  
56  
57  
58  
59  
60  
61  
62  
63  
64  
65



489 **Tables**

490 Table 1. *De novo* assembly statistics of the Peacock genome.

| Description      | Contigs   | Nanopore Scaffold | Super Scaffolds | GapClosed  | >1000 Kb  | >5000 Kb  |
|------------------|-----------|-------------------|-----------------|------------|-----------|-----------|
| Contigs          | 685241    | 281272            | 179346          | 179346     | 34181     | 15026     |
| Maximum Length   | 49159     | 251510            | 2390121         | 2488982    | 2488982   | 2488982   |
| Minimum Length   | 300       | 5                 | 265             | 265        | 1000      | 5000      |
| Average Length   | 1360      | 3250              | 5111            | 5729       | -         | -         |
| Total Length     | 932162464 | 914363908         | 916720956       | 1027551907 | 954483822 | 915373606 |
| Length >= 100 bp | 685241    | 281271            | 179346          | 179346     | 34181     | 15026     |
| Length >= 200 bp | 685241    | 281271            | 179346          | 179346     | 34181     | 15026     |
| Length >= 500 bp | 616120    | 186433            | 93727           | 93727      | 34181     | 15026     |
| Length >= 1 Kbp  | 363428    | 104479            | 34168           | 34181      | 34181     | 15026     |
| Length >= 10 Kbp | 1591      | 24748             | 9249            | 10311      | 10311     | 10311     |
| Length >= 1 Mbp  | 0         | 0                 | 27              | 37         | 37        | 37        |
| Non-ATGC #       | 350325    | 42696911          | 49169831        | 4034372    | 4032567   | 3978757   |
| Non-ATGC %       | 0.038     | 4.67              | 5.364           | 0.393      | 0.422     | 0.435     |
| N50 value        | 1639      | 14748             | 168140          | 189886     | 218023    | 232312    |

491

492

493 **Figure legend**

1  
2 494 **Figure 1.** The beautiful and charismatic photo of Indian blue peacock (*Pavo cristatus*) bird.

3  
4  
5 495 **Figure 2.** Detailed workflow for *de novo* genome assembly and annotation.

6  
7 496 **Figure 3a.** Circular representation of Peacock mitochondrial genome with genes predicted.

8  
9  
10 497 **Figure 3b.** Phylogenetic tree generated from mitochondrial genome from 52 different avian  
11 species.

12  
13  
14 499 **Figure 4.** Circular image of the assembled peacock genome aligned against the *G. gallus*  
15 genome using Chromosomer tool. Draft chromosomes were generated by similarity between  
16 scaffolds which were arranged on the reference chicken genome. Circos was used for  
17 500  
18  
19 501  
20  
21  
22 502  
23 visualization.

24 503 **Figure 5.** Venn diagram showing common and unique Protein family domains (Pfam)  
25  
26 504  
27 between Peacock, Chicken and Turkey proteins.

28  
29 505  
30  
31  
32  
33  
34  
35  
36  
37  
38  
39  
40  
41  
42  
43  
44  
45  
46  
47  
48  
49  
50  
51  
52  
53  
54  
55  
56  
57  
58  
59  
60  
61  
62  
63  
64  
65

506 **References:**

1  
2 507 Gadagkar, R., 2003. Is the peacock merely beautiful or also honest?. *Current Science*, 85(7),  
3  
4 508 pp.1012-1020.

5 509  
6  
7 510 Kushwaha, S., and Kumar, A. 2016. A Review on Indian Peafowl (*Pavo cristatus*) Linnaeus,  
8  
9 511 1758. *Journal of Wildlife and Research*, 4, 42-59.

10 512  
11  
12 513 Kadgaonkar, Shivendra B. 1993. The peacock in ancient Indian art and literature. *Bulletin of*  
13  
14 514 the Deccan College Research Institute, vol. 53, pp. 95–115. JSTOR,  
15  
16 515 [www.jstor.org/stable/42936434](http://www.jstor.org/stable/42936434).

17 516  
18  
19 517 Brickle, N. 2002. Habitat use, predicted distribution and conservation of green peafowl (*Pavo*  
20  
21 518 *muticus*) in Dak Lak Province, Vietnam. *Biological Conservation*, 105: 189-197.

22  
23 519  
24  
25 520 Jackson, C. 2006. *Peacock*. London: Reaktion Books Ltd.

26 521  
27  
28 522 Zhang, G., Jarvis, E. D., and Gilbert, M. T. P. 2014. A flock of genomes. *Science* 346, 1308–  
29  
30 523 1309.

31 524  
32  
33 525 International Chicken Genome Sequencing Consortium. 2004. Sequence and comparative  
34  
35 526 analysis of the chicken genome provide unique perspectives on vertebrate evolution. *Nature*,  
36  
37 527 432(7018), 695.

38 528  
39  
40 529 Kajitani, R., Toshimoto, K., Noguchi, H., Toyoda, A., Ogura, Y., Okuno, M., Yabana, M.,  
41  
42 530 Harada, M., Nagayasu, E., Maruyama, H. and Kohara, Y., 2014. Efficient de novo assembly  
43  
44 531 of highly heterozygous genomes from whole-genome shotgun short reads. *Genome research*,  
45  
46 532 24(8), pp.1384-1395.

47 533  
48  
49 534 Loman, N. J. and Quinlan, A. R. 2014. Poretools: a toolkit for analyzing nanopore sequence  
50  
51 535 data. *Bioinformatics*, 30(23), 3399-3401.

52 536  
53  
54 537 Li H. and Durbin R. 2009. Fast and accurate short read alignment with Burrows-Wheeler  
55  
56 538 Transform. *Bioinformatics*, 25:1754-60.

57 539

540 Birol, I., Jackman, S.D., Nielsen, C.B., Qian, J.Q., Varhol, R., Stazyk, G., Morin, R.D., Zhao,  
1 541 Y., Hirst, M., Schein, J.E. and Horsman, D.E., 2009. De novo transcriptome assembly with  
2 542 ABySS. *Bioinformatics*, 25(21), pp.2872-2877.  
3  
4 543  
5  
6 544 Boetzer, Marten, and Walter Pirovano. 2014. SSPACE-LongRead: scaffolding bacterial draft  
7 545 genomes using long read sequence information. *BMC bioinformatics* 15.1: 211  
8  
9 546  
10 547 Boetzer, M., Henkel, C.V., Jansen, H.J., Butler, D. and Pirovano, W., 2010. Scaffolding pre-  
11 548 assembled contigs using SSPACE. *Bioinformatics*, 27(4), pp.578-579.  
12  
13 549  
14 550 Marcais, G and Kingsford, C. 2011. A fast, lock-free approach for efficient parallel counting  
15 551 of occurrences of k-mers. *Bioinformatics* 27(6): 764-770.  
16  
17 552  
18 553 Altschul, S.F., Gish, W., Miller, W., Myers, E.W. and Lipman, D.J., 1990. Basic local  
19 554 alignment search tool. *Journal of molecular biology*, 215(3), pp.403-410.  
20  
21 555  
22 556  
23 557 Moriya, Y., Itoh, M., Okuda, S., Yoshizawa, A.C. and Kanehisa, M., 2007. KAAS: an  
24 558 automatic genome annotation and pathway reconstruction server. *Nucleic acids research*,  
25 35(suppl\_2), pp.W182-W185.  
26  
27 559  
28 560 Zhou, T.C., Sha, T., Irwin, D.M. and Zhang, Y.P., 2015. Complete mitochondrial genome of  
29 561 the Indian peafowl (*Pavo cristatus*), with phylogenetic analysis in phasianidae. *Mitochondrial*  
30 562 *DNA*, 26(6), pp.912-913.  
31  
32 563  
33 564 Bernt, M., Donath, A., Jühling, F., Externbrink, F., Florentz, C., Fritzsche, G., Pütz, J.,  
34 565 Middendorf, M. and Stadler, P.F., 2013. MITOS: improved de novo metazoan mitochondrial  
35 566 genome annotation. *Molecular phylogenetics and evolution*, 69(2), pp.313-319.  
36  
37 567  
38 568 Fu, L., Niu, B., Zhu, Z., Wu, S. and Li, W., 2012. CD-HIT: accelerated for clustering the  
39 569 next-generation sequencing data. *Bioinformatics*, 28(23), pp.3150-3152.  
40  
41 570  
42 571 Warren, W.C., Hillier, L.W., Tomlinson, C., Minx, P., Kremitzki, M., Graves, T., Markovic,  
43 572 C., Bouk, N., Pruitt, K.D., Thibaud-Nissen, F. and Schneider, V., 2016. A new chicken  
44  
45  
46  
47  
48  
49  
50  
51  
52  
53  
54  
55  
56  
57  
58  
59  
60  
61  
62  
63  
64  
65

573 genome assembly provides insight into avian genome structure. G3: Genes, Genomes,  
1 574 Genetics, pp.g3-116.  
2  
3 575  
4  
5 576 Goodwin, S., McPherson, J.D. and McCombie, W.R., 2016. Coming of age: ten years of  
6 next-generation sequencing technologies. Nature Reviews Genetics, 17(6), p.333.  
7 577  
8  
9 578  
10  
11 579 Zhang, G., Li, C., Li, Q., Li, B., Larkin, D.M., Lee, C., Storz, J.F., Antunes, A., Greenwold,  
12 M.J., Meredith, R.W. and Ödeen, A., 2014. Comparative genomics reveals insights into avian  
13 580 genome evolution and adaptation. Science, 346(6215), pp.1311-1320.  
14 581  
15  
16 582  
17  
18 583 Burgess, S., 2001. The beauty of the peacock tail and the problems with the theory of sexual  
19 selection. Journal of Creation, 15(2), pp.94-102..  
20 584  
21  
22 585  
23  
24 586 Dakin, R. 2008. The role of the visual train ornament in the courtship of peafowl, *Pavo*  
25 *cristatus*. Masters Abstracts International, 47/03: 97.  
26 587  
27 588  
28  
29 589 Mercedes S Foster 1975. The overlap of molting and breeding in some birds. The Condor  
30 77:304-314.  
31 590  
32  
33 591  
34  
35 592 Renee Riedler, Christel Pesme, James Druzik, Molly Gleeson, Ellen Pearlstein The Journal of  
36 the American Institute of Conservation 2014  
37 593  
38 594  
39  
40 595  
41  
42 596 Kelsh, R.N., Harris, M.L., Colanesi, S. and Erickson, C.A., 2009. Stripes and belly-spots—a  
43 review of pigment cell morphogenesis in vertebrates. Seminars in cell & developmental  
44 597 biology. Vol. 20, No. 1, pp. 90-104.  
45 598  
46  
47 599  
48  
49 600 Kapusta, A. and Suh, A., 2017. Evolution of bird genomes—a transposon's- eye  
50 view. Annals of the New York Academy of Sciences, 1389(1), pp.164-185.  
51 601  
52  
53 602  
54  
55 603  
56  
57 604 **Webservers:**  
58 605 FastQC : <http://www.bioinformatics.babraham.ac.uk/projects/fastqc/>  
59  
60 606 AUGUSTUS : <http://augustus.gobics.de/>  
61  
62  
63  
64  
65

607 PLATANUS : <http://platanus.bio.titech.ac.jp/>  
1  
2 608 ABACUS : <http://abacas.sourceforge.net/Manual.html>  
3  
4 609 MISA: <http://pgrc.ipk-gatersleben.de/misa/>  
5  
6 610 REPEATMASKER : <http://www.repeatmasker.org/>  
7  
8 611 KOGs : <https://genome.jgi.doe.gov/portal/help/kogbrowser.jsf>  
9  
10 612 KAAS : <http://www.genome.jp/tools/kaas/>  
11  
12 613 MITOS : <http://mitos.bioinf.uni-leipzig.de/>  
13  
14 614 MUSCLE : <https://www.drive5.com/muscle/>  
15  
16 615 PFAMSCAN : <https://www.ebi.ac.uk/seqdb/confluence/display/THD/PfamScan>  
17  
18 616 LAST : <http://last.cbrc.jp/>  
19  
20 617 CHROMOSOMER : <https://github.com/gtamazian/chromosomer>  
21  
22  
23  
24  
25  
26  
27  
28  
29  
30  
31  
32  
33  
34  
35  
36  
37  
38  
39  
40  
41  
42  
43  
44  
45  
46  
47  
48  
49  
50  
51  
52  
53  
54  
55  
56  
57  
58  
59  
60  
61  
62  
63  
64  
65

1 ***De novo* genome assembly of Indian Blue Peacock (*Pavo***  
2 ***cristatus*), from Oxford Nanopore and Illumina sequencing**  
3 **reads**

4  
5  
6 **Authors:** Ruby Dhar<sup>1</sup>, Ashikh Seethy<sup>1</sup>, Karthikeyan Pethusamy<sup>1</sup>, Vishwajeet Rohil<sup>2</sup>, Sunil  
7 Singh<sup>1</sup>, Kakali Purkayastha<sup>2</sup>, Sandeep Goswami<sup>1</sup>, Rakesh Singh<sup>3</sup>, Indrani Mukherjee<sup>1</sup>, Ankita  
8 Raj<sup>1</sup>, Tryambak Srivastava<sup>1</sup>, Sovon Acharya<sup>1</sup>, Balaji Rajashekhar<sup>4,\*</sup> and Subhradip  
9 Karmakar<sup>1,\*</sup>

10  
11 **Affiliation:** <sup>1</sup>Department of Biochemistry, AIIMS, New Delhi, India. <sup>2</sup> Vallabhbhai Patel Chest  
12 Institute (VPCI), New Delhi, India. <sup>3</sup>Kanpur Zoo, Kanpur, India. <sup>4</sup>Institute of Computer Science,  
13 University of Tartu, 50409 Tartu, Estonia.

14  
15 **\*Corresponding Authors email:** subhradip.k@aiims.edu, balaji@ut.ee

16  
17  
18  
19 **Running Title:** De novo Genome Assembly of the Peacock Bird

20  
21  
22 **Key words:** Peacock, *Pavo cristatus*, Indian National Bird, Genome Assembly, Oxford  
23 Nanopore.

24 **Abstract**

## 25 **Background**

1  
2 26 *Pavo cristatus* the Indian blue peacock are geographically found distributed in natural habitats  
3  
4 27 of South Asia. Peacock has been described among the bird species as one of the most elegant,  
5  
6 28 majestic and beautiful bird (Fig. 1). Since prehistoric times they have been described in Indian  
7  
8 29 culture and has been adopted as the national bird of India. Its length varies from 92-125  
9  
10 30 centimeter (without train), weighing about 4-8 Kilograms and lives up to 20 years in the wild.  
11  
12 31 The avian species have been very important in the fields of phylogenetics, developmental  
13  
14 32 studies, sexual reproduction and speciation. Avian genomics have contributed immensely  
15  
16 33 towards understanding the vertebrate genome evolution. Here we present the first draft genome  
17  
18 34 sequence of *P. cristatus*, yet another important bird species to further add values and gain  
19  
20 35 insight into avian genomics.  
21  
22 36

## 24 37 **Findings**

26 38 For the first time in avian genomics, long reads using Oxford Nanopore technology have been  
27  
28 39 used for the whole genome assembly. We sequenced different DNA insert size libraries from  
30  
31 40 Illumina and long read Nanopore technologies from the peacock DNA. We performed *de novo*  
32  
33 41 genome assembly by integrating the reads from Illumina short insert, long insert, multiple  
34  
35 42 mate-pair reads along with Nanopore long reads using multiple genome improvement tools. A  
36  
37 43 draft of the peacock genome of about 0.915 Gigabases (Gb) with a N50 of 0.23 Megabases  
38  
39 44 (Mb) was assembled. Annotations with other avian species, protein families, KEGG were  
40  
41 45 performed for functional understanding by insilico approaches. Proteins were compared  
42  
43 46 against Chicken, Turkey and Human to obtain evolutionary similarities and uniqueness of the  
44  
45 47 *Pavo* species.  
46  
47 48

## 53 49 **Conclusions**

55 50 Our most important findings from the genome sequence of *P. cristatus* is to decipher the  
56  
57 51 different gene families and to understand their role in body pattern development and other  
58  
59  
60  
61  
62  
63  
64  
65



1  
2  
3  
4  
5  
6  
7  
8  
9  
10  
11  
12  
13  
14  
15  
16  
17  
18  
19  
20  
21  
22  
23  
24  
25  
26  
27  
28  
29  
30  
31  
32  
33  
34  
35  
36  
37  
38  
39  
40  
41  
42  
43  
44  
45  
46  
47  
48  
49  
50  
51  
52 features that truly makes this bird unique. The genome sequence also gives insights on its  
53 genetic lineage and evolution with relation to other avian members. Several hypothesis and  
54 theories have been discussed with respect to sexual selection; now with the understanding of  
55 the genome sequence, some of these evolutionary theories will be better understood. The  
56 genome will also support future studies on population genetics and breeding for species  
57 conservation as well as in understanding its evolutionary ecology and sexual dimorphism. The  
58 comparative genomics with other avian species and specifically with *Gallus gallus* (Chicken)  
59 and *Meleagris gallopavo* (Turkey) have shown insights into the gene families and their  
60 conserved domains. *Pavo* proteins were also compared with human to understand the  
61 functional components that were conserved after the speciation split.  
62

63 **Introduction**

64 *Pavo cristatus* commonly known as the blue Indian peacock obtained the status of National  
65 Bird of India in 1963. Peacocks have been distributed widely in Asian countries. The bird is  
66 very popular as it symbolizes beauty, love, grace and pride (Gadagkar, R; Kushwaha, et al.). It  
67 has been referred in ancient literatures of India and has been found closely associated with the  
68 life and culture of the peoples from South East Asia and particularly India (Kadgaonkar, SB).  
69 Peacocks are native to South Asia but have been introduced into many other countries usually  
70 as exhibits in park, zoos and also large number of aviculturists raise and breed these species as  
71 pets (Brickle, N; Jackson, C).

72  
73 International Chicken Genome Sequencing Consortium sequenced the *Gallus gallus* genome  
74 in 2004, and this laid the foundation for study of avian genomics. A decade later, the avian  
75 genome consortium assembled 48 genomes of wide variety of avian species to understand the  
76 evolutionary relationships of modern birds (Zhang, G., et al.). Raw sequencing data for each  
77 species were generated at from coverage of 6X for zebra finch to a maximum 160X for  
78 budgerigar. The genome size varied from 1.04 to 1.26 Gb (<http://avian.genomics.cn/en/>). The  
79 studies on different bird species have provided a new perspective on vertebrate genome  
80 evolution. These genomes have also helped in improving the annotation of mammalian  
81 genomes. There are several distinguishing as well as unique features between chicken and  
82 human genome including genome size which is of one third of humans, conserved synteny  
83 blocks complete absence of active short interspersed nucleotide elements (SINE) to mention a  
84 few (International Chicken Genome sequencing consortium).

85  
86 Despite the wealth of information from avian genomes sequencing projects, it is very important  
87 to genome sequence other new species to add value into aves and vertebrate genomics. For the

1 88 first time in bird genomics, Oxford Nanopore technology has been used to sequence a bird  
2 89 genome in this present study. The long read chemistry will help in better genome assembly of  
3  
4 90 the TEs and repeat rich. The peacock genome will aid in understanding about the uniqueness  
5  
6  
7 91 of this birds genome in comparison to other bird species. Comparative genomes will help in  
8  
9  
10 92 understanding the development of this species, sexual selection and its evolutionary  
11  
12 93 relationships with other birds. The characterization of the genes involved in sex determination  
13  
14 94 could provide relevant information for the selective breeding of the peafowl populations. We  
15  
16  
17 95 have unraveled some of the genomic signatures and thus have reported unique gene pools of  
18  
19 96 this bird by performing comparative genomics. Further different data types will improve the  
20  
21  
22 97 assembly and gene/genome characterization will help to address the sexual selection theory  
23  
24 98 and key answers relevant to the evolution of this bird.

25  
26 99

27  
28  
29 100

## 30 31 101 **Materials and methods**

### 32 33 102 **Sample collection and extraction of DNA**

34 103 The whole blood of male peacock was collected from Kanpur zoo, India after obtaining the  
35  
36 104 necessary ethical and institutional approval. 20µl of Proteinase K (PK) solution was taken into  
37  
38  
39 105 a 1.5ml micro centrifuge tube. 200µl of blood was added and briefly mixed. 200µl of cell lysis  
40  
41  
42 106 buffer was added to the tube, mixed by vortexing for 10seconds; incubated at 56°C for  
43  
44  
45 107 10minutes. ReliaPrep™ Binding Column was placed into an empty collection tube. 250µl of  
46  
47  
48 108 Binding Buffer (BBA) was added, capped the tube, and mixed by vortexing for 10 seconds  
49  
50  
51 109 with a vortex mixer. Contents of the tube were added to the ReliaPrep™ binding column,  
52  
53  
54 110 capped and placed in a refrigerated micro centrifuge. These were then centrifuged for 1 minute  
55  
56 111 at maximum speed and flow through was discarded. Binding column was placed into a fresh  
57  
58 112 collection tube. 500µl of column wash solution was added to the column and centrifuged for 3  
59  
60  
61  
62  
63  
64  
65

113 minutes at maximum speed; Flow through was again discarded. Column washing is repeated  
114 thrice. Columns were then placed in a nuclease free clean 1.5ml micro centrifuge tube. 100 µl  
115 of Nuclease-Free Water was then added to the column and centrifuged for an additional 1  
116 minute at maximum speed. Column was discarded and the elute was saved. The concentration  
117 and purity of the extracted DNA was evaluated using Nanodrop Spectrophotometer (Thermo  
118 Scientific) and Qubit flurometer and integrity was checked on a 0.8% agarose gel. The DNA  
119 sample was aliquoted for library preparation on two different platforms: Illumina HiSeq4000  
120 and Oxford Nanopore Technologies (ONT).

121

### 122 **HiSeq Paired-End library preparation and sequencing**

123 Whole genome sequencing (WGS) libraries were prepared with Illumina-compatible  
124 NEXTflex DNA sequencing kit (BIOO Scientific, Austin, Texas, U.S.A.). Briefly, approx. 1  
125 µg of genomic DNA was sheared using Covaris S2 sonicator (Covaris, Woburn,  
126 Massachusetts, USA) to generate approx. fragment size distribution from 300 to 600 basepair  
127 (bp). The fragment size distribution was checked on Agilent 2200 Tape Station with D1000  
128 DNA screen tapes and reagents (Agilent Technologies, Palo Alto, CA, USA) and subsequently  
129 purified using HighPrep magnetic beads (Magbio Genomics Inc, USA). The purified fragments  
130 were end-repaired, adenylated and ligated to Illumina multiplex barcode adaptors as per  
131 NEXTflex DNA sequencing kit protocol (BIOO Scientific, Austin, Texas, USA).

132

133 The adapter-ligated DNA was purified with HighPrep beads (MagBio Genomics, Inc,  
134 Gaithersburg, Maryland, USA) and then size selected on 2% low melting agarose gel and  
135 cleaned using MinElute column (QIAGEN). The resultant fragments were amplified for 10  
136 cycles of PCR using Illumina-compatible primers provided in the NEXTFlex DNA sequencing  
137 kit. The final PCR product (sequencing library) was purified with HighPrep beads, followed

138 by library quality control check. The Illumina-compatible sequencing library was initially  
139 quantified by Qubit fluorometer (Thermo Fisher Scientific, MA, USA) and its fragment size  
140 distribution was analyzed on Agilent TapeStation. Finally, the sequencing library was  
141 accurately quantified by quantitative PCR using Kapa Library Quantification Kit (Kapa  
142 Biosystems, Wilmington, MA, USA). The qPCR-quantified library was subjected to  
143 sequencing on an Illumina sequencer for 150 bp paired-end chemistry.

144  
145 The Illumina-compatible sequencing library for the samples has a fragment size range between  
146 275 to 425 bp for Paired-End Short Insert (PE-SI) and 350 bp to 650bp for Paired-End Long  
147 Insert (PE-LI). As the combined adapter size is approximately 120bp, the effective user-defined  
148 insert size is 155 to 305 bp and 230 to 530 bp for PE-SI and PE-LI respectively. Libraries were  
149 sequencing in Illumina HiSeq platform with 150\*2 chemistry. The short reads of Paired-End  
150 Short Insert (PE-SI), Paired-End Long Insert (PE-LI) and Mate-Pair (MP) from Illumina HiSeq  
151 platform.

152

153

#### 154 **Mate-Pair library preparation and sequencing**

155 Mate Pair sequencing library was prepared with Illumina-compatible Nextera Mate Pair  
156 Sample Preparation Kit (Illumina Inc., Austin, TX, U.S.A.). Briefly, approx. 4 ug of genomic  
157 DNA was simultaneously fragmented and tagged with Mate Pair adapters in a Transposon  
158 based Tagmentation step. Tagmented DNA was then purified using AMPure XP Magnetic  
159 beads (Beckman Coulter Life Sciences, Indianapolis, IN, U.S.A.) followed by Strand  
160 Displacement to fill gaps in the Tagmented DNA. Strand displaced DNA was further purified  
161 with AMPure XP beads before size-selecting the 3-5 Kilobases (Kb), 5-7 Kb & 7-10 Kb  
162 fragments on low melting agarose gel. The fragments were circularized in an overnight blunt-

163 end intra-molecular ligation step, which will result in circularization of DNA with the insert  
164 flanked mate pair adapter junction.

165  
166 The circularized DNA was sheared using Covaris S220 sonicator (Covaris, Woburn,  
167 Massachusetts, USA) to generate approx. fragment size distribution from 300 bp to 1000 bp.

168 The sheared DNA was purified to collect the Mate pair junction positive fragments using  
169 Dynabeads M-280 Streptavidin Magnetic beads (Thermo Fisher Scientific, Waltham, MA,  
170 U.S.A.). The purified fragments were end-repaired, adenylated and ligated to Illumina  
171 multiplex barcode adaptors as per Nextera Mate Pair Sample Preparation Kit protocol.

172  
173 The adapter-ligated DNA was then amplified for 15 cycles of PCR using Illumina-compatible  
174 primers. The final PCR product (sequencing library) was purified with AMPure XP beads,  
175 followed by library quality control check. The Illumina compatible sequencing library was  
176 initially quantified by Qubit fluorometer (Thermo Fisher Scientific, MA, USA) and its  
177 fragment size distribution was analyzed on Agilent TapeStation. Finally, the sequencing library  
178 was accurately quantified by quantitative PCR using Kapa Library Quantification Kit (Kapa  
179 Biosystems, Wilmington, MA, USA). The qPCR quantified libraries were pooled in equimolar  
180 amounts to create a final multiplexed library pool for sequencing on an Illumina sequencer.

181

### 182 **Nanopore MinION library preparation and sequencing**

183 Genomic DNA (1.5µg) was end-repaired (NEBnext ultra II end repair kit, New England  
184 Biolabs, MA, USA), cleaned up with 1x AmPure beads (Beckmann Coulter,USA). Adapter  
185 ligation were performed for 20 minutes using NEB blunt/ TA ligase (New England Biolabs,  
186 MA, USA). Library mix were cleaned up using 0.4X AmPure beads (Beckmann Coulter, USA)  
187 and eluted in 25 µl of elution buffer. Eluted Library were used for sequencing. Whole genome

188 library were prepared by using ligation sequencing kit SQK-LSK108-Oxford Nanopore  
189 Technology (ONT) from Oxford Nanopore Technology. Sequencing were performed on  
190 MinION Mk1b (Oxford Nanopore Technologies, Oxford, UK) using SpotON flow cell (FLO-  
191 MIN106) in a 48hr sequencing protocol on MinKNOW 1.1.20 from ONT.

### **Illumina raw data QC and processing**

194 The Illumina reads were de-multiplexed using Illumina bcl2fastq. The Illumina generated raw  
195 data for genomic libraries was quality checked using FastQC (Andrews, S., 2010). The paired-  
196 end Illumina reads were processed for clipping the adapter and low-quality bases using  
197 customized script which retains minimum 70% bases/reads with Phred score ( $Q \geq 30$  in each  
198 base position) with a read length of 50 bp. The MP libraries were trimmed for adapter and low-  
199 quality base trimming from the 3'-end using PLATANUS internal trimmer (Kajitani, R., et al.).

### **Nanopore reads base calling and processing**

202 Base calling was performed using Metrichor V.2.43.1 is a cloud based analysis tool provided  
203 by Oxford Nanopore Technology software suite. The Nanopore reads were processed using  
204 Poretools (Loman, NJ., et al.) for converting fast5 files to fasta format. For further  
205 quantification and analysis the 2D reads or 1D high quality reads were selected for further  
206 assembly.

### ***De novo* genome assembly and genome size estimation**

209 The quality checked Nanopore reads were error-corrected using Illumina PE reads. For error-  
210 correction the Illumina PE-reads were aligned to the Nanopore reads by using BWA aligner  
211 (Li, H., et al.). The paired-end reads were assembled using Abyss (Birol, I., et al.) followed by  
212 contig extension using Nanopore reads using SSPACE-LongRead (Boetzer, M., et al.). Super

1 scaffolding of the assembled scaffold was performed using SSPACE (Boetzer, M., et al.) and  
2 PLATANUS using the Nanopore and Matepair data. Final draft genome resulted after gap  
3 closure by GAPCLOSER and PLATANUS gap\_close tool using Illumina data. The genome  
4 size was estimated using a k-mer distribution plot using JELLYFISH (Marcais, G., et al.). The  
5 repetitive elements were identified in the final assembled draft genome using Repeat Masker  
6 tool. The draft genome was hardmasked by using reference genomic repeats of *G. gallus*. The  
7 assembly and annotation workflow overview has been represented as Figure 2.  
8  
9  
10  
11  
12  
13  
14  
15  
16  
17  
18

### 19 **Simple sequence repeats prediction**

20 Final assembled scaffolds were analysed for Simple Sequence Repeats (SSR) identification.  
21  
22 SSRs like the di, tri, tetra, penta and hexa-nucleotide repeats in the genome were obtained using  
23  
24 MISA (Version 1.0.0).  
25  
26  
27  
28  
29  
30

### 31 **Genome prediction and annotation**

32 Gene models was predicted on a hard masked draft genome, where the repetitive elements in  
33  
34 the draft genome were masked using genomic repeats of *G. gallus* with Repeatmasker tool and  
35  
36 further genes were predicted using AUGUSTUS with *G. gallus* as a reference model. The  
37  
38 predicted proteins were annotated by using BLASTP (Altshul, S., et al.) against all Avian  
39  
40 sequences downloaded from UniProt Protein Database.  
41  
42  
43  
44  
45  
46  
47  
48

### 49 **Pathway Analysis of the draft genome**

50 The predicted proteins were searched against the KEGG-KAAS server (Moriya, Y., et al.) for  
51  
52 pathway analysis. *G. gallus* (chicken), *Meleagris gallopavo* (turkey), *Taeniopygia guttata*  
53  
54 (zebra finch), *Falco peregrinus* (peregrine falcon) were used as reference organism for  
55  
56  
57  
58  
59  
60  
61  
62  
63  
64  
65



237 pathway identification. The EuKaryotic Orthologous Groups (KOGs) were predicted using  
238 homology based approach.

239

### 240 **Mitochondrial genome assembly and annotation**

241 The generated scaffolds from the draft assembly were aligned against the *P. cristatus*  
242 mitochondria genome and the mapped reads were filtered and stitched using ABACUS  
243 software using the same reference (Zhou, TC., et al.). Further gap closure were performed with  
244 3-7kb MP reads to generate an complete assembled mitochondrial genome. MITOS (Bernt, M.,  
245 et al.) was used for gene annotation. Circular plot generated using GenomeVx  
246 (<http://wolfe.ucd.ie/GenomeVx/>) representing the localization of the gene in the assembled  
247 mitochondrial genome.

248

### 249 **Phylogenetic tree construction**

250 The assembled Peacock mitochondrial genome was searched against 695 avian mitochondrial  
251 genomes downloaded from NCBI. Based on the Blast-N homology results (with query  
252 coverage > 100, subject coverage > 95, % identity >85 and with 1% gaps allowed in the  
253 sequences). 51 mitochondrial genome sequences along with our assembled mitochondrial  
254 genome were filtered. Multiple sequence alignment with default parameters were performed  
255 using MUSCLE global sequence aligner. Phylogenetic trees were constructed using IQ-TREE  
256 version 1.5.6 ([www.iqtree.org](http://www.iqtree.org)). The parameters used for phylogenetic tree construction were  
257 ultrafast bootstrap (UFBoot, using the `-bb` option of 1000 replicates), and a standard  
258 substitution model (`-m MFP`) was given for tree generation. The generated trees from IQ-TREE  
259 tool were visualized using Figtree (<http://tree.bio.ed.ac.uk/software/figtree/>) and the Brach-  
260 support values were recorded from the output “.treefile”. The trees were modified for better  
261 visualization under Trees section increasing order nodes were applied.

262

1  
2 **263 Protein domain analysis**

3  
4  
5 264 Predicted proteins from Peacock, Chicken and Turkey with sequence length greater than 100  
6  
7 265 amino acids were considered for protein domain analysis. All the protein sequences from each  
8  
9  
10 266 organism were searched against Pfam-A database using Pfam scan for protein domain  
11  
12 267 identification.

13  
14  
15 268

16  
17 **269 Avian protein families**

18  
19 270 The protein sequences of 48 avian genomes was downloaded from the link  
20  
21  
22 271 <http://avian.genomics.cn/en/jsp/database.shtml> apart from the predicted proteins of the draft  
23  
24 272 genome. Sequences greater than 100 amino acids from all the avian genomes were filtered and  
25  
26  
27 273 concatenated to a single fasta file. These sequences were clustered using CD-HIT (Fu, L., et  
28  
29 274 al.) with 90% alignment coverage for the shorter sequence with a length difference cutoff of  
30  
31  
32 275 0.9. The single copy ortholog gene family present across all organisms and genes unique to  
33  
34 276 peacock were filtered and annotated.

35  
36 277

37  
38  
39 **278 Genome conservation analysis**

40  
41 279 The assembled draft genome was aligned against the *G. gallus* genome using Chromosomer  
42  
43  
44 280 tool. Draft chromosomes were constructed based on alignment between fragments (scaffolds)  
45  
46 281 using a reference genome. These reordered assembled genome was aligned against the Chicken  
47  
48  
49 282 genome using LAST aligner with NEAR (finding short-and-strong (near-identical)  
50  
51 283 similarities.) parameter allowing for substitution and gap frequencies leading to the  
52  
53  
54 284 identification of orthologs. These query mapped regions were filtered with greater than 1% of  
55  
56 285 the maximum length for visualization using Circos.

57  
58 286

287

288 **Results**

289 **DNA Sequencing data**

290 Five libraries of 150 bp paired-end from Illumina HiSeq technology were generated. The short-  
291 insert reads of 489,114,747 accounted to genome coverage of 146.7X and long-insert reads of  
292 302,884,819 sequences was about 90.9X coverage with a total coverage of 236X. Sequencing  
293 of three mate-pairs of 3-5Kb, 5-7Kb of and 7-10Kb yielded 72,915,033, 47,440,144 and  
294 36,464,628 reads respectively with an approximate coverage of 21.9, 14.2 and 10.9  
295 respectively, with a total of 156 million reads of 47X coverage. Oxford Nanopore technology  
296 was used to generate 366,323 long reads having of 2,398,560,283 bp with coverage of 2.3X.  
297 The complete sequencing was generated to a depth of ~287X from Illumina and Nanopore  
298 platforms. The coverage was based on assuming the peacock genome size of about 1 Gb (Table  
299 S1).

301 **Genome assembly**

302 The assembly was performed on Illumina reads with Abyss *de novo* assembler that resulted in  
303 ~932 Mb (mega base) of genome with an N50 of 1639 bp. The extension of the contigs were  
304 performed with Nanopore reads which generated scaffolds with N50 of 14,748 bp. Super  
305 scaffolding of the assembled scaffold was performed using SSPACE and PLATANUS with  
306 MP libraries that generated ~916 Mb genome with the N50 value of 168,140bp. The final gap  
307 closer was executed using GAPCLOSER program with MP and PE-LI libraries which  
308 generated a draft genome of 1.02 GB (giga base). The draft genome assembly of *Pavo cristatus*  
309 consists of 179,346bp scaffolds, with a N50 of 189,886bp with 37 scaffolds having sequence  
310 length  $\geq 1$ Mbp. Contigs above 5000 bp have covered a genome of ~0.915 Mb with N50 0.23  
311 Mb. In the assembled genome there were ~0.4% of non ATGC characters (Table 1).

312

1  
2  
3  
4 313 Complete mitochondrial genome of 16699 bp was obtained. Total of 22 tRNA, tow rRNA and  
5  
6 314 13 protein coding genes were identified in the assembled genome (Fig. 3a). A 100% similarity  
7  
8 315 was observed with the preiously published Peacocks mitochondrial genome (Fig. S1a and S1b).  
9

10  
11  
12 316

13  
14 317 **Transposable Elements (TE)**  
15

16  
17 318 In the bird genome a total of 75,315,566 bp (7.3% of the genome) was predicted to have 5.5%  
18  
19 319 of Retroelements (with SINEs 0.08% and LINEs 4.71%), 6.25 % total interspersed repeats with  
20  
21 320 0.84 % simple repeats and 0.21% low complexity regions. The DNA transposons identified in  
22  
23 321 the genome was 0.71% (Table S2).  
24  
25

26 322

27  
28  
29 323 **Protein coding gene annotation**  
30

31 324 A total of 23,153 proteins were predicted in the assembled draft genome using AUGUSTUS.  
32  
33 325 Among them 95% predicted genes were annotated against the other Aves proteins. The 21,854  
34  
35 326 annotated proteins showed top similarity to species *Gallus gallus* (Chicken) with 11,398  
36  
37 327 proteins, *Meleagris gallopavo* (Common turkey) with 4059 proteins, *Amazona aestiva* (Blue-  
38  
39 328 fronted Amazon parrot) with 1352 proteins and *Anas platyrhynchos* (Mallard) (*Anas boschas*)  
40  
41 329 with 849 proteins. Thirteen species had about 100 to 400 annotated proteins. The remaining  
42  
43 330 proteins were in the range of 1 to <100 proteins in about 62 species. From the annotations a  
44  
45 331 total of 13,161 proteins showed similarity to uncharacterized protein annotation and some of  
46  
47 332 the over represented proteins were Tyrosine-protein kinase, Sulfotransferase, Phosphoinositide  
48  
49 333 phospholipase C, Tetraspanin, Phospholipid-transporting ATPase, Olfactory receptor,  
50  
51 334 Polypeptide N-acetylgalactosaminyltransferase, Transporter, Keratin, Hexosyltransferase,  
52  
53 335 Protein Wnt, Kinesin-like protein, Gap junction protein, Claudin, POU domain protein,  
54  
55  
56  
57  
58  
59  
60  
61  
62  
63  
64  
65

336 Sodium/hydrogen exchanger, Phospholipid-transporting ATPase, Histone-lysine N-  
337 methyltransferase and others (Table S3). The gene ontology annotations showed to have Gene  
338 Ontology (GO) descriptions for 18,295 proteins. Among them, 14,490 proteins have Molecular  
339 Function; 11,679 have Biological Process and 13,736 proteins have Cellular Component as  
340 functional categories.

341 About 17.7% of proteins were found to have pathway information against the KEGG database  
342 (Table S4). Some of the overrepresented annotations were Kinases like MAPK (mitogen-  
343 activated protein kinase); JNK (c-Jun N-terminal kinase); RAF (RAF proto-oncogene  
344 serine/threonine-protein kinase); AKT (RAC serine/threonine-protein kinase); protein kinases  
345 and different GTPases.

346 Proteins searched against the KOG annotations showed a total of 20,937 proteins having  
347 annotations. Among them, the most abundant annotations include Zn-finger, transmembrane  
348 receptor, ubiquitin ligase, Leucine rich repeat, Cadherin repeats, Serine/threonine protein  
349 kinase, Collagens, Ankryin repeat, Fibrillins, Voltage-gated Ca<sup>2+</sup> channels and Hormone  
350 receptors (Table S5). The peacock proteins when searched against the human proteins showed  
351 expansions in ontologies for cell morphogenesis, neuronal projection and development and  
352 GTPases (Table S10 and Fig. S4).

353

354

### 355 **Simple sequence repeats**

356 A total of 399,493 SSRs were identified from the peacock genome assembly. The largest  
357 fraction of SSRs identified were mononucleotide (60.04%), followed by tetra nucleotide  
358 (26%), di nucleotide (8.51%), tri nucleotide (4.31%), penta nucleotide (1.03%) and finally hexa  
359 nucleotide (0.13%). Among the SSRs identified, A (49.2%) and T (44.9%) accounted for  
360 94.1% of the mono-nucleotide repeats. AT (23.8%), TA (16.5%), TG(13.7%), AC(10.6%) and

361 CA (10.32%) accounted for 75% of the di-nucleotide repeats. while TTG (9.9%), AAT (9.6%),  
362 AAC (9.4%), TTA (7.1%), ATT (4.5%), TAA (3.5%), CAA (3.1%) and GGA (2.69%)  
363 accounted for 49.7% of the tri-nucleotide repeats (Table S6).

364

### 365 **Avian protein family analysis**

366 A total of 748,544 protein sequences from 49 avian species have 653,497 protein sequences of  
367 length above 100 amino acids (Table S7A). A total of 240,853 gene clusters were generated of  
368 which 41 gene clusters had single copy orthologs in all avian species (Table S7B and Table  
369 S7C). With the above stringent cutoff we observed 15,913 gene clusters were unique to  
370 peacock species.

371

### 372 **Phylogeny and Genome comparisons**

373 The phylogeny of 51 mitochondrial genome sequences along with peacock genome showed a  
374 clade consisting of *Pavo* species and *Gallus* (red junglefowl, Sri Lankan junglefowl, grey  
375 junglefowl, grey junglefowl), *Bambusicola* (Mountain Bamboo-partridge, Chinese bamboo  
376 partridge) and *Francolinus* (Chinese francolin). It can be observed many species were  
377 distributed in two different clades where 34 species were found in one clade and five species  
378 in other clade. Some of the endemic or native bird species like *Arborophila ardens*, *Acryllium*  
379 *vulturinum* and *Numida meleagris* were found as clear outgroup of species in this study (Fig.  
380 3b).

381 Predicted proteins from Peacock, Chicken and Turkey were searched for protein domain  
382 analysis. 81% of the Pfams were common among the three species. About 94%, 98.4% and  
383 99.7% predicted Pfam domains were identified in Peacock, Chicken and Turkey respectively.  
384 There were 255, 69 and 14 Pfam domains found to be unique in the species mentioned above  
385 respectively (Fig. 4).

1 386 The assembled Peacock genome was reordered for pseudo chromosomes generation against  
2 387 the simple repeat masked Chicken genome (1.21 GB, Warren, WC., et al.) using Chromosomer  
3  
4 388 which generated a overall reordered Peacock genome of about 597MB. The right side of the  
5  
6  
7 389 image represents the reference genome and left side of the image represents the Peacock  
8  
9  
10 390 genome (Fig. 5).

11 391

## 14 392 **Conclusions**

16  
17 393 Third generation sequencing in avian genomics where long reads having the substantiality to  
18  
19 394 improve genome assembly will benefit understanding the organisms in the structurally  
20  
21  
22 395 complex regions having repeat elements and isoforms in the genome (Goodwin, S., et al.).  
23  
24 396 Using a combination of short reads of different insert sizes as well as mate pair reads generated  
25  
26  
27 397 from Illumina technology along with long reads from Oxford Nanopore, we obtained an  
28  
29 398 improved assembly and a draft genome of the Indian Blue Peacock (*Pavo cristatus*). In  
30  
31  
32 399 comparison to other avian genomes (Zhang, G., et al.), the current 290X sequencing depth  
33  
34 400 obtained from our study is one of the highest. With a N50 of 0.23Mb, we presented here a  
35  
36 401 reasonably reliable draft genome for the peacock species. The inclusion of Nanopore reads  
37  
38  
39 402 366,323 for scaffolding followed by subsequent gap-closing using Illumina data led to a 26.2%  
40  
41 403 reduction in the number of scaffolds and a 50.65% and 115% increase in the scaffold and contig  
42  
43  
44 404 N50, respectively. With only 2.3X of long reads, a significant improvement in the assembly  
45  
46 405 was observed. On the contrary, the assembly contained less than 0.4% of unknown nucleotides,  
47  
48  
49 406 which is very low for a draft assembly. With the addition of more long reads along with  
50  
51 407 transcriptomic sequencing along with scaffolding and/or gap closure tools, further  
52  
53 408 improvement in the assembly can be achieved.

54 409

1  
2  
3  
4  
5  
6  
7  
8  
9  
10  
11  
12  
13  
14  
15  
16  
17  
18  
19  
20  
21  
22  
23  
24  
25  
26  
27  
28  
29  
30  
31  
32  
33  
34  
35  
36  
37  
38  
39  
40  
41  
42  
43  
44  
45  
46  
47  
48  
49  
50  
51  
52  
53  
54  
55  
56  
57  
58  
59  
60  
61  
62  
63  
64  
65

410 Peacock seems to defy the Darwinian laws of natural selection. These concern were raised by  
411 no other than Darwin himself. Hence, he proposed the theory of the sexual selection where the  
412 female can choose for a male with a certain phenotypic feature such as brilliant color or a long  
413 tail (Burgess, S.). Peacock's brilliantly colored long tail feathers seems to evolve at the cost  
414 of finding its female partner thereby contributing its beneficial genes, even at the cost of  
415 making itself venerable to predators. A female peafowl in turn tends to choose the mate with  
416 the largest and decorated plumage, which indirectly reflects its healthiness and capacity to  
417 wade off potential competitors thereby selecting the most suitable male. Peacocks beautiful  
418 feathers with it all its artistry surely provides it with an advantage to impress the females  
419 (Dakin, R., et al.). Understanding the formation of beautiful feathers from the genomic context  
420 will help in resolving several evolutionary theories on sexual selection that have been discussed  
421 on this species.

422 Pigment particles are embedded into the newly grown peacock feathers during the molting  
423 season which seems to absorb light of selective wavelength there by imparting to the color of  
424 the plumage (Mercedes Foster, Rennee Riedler, et al.) Pigment morphogenesis in *Gallus* has  
425 been reported by a process of melanoblasts migration and colonization into feather bud where  
426 they differentiate to produce the pigment, melanin (Kelsh, RN., et al.). The molecular  
427 mechanisms that control the pigment cell migration have been narrowed down to proteins Kit1  
428 and FGFs which maintain the melanoblasts migration to feathers. Kit and FGF proteins have  
429 also been identified in our current study (Table S3). Understanding of these proteins in the  
430 patterned formation will help decode the pigment pattern morphology in peacocks. These  
431 pigmented patterns play a role in communication, choice of mate and in some species it can  
432 help in camouflage (Burgess, S)

433 It has been observed that the variations in the genome size among bird species are very low  
434 (Table S8). The genome complexities of a species are influenced by the Transposable elements  
435 (TE) that are believed to play a crucial role (Kapsuta, A., et al.). The long read sequences have  
436 significantly helped in resolving the TEs in genome quality and assembly. Peacock genome  
437 comparisons with Turkey and Chicken have showed closeness to the Chicken species. The



1 438 mitochondrial phylogeny also revealed similar findings. Homology searches have shown  
2  
3 439 several important gene family expansions such as Kinases, Zn finger proteins, GTPases and  
4  
5 440 others. Their roles in biology, development and evolution of the Peacocks have to be further  
6  
7 441 explored.

8  
9 442 To summarize, we have assembled the *Pavo* genome using Illumina and Oxford nanopore  
10  
11 443 technology. The genome information can be valued and explored by avian enthusiasts to further  
12  
13 444 understand about this bird. Though not critically endangered yet, in India, peafowl population  
14  
15 445 is surely at a decline in the wild due to massive deforestation and habitat loss. Thus is further  
16  
17 446 compounded by increased poaching for meat and feathers. Our genome sequencing initiative  
18  
19 447 of *Pavo cristatus* is not just only from a conservational viewpoint, but also to preserve a  
20  
21 448 heritage associated with this bird that runs through centuries and that bears a strong attachment  
22  
23  
24 449 to the national psyche.  
25  
26  
27  
28

29 450  
30  
31  
32  
33  
34  
35  
36  
37  
38  
39  
40  
41  
42  
43  
44  
45  
46  
47  
48  
49  
50  
51  
52  
53  
54  
55  
56  
57  
58  
59  
60  
61  
62  
63  
64  
65

1  
2  
3  
4  
5  
6  
7  
8  
9  
10  
11  
12  
13  
14  
15  
16  
17  
18  
19  
20  
21  
22  
23  
24  
25  
26  
27  
28  
29  
30  
31  
32  
33  
34  
35  
36  
37  
38  
39  
40  
41  
42  
43  
44  
45  
46  
47  
48  
49  
50  
51  
52  
53  
54  
55  
56  
57  
58  
59  
60  
61  
62  
63  
64  
65

451 **Availability of supporting data**

452 Supplementary data contains, read statistics, annotation, repeats identification, orthology  
453 analysis, mitochondria assembly and annotation. Figures, Gene ontology. DNA and library  
454 preparation protocols.

455

456 **Raw Data in SRA**

457 Raw reads (Illumina and Nanopore) are available in the Sequence Read Archive (SRA), and  
458 the Whole Genome Shotgun project has been deposited at GenBank under SRA Submission  
459 ID: SUB3108024, Bioproject: PRJNA413288 and Biosamples SAMN07739105 :  
460 SKPea2016\_SI, SAMN07739104 : SKPea2016\_LI, SAMN07739101 : FPL\_3\_5KB,  
461 SAMN07739102 : FPL\_5\_7KB, SAMN07739103 : FPL\_7\_10KB and SAMN07739107 :  
462 FPL\_Nano.

463

464 **Competing interests**

465 The author(s) declare that they have no competing interests.

466

467 **Authors contributions**

468 RD, AS, KP performed wet lab experiments; RD designed work plan, experiments and  
469 logistics; SS, VR, KP SG IM and AR assisted with the work; RS provided samples from bird;  
470 BR, SK performed data analysis and interpretation; SK, BR, RD drafted the manuscript and  
471 SK overseen the whole project.

472

473

474

475

476 **Acknowledgements**

1  
2 477 Department of Biochemistry, AIIMS, New Delhi for providing space and infrastructure to carry  
3  
4  
5 478 on the work. RD for providing partial funding. Kritika Tripathi for inputs with manuscript  
6  
7 479 editing. Raja and Sudha from Genotypic Technology Pvt. Ltd for providing sequencing  
8  
9  
10 480 services and also Deepti, Shalini, Nagu, Abhi and Manish. BR acknowledges IUT 34-4.

11  
12 481

13  
14  
15 482  
16  
17  
18  
19  
20  
21  
22  
23  
24  
25  
26  
27  
28  
29  
30  
31  
32  
33  
34  
35  
36  
37  
38  
39  
40  
41  
42  
43  
44  
45  
46  
47  
48  
49  
50  
51  
52  
53  
54  
55  
56  
57  
58  
59  
60  
61  
62  
63  
64  
65

483 **Tables**

484 Table 1. *De novo* assembly statistics of the Peacock genome.

| Description      | Contigs   | Nanopore Scaffold | Super Scaffolds | GapClosed  | >1000 Kb  | >5000 Kb  |
|------------------|-----------|-------------------|-----------------|------------|-----------|-----------|
| Contigs          | 685241    | 281272            | 179346          | 179346     | 34181     | 15026     |
| Maximum Length   | 49159     | 251510            | 2390121         | 2488982    | 2488982   | 2488982   |
| Minimum Length   | 300       | 5                 | 265             | 265        | 1000      | 5000      |
| Average Length   | 1360      | 3250              | 5111            | 5729       | -         | -         |
| Total Length     | 932162464 | 914363908         | 916720956       | 1027551907 | 954483822 | 915373606 |
| Length >= 100 bp | 685241    | 281271            | 179346          | 179346     | 34181     | 15026     |
| Length >= 200 bp | 685241    | 281271            | 179346          | 179346     | 34181     | 15026     |
| Length >= 500 bp | 616120    | 186433            | 93727           | 93727      | 34181     | 15026     |
| Length >= 1 Kbp  | 363428    | 104479            | 34168           | 34181      | 34181     | 15026     |
| Length >= 10 Kbp | 1591      | 24748             | 9249            | 10311      | 10311     | 10311     |
| Length >= 1 Mbp  | 0         | 0                 | 27              | 37         | 37        | 37        |
| Non-ATGC #       | 350325    | 42696911          | 49169831        | 4034372    | 4032567   | 3978757   |
| Non-ATGC %       | 0.038     | 4.67              | 5.364           | 0.393      | 0.422     | 0.435     |
| N50 value        | 1639      | 14748             | 168140          | 189886     | 218023    | 232312    |

485

486

487 **Figure legend**

488 **Figure 1.** The beautiful and charismatic photo of Indian blue peacock (*Pavo cristatus*) bird.

489 **Figure 2.** Detailed workflow for *de novo* genome assembly and annotation.

490 **Figure 3a.** Circular representation of Peacock mitochondrial genome with genes predicted.

491 **Figure 3b.** Phylogenetic tree generated from mitochondrial genome from 52 different avian  
species.

493 **Figure 4.** Circular image of the assembled peacock genome aligned against the *G. gallus*  
genome using Chromosomer tool. Draft chromosomes were generated by similarity between  
scaffolds which were arranged on the reference chicken genome. Circos was used for  
visualization.

497 **Figure 5.** Venn diagram showing common and unique Protein family domains (Pfam) between  
Peacock, Chicken and Turkey proteins.

499

500 **References:**

1  
2 501 Gadagkar, R., 2003. Is the peacock merely beautiful or also honest?. Current Science, 85(7),  
3  
4 502 pp.1012-1020.

5 503  
6  
7 504 Kushwaha, S., and Kumar, A. 2016. A Review on Indian Peafowl (*Pavo cristatus*) Linnaeus,  
8  
9 505 1758. Journal of Wildlife and Research, 4, 42-59.

10 506  
11  
12 507 Kadgaonkar, Shivendra B. 1993. The peacock in ancient Indian art and literature. Bulletin of  
13  
14 508 the Deccan College Research Institute, vol. 53, pp. 95–115. JSTOR,  
15  
16 509 www.jstor.org/stable/42936434.

17 510  
18  
19 511 Brickle, N. 2002. Habitat use, predicted distribution and conservation of green peafowl (*Pavo*  
20  
21 512 *muticus*) in Dak Lak Province, Vietnam. Biological Conservation, 105: 189-197.

22 513  
23  
24 514 Jackson, C. 2006. Peacock. London: Reaktion Books Ltd.

25 515  
26  
27 516 Zhang, G., Jarvis, E. D., and Gilbert, M. T. P. 2014. A flock of genomes. Science 346, 1308–  
28  
29 517 1309.

30 518  
31  
32 519 International Chicken Genome Sequencing Consortium. 2004. Sequence and comparative  
33  
34 520 analysis of the chicken genome provide unique perspectives on vertebrate evolution. Nature,  
35  
36 521 432(7018), 695.

37 522  
38  
39 523 Kajitani, R., Toshimoto, K., Noguchi, H., Toyoda, A., Ogura, Y., Okuno, M., Yabana, M.,  
40  
41 524 Harada, M., Nagayasu, E., Maruyama, H. and Kohara, Y., 2014. Efficient de novo assembly  
42  
43 525 of highly heterozygous genomes from whole-genome shotgun short reads. Genome research,  
44  
45 526 24(8), pp.1384-1395.

46 527  
47  
48 528 Loman, N. J. and Quinlan, A. R. 2014. Poretools: a toolkit for analyzing nanopore sequence  
49  
50 529 data. Bioinformatics, 30(23), 3399-3401.

51 530  
52  
53 531 Li H. and Durbin R. 2009. Fast and accurate short read alignment with Burrows-Wheeler  
54  
55 532 Transform. Bioinformatics, 25:1754-60.

56 533

534 Birol, I., Jackman, S.D., Nielsen, C.B., Qian, J.Q., Varhol, R., Stazyk, G., Morin, R.D., Zhao,  
1 535 Y., Hirst, M., Schein, J.E. and Horsman, D.E., 2009. De novo transcriptome assembly with  
2 ABySS. *Bioinformatics*, 25(21), pp.2872-2877.  
3  
4 536  
5 537  
6  
7 538 Boetzer, Marten, and Walter Pirovano. 2014. SSPACE-LongRead: scaffolding bacterial draft  
8 genomes using long read sequence information. *BMC bioinformatics* 15.1: 211  
9 539  
10  
11 540  
12 541 Boetzer, M., Henkel, C.V., Jansen, H.J., Butler, D. and Pirovano, W., 2010. Scaffolding pre-  
13 assembled contigs using SSPACE. *Bioinformatics*, 27(4), pp.578-579.  
14 542  
15  
16 543  
17  
18 544 Marcais, G and Kingsford, C. 2011. A fast, lock-free approach for efficient parallel counting  
19 of occurrences of k-mers. *Bioinformatics* 27(6): 764-770.  
20 545  
21  
22 546  
23 547 Altschul, S.F., Gish, W., Miller, W., Myers, E.W. and Lipman, D.J., 1990. Basic local  
24 alignment search tool. *Journal of molecular biology*, 215(3), pp.403-410.  
25 548  
26  
27 549  
28  
29 550 Moriya, Y., Itoh, M., Okuda, S., Yoshizawa, A.C. and Kanehisa, M., 2007. KAAS: an  
30 automatic genome annotation and pathway reconstruction server. *Nucleic acids research*,  
31 551 35(suppl\_2), pp.W182-W185.  
32 552  
33  
34 553  
35  
36 554 Zhou, T.C., Sha, T., Irwin, D.M. and Zhang, Y.P., 2015. Complete mitochondrial genome of  
37 the Indian peafowl (*Pavo cristatus*), with phylogenetic analysis in phasianidae. *Mitochondrial*  
38 555 *DNA*, 26(6), pp.912-913.  
39  
40 556  
41  
42 557  
43 558 Bernt, M., Donath, A., Jühling, F., Externbrink, F., Florentz, C., Fritzsche, G., Pütz, J.,  
44 Middendorf, M. and Stadler, P.F., 2013. MITOS: improved de novo metazoan mitochondrial  
45 559 genome annotation. *Molecular phylogenetics and evolution*, 69(2), pp.313-319.  
46 560  
47  
48 561  
49  
50 562 Fu, L., Niu, B., Zhu, Z., Wu, S. and Li, W., 2012. CD-HIT: accelerated for clustering the next-  
51 563 generation sequencing data. *Bioinformatics*, 28(23), pp.3150-3152.  
52  
53  
54 564  
55  
56 565 Warren, W.C., Hillier, L.W., Tomlinson, C., Minx, P., Kremitzki, M., Graves, T., Markovic,  
57 C., Bouk, N., Pruitt, K.D., Thibaud-Nissen, F. and Schneider, V., 2016. A new chicken genome  
58 566  
59  
60  
61  
62  
63  
64  
65

567 assembly provides insight into avian genome structure. G3: Genes, Genomes, Genetics, pp.g3-  
1 568 116.  
2  
3 569  
4  
5 570 Goodwin, S., McPherson, J.D. and McCombie, W.R., 2016. Coming of age: ten years of next-  
6 generation sequencing technologies. Nature Reviews Genetics, 17(6), p.333.  
7 571  
8  
9 572  
10 573 Zhang, G., Li, C., Li, Q., Li, B., Larkin, D.M., Lee, C., Storz, J.F., Antunes, A., Greenwold,  
11 M.J., Meredith, R.W. and Ödeen, A., 2014. Comparative genomics reveals insights into avian  
12 574 genome evolution and adaptation. Science, 346(6215), pp.1311-1320.  
13 575  
14  
15 576  
16  
17 577 Burgess, S., 2001. The beauty of the peacock tail and the problems with the theory of sexual  
18 578 selection. Journal of Creation, 15(2), pp.94-102..  
19  
20  
21 579  
22  
23 580 Dakin, R. 2008. The role of the visual train ornament in the courtship of peafowl, *Pavo*  
24 581 *cristatus*. Masters Abstracts International, 47/03: 97.  
25  
26 582  
27  
28 583 Mercedes S Foster 1975. The overlap of molting and breeding in some birds. The Condor  
29 584 77:304-314.  
30  
31  
32 585  
33  
34 586 Renee Riedler, Christel Pesme, James Druzik, Molly Gleeson, Ellen Pearlstein The Journal of  
35 587 the American Institute of Conservation 2014  
36  
37  
38 588  
39  
40 589  
41  
42 590 Kelsh, R.N., Harris, M.L., Colanesi, S. and Erickson, C.A., 2009. Stripes and belly-spots—a  
43 591 review of pigment cell morphogenesis in vertebrates. Seminars in cell & developmental  
44 592 biology. Vol. 20, No. 1, pp. 90-104.  
45  
46  
47 593  
48  
49 594 Kapusta, A. and Suh, A., 2017. Evolution of bird genomes—a transposon's- eye view. Annals  
50 595 of the New York Academy of Sciences, 1389(1), pp.164-185.  
51  
52  
53 596  
54  
55 597  
56  
57 598 **Webservers:**  
58 599 FastQC : <http://www.bioinformatics.babraham.ac.uk/projects/fastqc/>  
59  
60 600 AUGUSTUS : <http://augustus.gobics.de/>  
61  
62  
63  
64  
65



601 PLATANUS : <http://platanus.bio.titech.ac.jp/>  
1  
2 602 ABACUS : <http://abacas.sourceforge.net/Manual.html>  
3  
4 603 MISA: <http://pgrc.ipk-gatersleben.de/misa/>  
5  
6 604 REPEATMASKER : <http://www.repeatmasker.org/>  
7  
8 605 KOGs : <https://genome.jgi.doe.gov/portal/help/kogbrowser.jsf>  
9  
10 606 KAAS : <http://www.genome.jp/tools/kaas/>  
11  
12 607 MITOS : <http://mitos.bioinf.uni-leipzig.de/>  
13  
14 608 MUSCLE : <https://www.drive5.com/muscle/>  
15  
16 609 PFAMSCAN : <https://www.ebi.ac.uk/seqdb/confluence/display/THD/PfamScan>  
17  
18 610 LAST : <http://last.cbrc.jp/>  
19  
20 611 CHROMOSOMER : <https://github.com/gtamazian/chromosomer>  
21  
22  
23  
24  
25  
26  
27  
28  
29  
30  
31  
32  
33  
34  
35  
36  
37  
38  
39  
40  
41  
42  
43  
44  
45  
46  
47  
48  
49  
50  
51  
52  
53  
54  
55  
56  
57  
58  
59  
60  
61  
62  
63  
64  
65

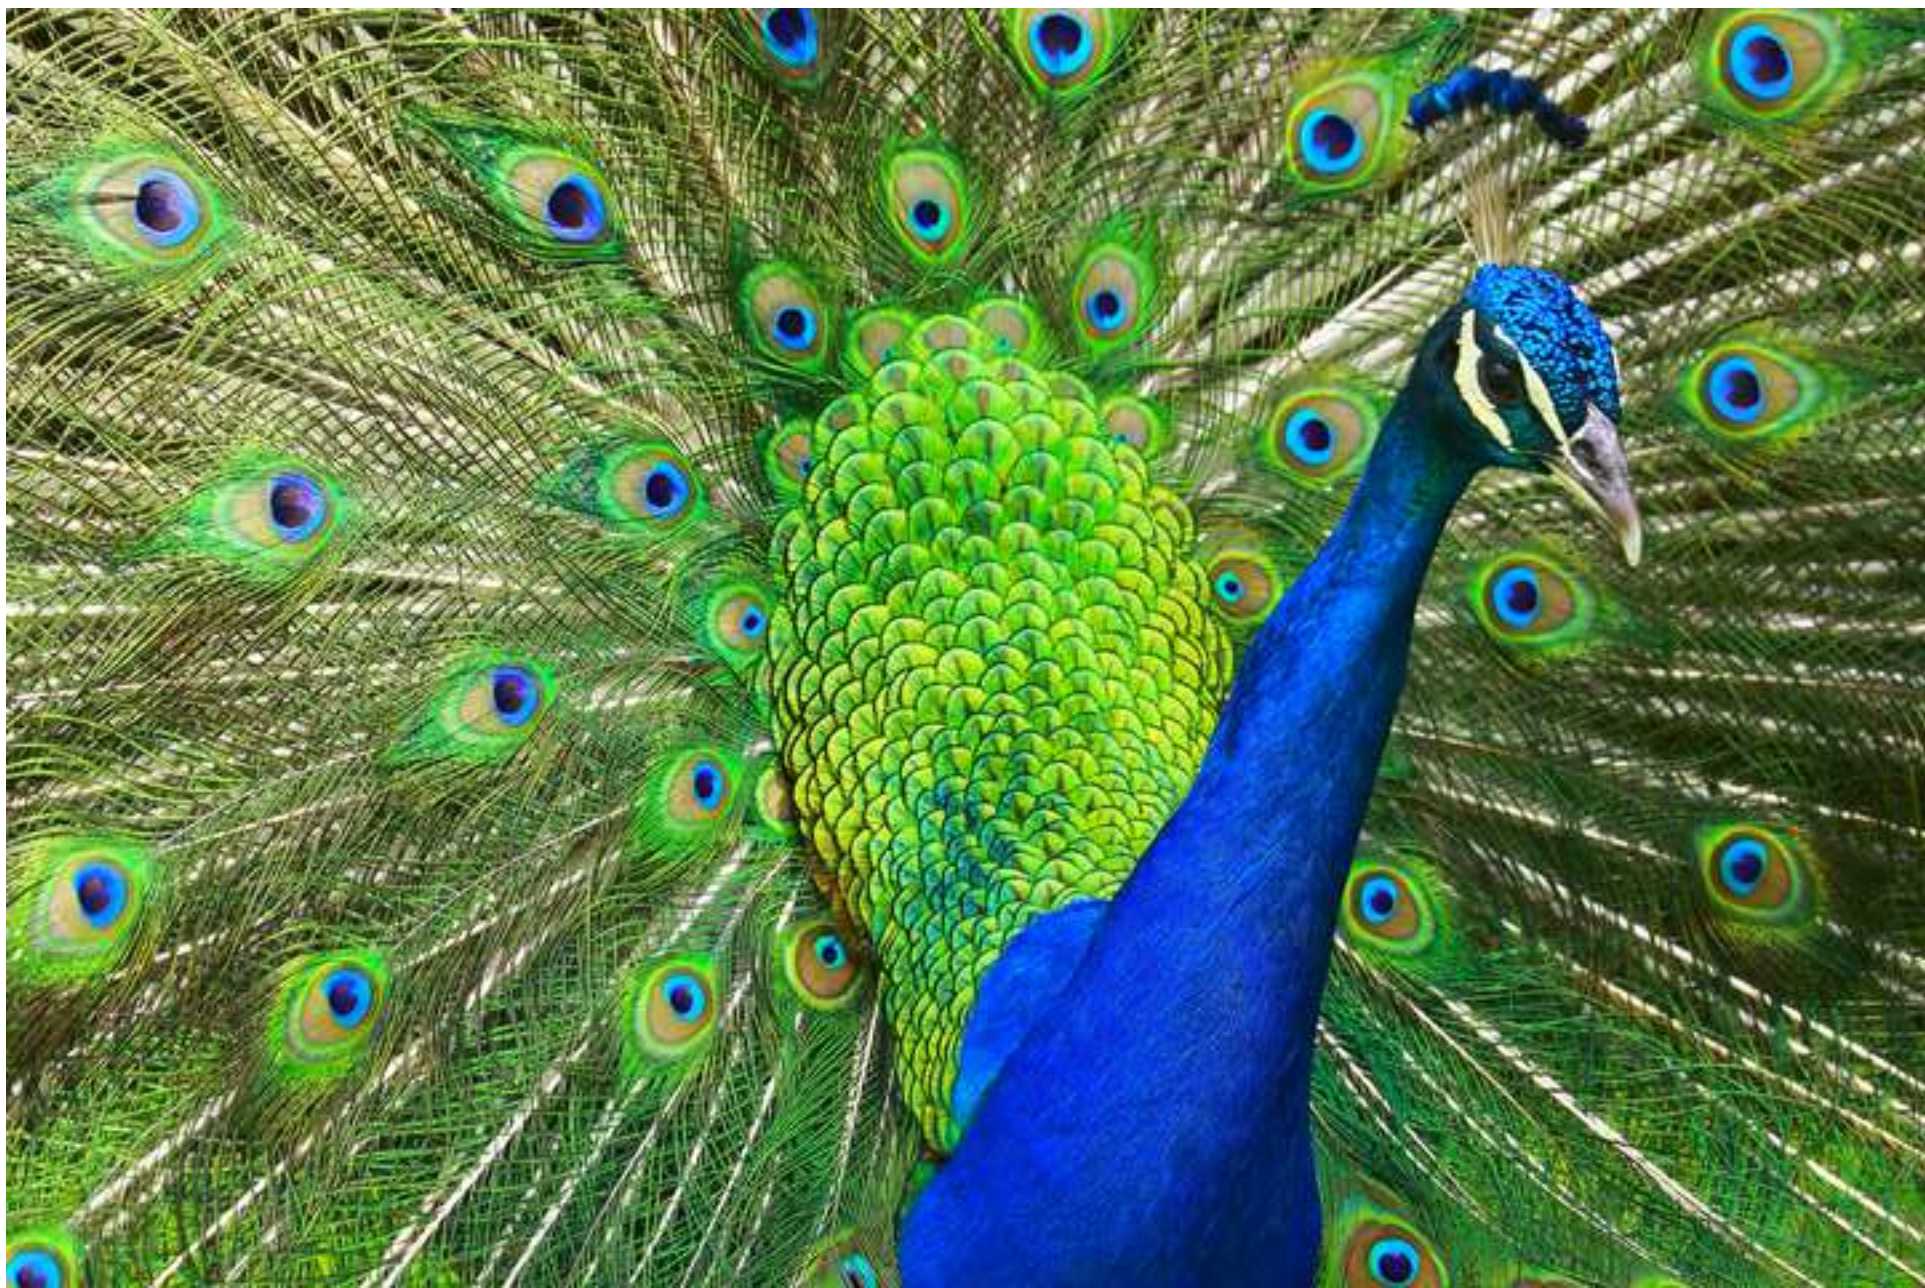

Figure 2

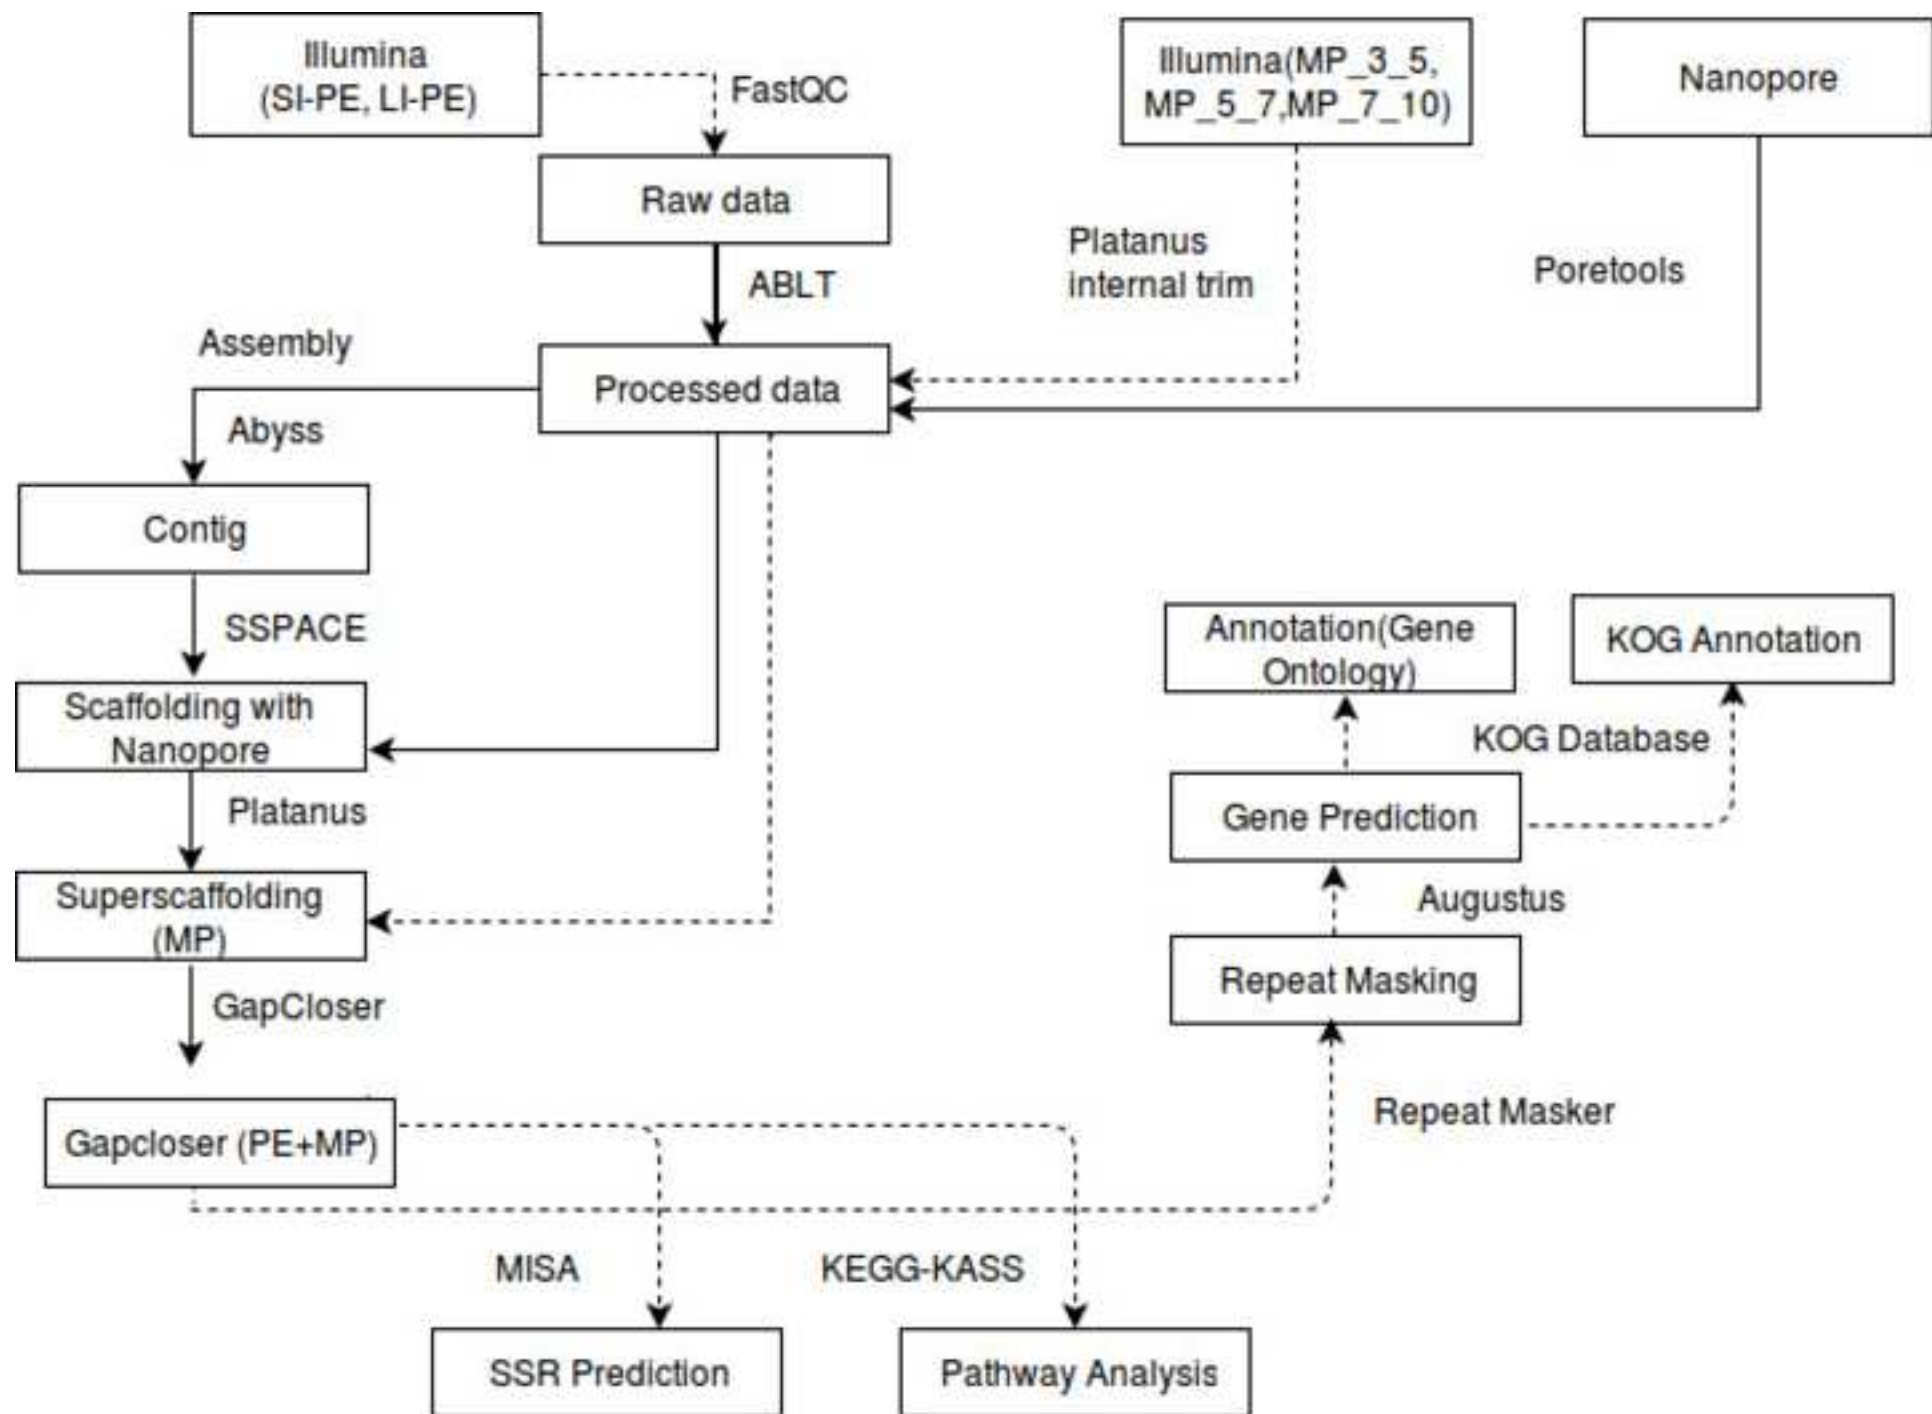

Figure 3a

[Click here to download Figure Fig 3a. Mitochondria genome with genes.pdf](#)

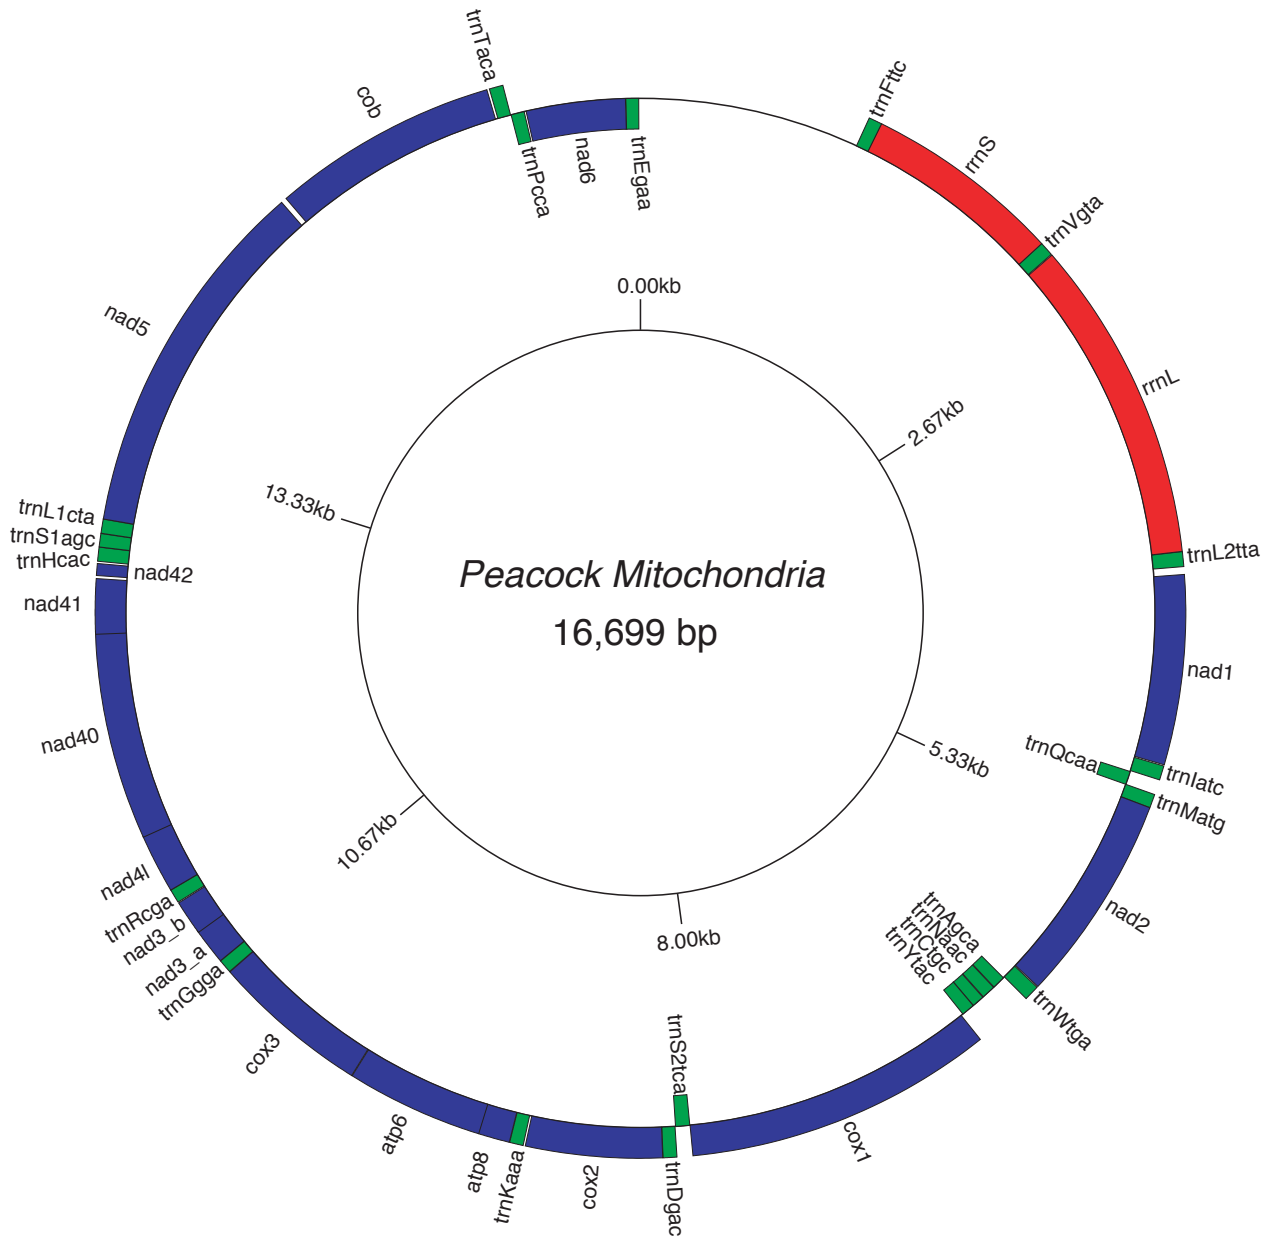

Figure 3b

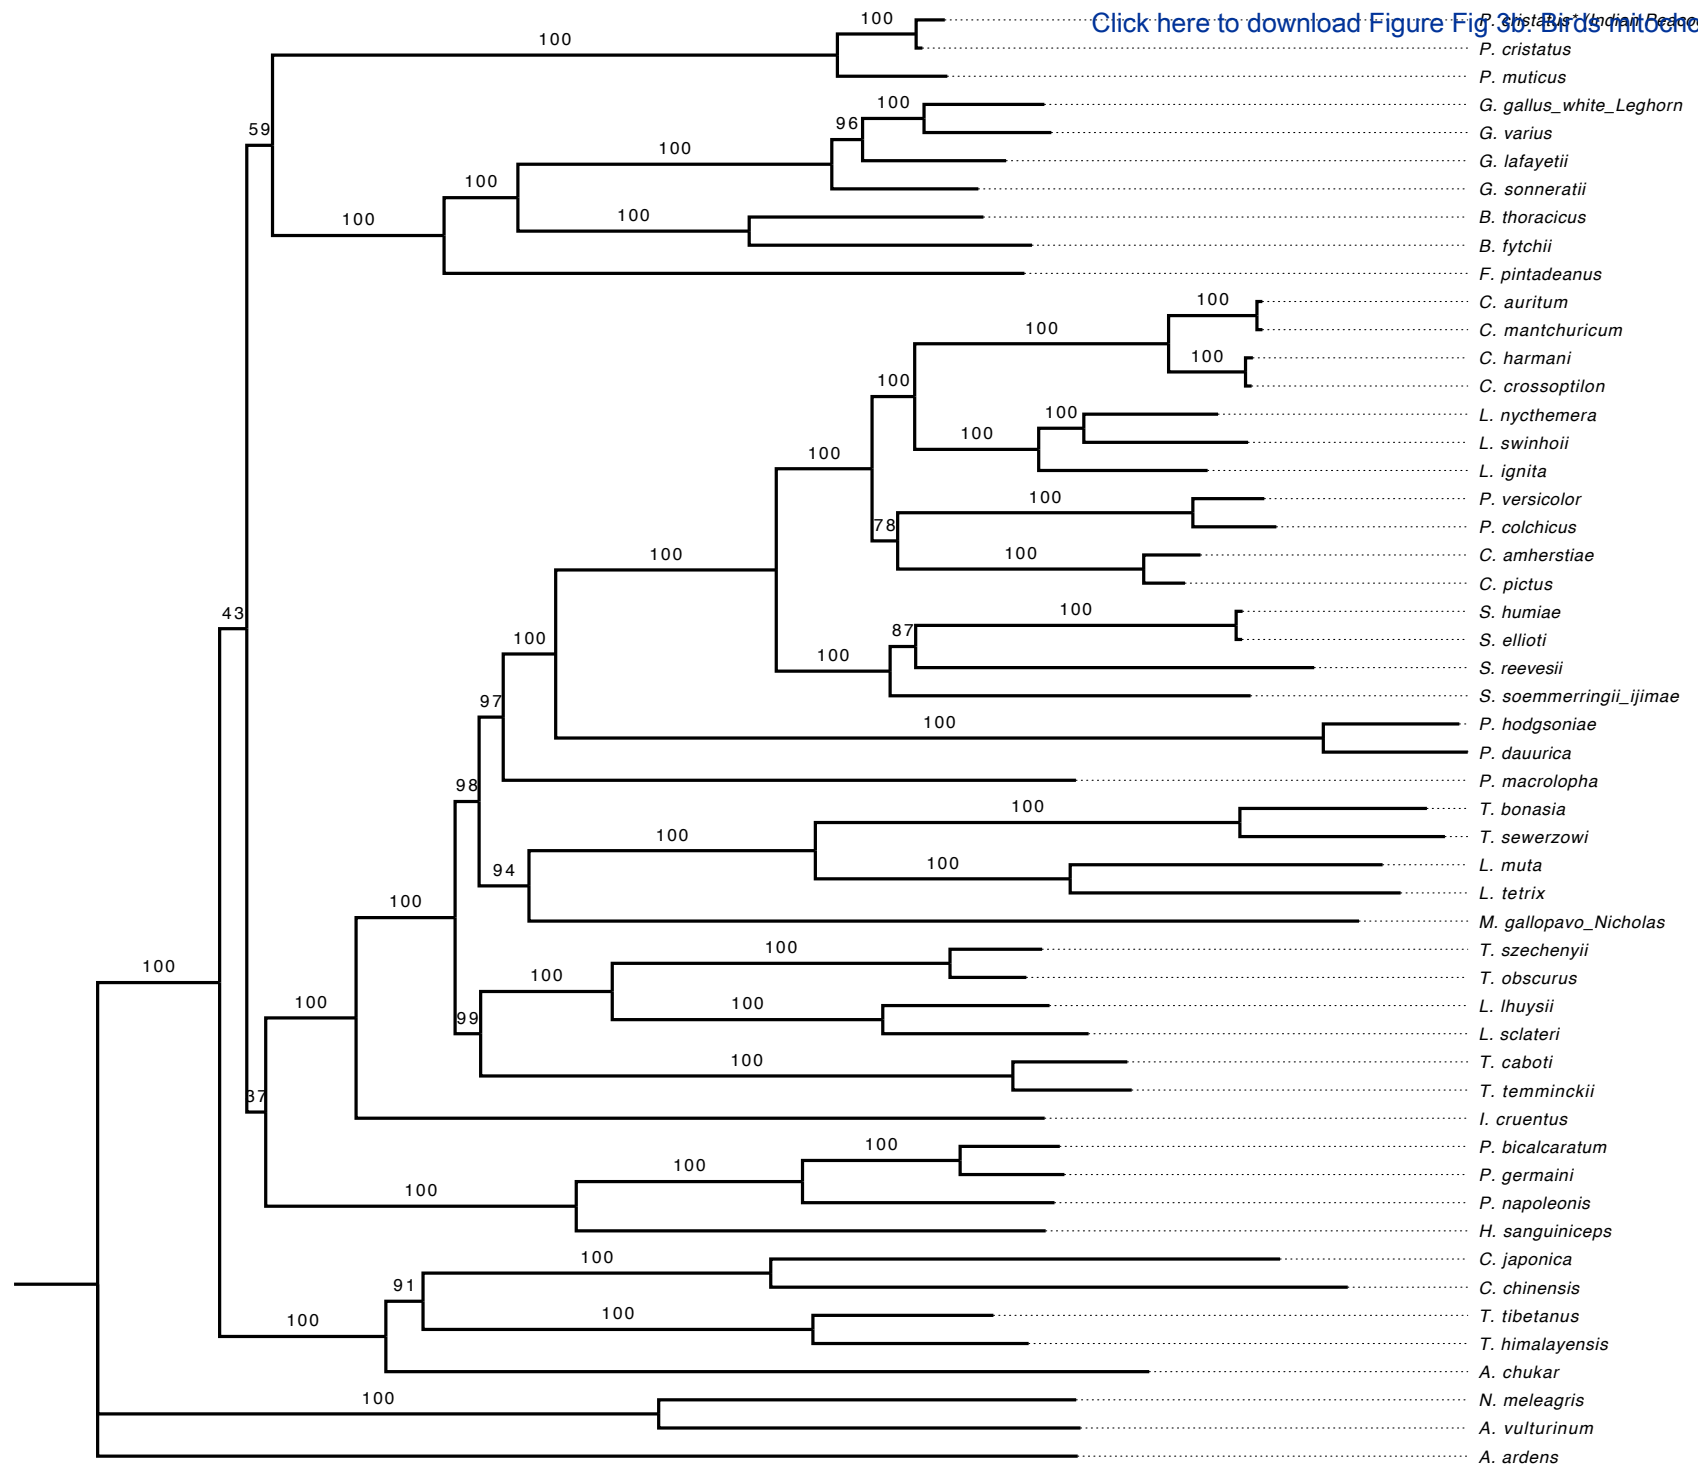

0.03

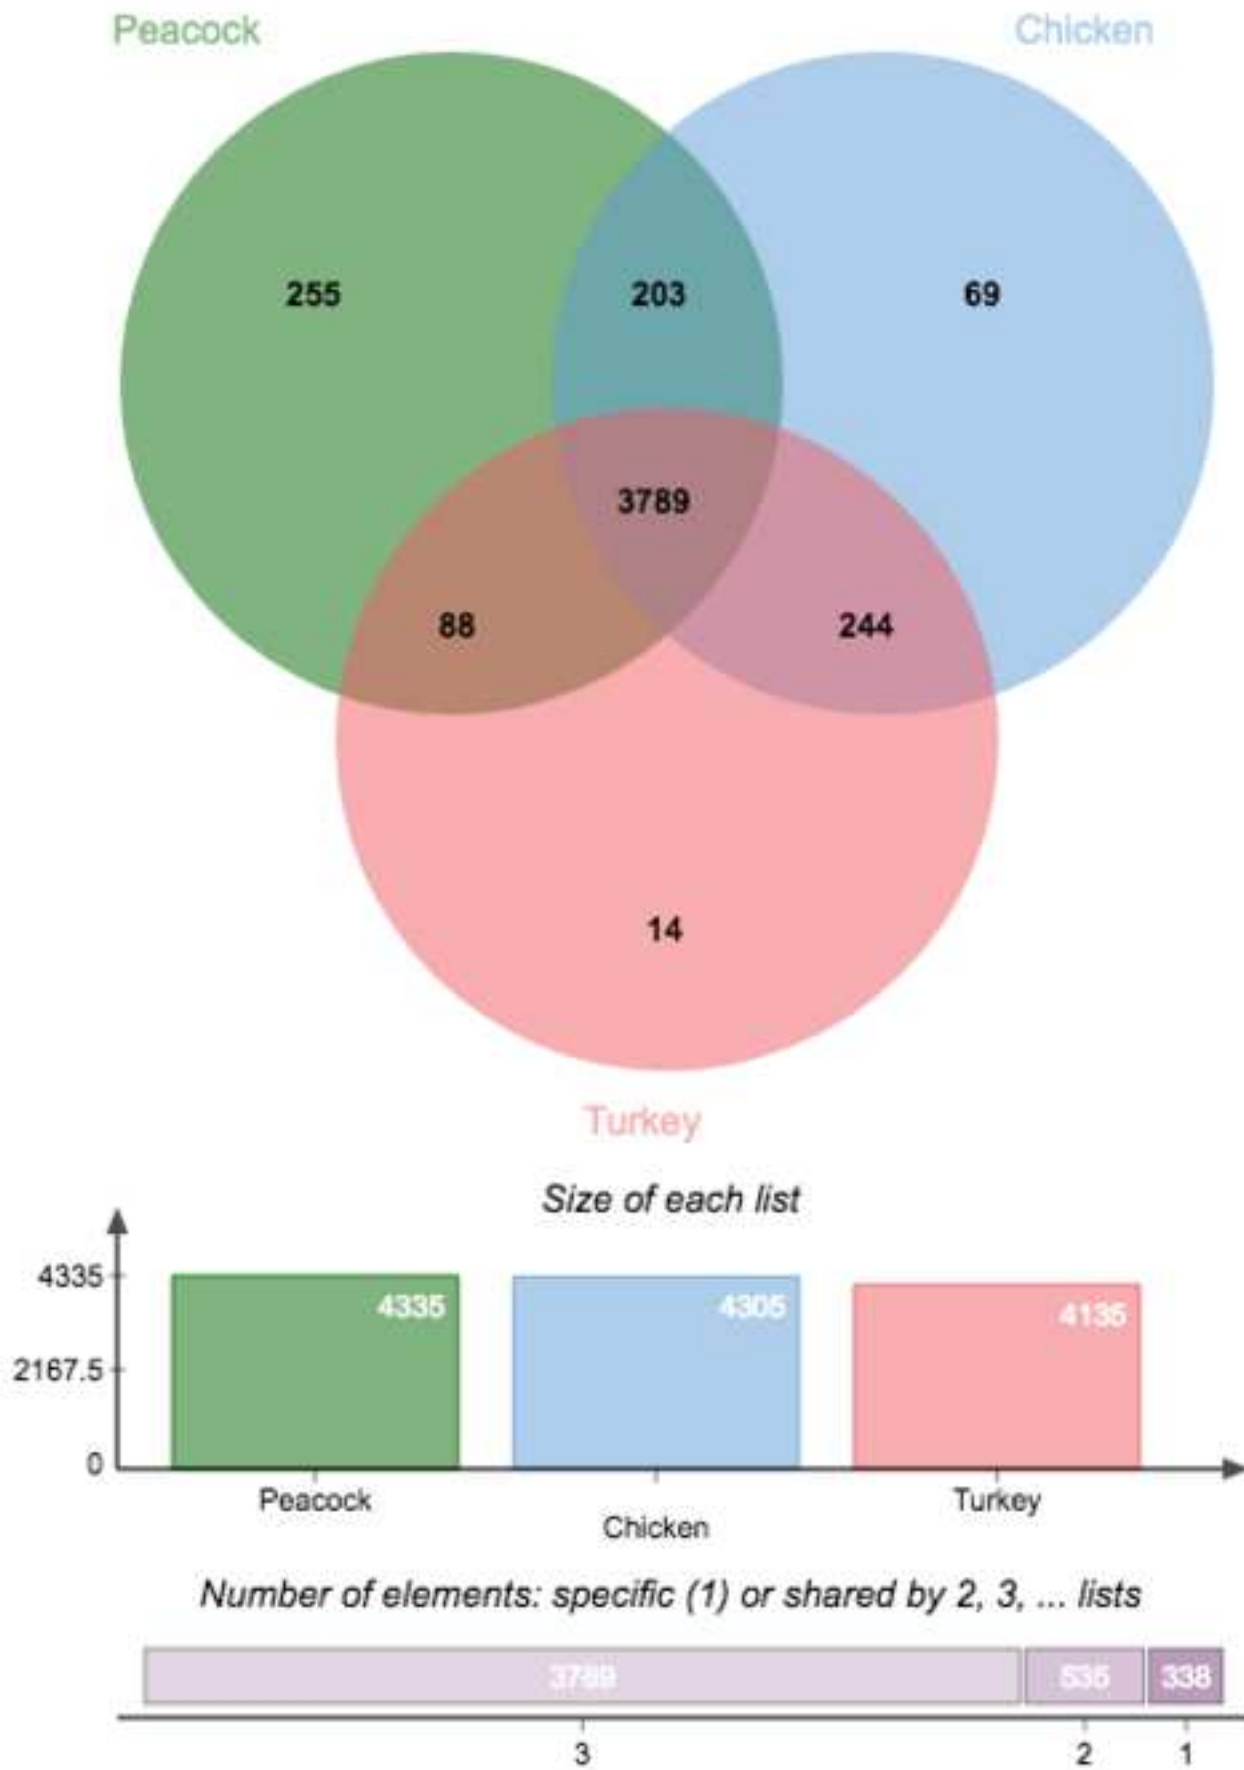

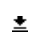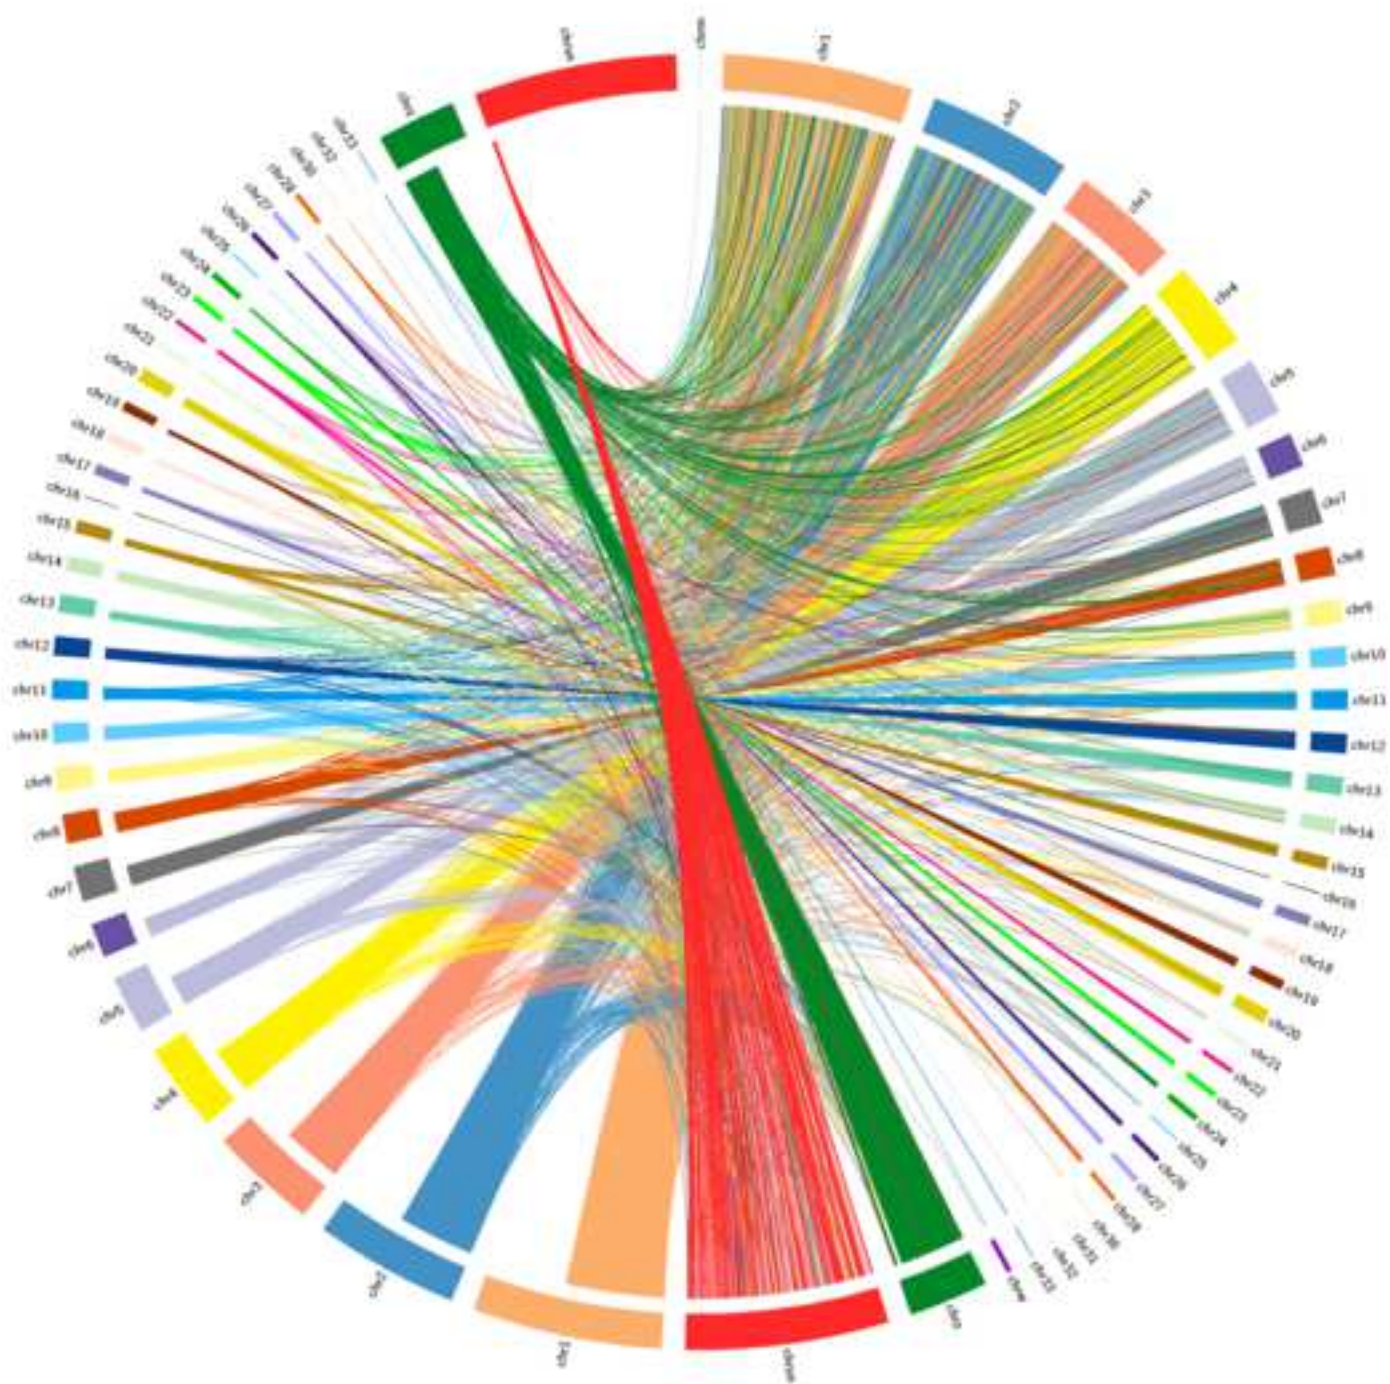

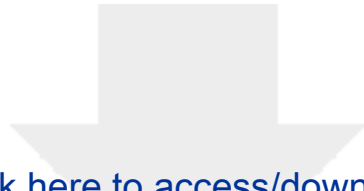

[Click here to access/download](#)

**Supplementary Material**

[Supplementary\\_Notes\\_Mitochondria.docx](#)

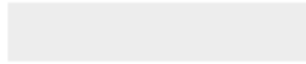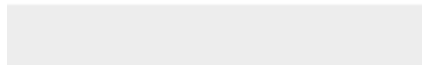





[Click here to access/download](#)

**Supplementary Material**

[Description of all the tables and figures.docx](#)





[Click here to access/download](#)

**Supplementary Material**

[Table\\_S1\\_ReadStats\\_Table\\_S2\\_TEs.xlsx](#)

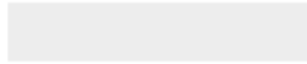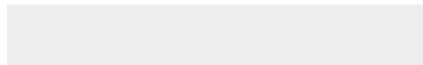

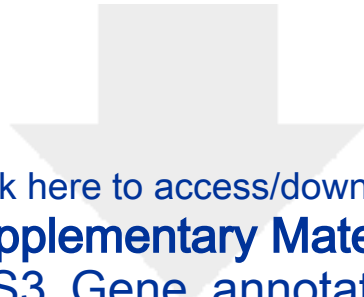

Click here to access/download  
**Supplementary Material**  
Table\_S3\_Gene\_annotation.xlsx

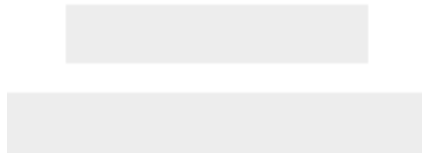



Click here to access/download  
**Supplementary Material**  
Table\_S4\_KEGG\_annotation.xlsx



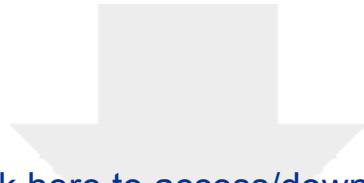

Click here to access/download  
**Supplementary Material**  
Table\_S5\_KOG\_annotation.xlsx

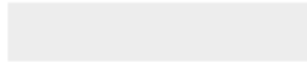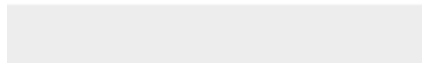



[Click here to access/download](#)

**Supplementary Material**

[Table\\_S6\\_BlastVsHumanProteins.xlsx](#)

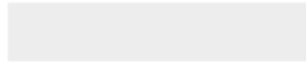



Click here to access/download  
**Supplementary Material**  
Table\_S7\_SSR.xlsx



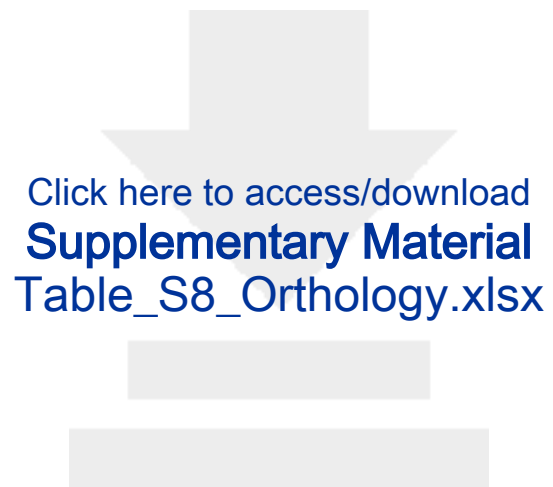



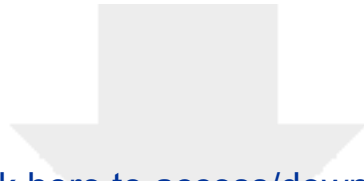

[Click here to access/download](#)

**Supplementary Material**

[Table\\_S9\\_Species\\_for\\_mitochondriaxlsx.xlsx](#)





Click here to access/download  
**Supplementary Material**  
Table\_S10\_Pfam\_Analysis.xlsx



Supplement: giz038_giga-d-18-00280_original_submission.pdf [file giz038_giga-d-18-00280_original_submission.pdf]
