# Supplementary material for: De novo assembly of the Indian blue peacock (Pavo cristatus) genome using Oxford Nanopore technology and Illumina sequencing
Source: PubMed Central journal article supplement (PMC6511069; doi:10.1093/gigascience/giz038), 2019-05-11

## De novo genome assembly of the Indian Blue Peacock (*Pavo cristatus*), from Oxford Nanopore and Illumina sequencing

--Manuscript Draft--

|                                                      |                                                                                                                                                                                                                                                                                                                                                                                                                                                                                                                                                                                                                                                                                                                                                                                                                                                                                                                                                                                                                                                                                                                                                                                                                                                                                                                                                                                                                                                                                                                                                                                                                                                                                                                                                                                                                                                                                                                                                                                                                                                                                                                                                                                                                                                                                                                                                                                                                                                                                                                                                                                                                                                                                        |
|------------------------------------------------------|----------------------------------------------------------------------------------------------------------------------------------------------------------------------------------------------------------------------------------------------------------------------------------------------------------------------------------------------------------------------------------------------------------------------------------------------------------------------------------------------------------------------------------------------------------------------------------------------------------------------------------------------------------------------------------------------------------------------------------------------------------------------------------------------------------------------------------------------------------------------------------------------------------------------------------------------------------------------------------------------------------------------------------------------------------------------------------------------------------------------------------------------------------------------------------------------------------------------------------------------------------------------------------------------------------------------------------------------------------------------------------------------------------------------------------------------------------------------------------------------------------------------------------------------------------------------------------------------------------------------------------------------------------------------------------------------------------------------------------------------------------------------------------------------------------------------------------------------------------------------------------------------------------------------------------------------------------------------------------------------------------------------------------------------------------------------------------------------------------------------------------------------------------------------------------------------------------------------------------------------------------------------------------------------------------------------------------------------------------------------------------------------------------------------------------------------------------------------------------------------------------------------------------------------------------------------------------------------------------------------------------------------------------------------------------------|
| <b>Manuscript Number:</b>                            | GIGA-D-18-00280R2                                                                                                                                                                                                                                                                                                                                                                                                                                                                                                                                                                                                                                                                                                                                                                                                                                                                                                                                                                                                                                                                                                                                                                                                                                                                                                                                                                                                                                                                                                                                                                                                                                                                                                                                                                                                                                                                                                                                                                                                                                                                                                                                                                                                                                                                                                                                                                                                                                                                                                                                                                                                                                                                      |
| <b>Full Title:</b>                                   | De novo genome assembly of the Indian Blue Peacock ( <i>Pavo cristatus</i> ), from Oxford Nanopore and Illumina sequencing                                                                                                                                                                                                                                                                                                                                                                                                                                                                                                                                                                                                                                                                                                                                                                                                                                                                                                                                                                                                                                                                                                                                                                                                                                                                                                                                                                                                                                                                                                                                                                                                                                                                                                                                                                                                                                                                                                                                                                                                                                                                                                                                                                                                                                                                                                                                                                                                                                                                                                                                                             |
| <b>Article Type:</b>                                 | Data Note                                                                                                                                                                                                                                                                                                                                                                                                                                                                                                                                                                                                                                                                                                                                                                                                                                                                                                                                                                                                                                                                                                                                                                                                                                                                                                                                                                                                                                                                                                                                                                                                                                                                                                                                                                                                                                                                                                                                                                                                                                                                                                                                                                                                                                                                                                                                                                                                                                                                                                                                                                                                                                                                              |
| <b>Funding Information:</b>                          |                                                                                                                                                                                                                                                                                                                                                                                                                                                                                                                                                                                                                                                                                                                                                                                                                                                                                                                                                                                                                                                                                                                                                                                                                                                                                                                                                                                                                                                                                                                                                                                                                                                                                                                                                                                                                                                                                                                                                                                                                                                                                                                                                                                                                                                                                                                                                                                                                                                                                                                                                                                                                                                                                        |
| <b>Abstract:</b>                                     | <p><b>Background</b><br/> <i>Pavo cristatus</i>, the Indian peafowl are located in natural habitats of South Asia. The male blue peacock bird is known for its elegance, majestic looks and beauty. Since prehistoric times they have been described in Indian culture and has been adopted as the national bird of India. The findings from avian genomics have contributed immensely toward understanding the vertebrate genome evolution. Genome sequencing of the birds performed until recently have been generated by using Sanger, 454, Illumina or Pacbio based next generation sequencing technologies. In this study, we present the first draft genome sequence of the peacock using Illumina and Oxford Nanopore technologies (ONT).</p> <p><b>Findings</b><br/> For the first time in avian genomics, sequencing from ONT has been used for the whole genome assembly. ONT sequencing resulted in approximately 2.3-fold sequencing coverage, whereas Illumina generated 150 bp paired-end sequence data at 284.6-fold sequencing coverage from five libraries. Subsequently, we generated de novo genome assembly of the peacock genome with a 0.915 Gigabases (Gb) with a scaffold N50 of 0.23 Megabases (Mb). We also predicted that the peacock genome contains 23,153 protein-coding genes and 75,315,566 bp (7.33%) of repetitive sequences.</p> <p><b>Conclusions</b><br/> We report a high-quality genome assembly of the peacock using a hybrid assembly generated from Illumina and ONT sequencing platforms. Long read chemistry generated from ONT was found to be useful in addressing challenges related to de novo assembly particularly at regions containing repetitive sequences that span longer than the read length, and which cannot be resolved using only short-read-based assembly. The contig assembly on the short reads from Illumina resulted in an N50 of 1639 bases, whereas using 2.3x coverage from ONT increased the N50 by nine fold to 14,749 bases. The initial contig assembly based on Illumina sequencing reads alone resulted in total of 685,241 contigs. Further scaffolding on assembled contigs using both Illumina and ONT sequencing reads resulted in a final assembly having 15,025 super scaffolds with a N50 of about 0.23 Mb. The reliability of our genome assembly was verified with the fact that 95% of proteins predicted by homology were matched to those submitted in public repository. Further, the phylogenetic tree on the conserved genes from the avian species showed <i>P. cristatus</i> being grouped with <i>G. gallus</i>, <i>M. gallopavo</i> and <i>A. platyrhynchos</i> (mallard the duck).</p> |
| <b>Corresponding Author:</b>                         | Subhradip Karmakar, PhD<br>All India Institute of Medical Sciences<br>New Delhi, Delhi INDIA                                                                                                                                                                                                                                                                                                                                                                                                                                                                                                                                                                                                                                                                                                                                                                                                                                                                                                                                                                                                                                                                                                                                                                                                                                                                                                                                                                                                                                                                                                                                                                                                                                                                                                                                                                                                                                                                                                                                                                                                                                                                                                                                                                                                                                                                                                                                                                                                                                                                                                                                                                                           |
| <b>Corresponding Author Secondary Information:</b>   |                                                                                                                                                                                                                                                                                                                                                                                                                                                                                                                                                                                                                                                                                                                                                                                                                                                                                                                                                                                                                                                                                                                                                                                                                                                                                                                                                                                                                                                                                                                                                                                                                                                                                                                                                                                                                                                                                                                                                                                                                                                                                                                                                                                                                                                                                                                                                                                                                                                                                                                                                                                                                                                                                        |
| <b>Corresponding Author's Institution:</b>           | All India Institute of Medical Sciences                                                                                                                                                                                                                                                                                                                                                                                                                                                                                                                                                                                                                                                                                                                                                                                                                                                                                                                                                                                                                                                                                                                                                                                                                                                                                                                                                                                                                                                                                                                                                                                                                                                                                                                                                                                                                                                                                                                                                                                                                                                                                                                                                                                                                                                                                                                                                                                                                                                                                                                                                                                                                                                |
| <b>Corresponding Author's Secondary Institution:</b> |                                                                                                                                                                                                                                                                                                                                                                                                                                                                                                                                                                                                                                                                                                                                                                                                                                                                                                                                                                                                                                                                                                                                                                                                                                                                                                                                                                                                                                                                                                                                                                                                                                                                                                                                                                                                                                                                                                                                                                                                                                                                                                                                                                                                                                                                                                                                                                                                                                                                                                                                                                                                                                                                                        |
| <b>First Author:</b>                                 | Ruby Dhar                                                                                                                                                                                                                                                                                                                                                                                                                                                                                                                                                                                                                                                                                                                                                                                                                                                                                                                                                                                                                                                                                                                                                                                                                                                                                                                                                                                                                                                                                                                                                                                                                                                                                                                                                                                                                                                                                                                                                                                                                                                                                                                                                                                                                                                                                                                                                                                                                                                                                                                                                                                                                                                                              |

|                                                |                                                                                                                                                                                                                                                                                                                                                                                                                                                                                                                                                                                                                                                                                                                                                                                                                                                                                                                                                                                                                                                                                                                                                                                                                                                                                                                                                                                                                                                                                                                                                                                                                                                        |
|------------------------------------------------|--------------------------------------------------------------------------------------------------------------------------------------------------------------------------------------------------------------------------------------------------------------------------------------------------------------------------------------------------------------------------------------------------------------------------------------------------------------------------------------------------------------------------------------------------------------------------------------------------------------------------------------------------------------------------------------------------------------------------------------------------------------------------------------------------------------------------------------------------------------------------------------------------------------------------------------------------------------------------------------------------------------------------------------------------------------------------------------------------------------------------------------------------------------------------------------------------------------------------------------------------------------------------------------------------------------------------------------------------------------------------------------------------------------------------------------------------------------------------------------------------------------------------------------------------------------------------------------------------------------------------------------------------------|
| <b>First Author Secondary Information:</b>     |                                                                                                                                                                                                                                                                                                                                                                                                                                                                                                                                                                                                                                                                                                                                                                                                                                                                                                                                                                                                                                                                                                                                                                                                                                                                                                                                                                                                                                                                                                                                                                                                                                                        |
| <b>Order of Authors:</b>                       | <p>Ruby Dhar</p> <p>Ashikh Seethy</p> <p>Karthikeyan Pethusamy</p> <p>Vishwajeet Rohil</p> <p>Sunil Singh</p> <p>Kakali Purkayastha</p> <p>Sandeep Goswami</p> <p>Rakesh Singh</p> <p>Indrani Mukherjee</p> <p>Ankita Raj</p> <p>Tryambak Srivastava</p> <p>Sovon Acharya</p> <p>Balaji Rajashekhar</p> <p>Subhradip Karmakar, PhD</p>                                                                                                                                                                                                                                                                                                                                                                                                                                                                                                                                                                                                                                                                                                                                                                                                                                                                                                                                                                                                                                                                                                                                                                                                                                                                                                                 |
| <b>Order of Authors Secondary Information:</b> |                                                                                                                                                                                                                                                                                                                                                                                                                                                                                                                                                                                                                                                                                                                                                                                                                                                                                                                                                                                                                                                                                                                                                                                                                                                                                                                                                                                                                                                                                                                                                                                                                                                        |
| <b>Response to Reviewers:</b>                  | <p>Dear Dr. Scott,</p> <p>We have addressed all the reviewer's comments and have made significant additional revisions as required by you and both the reviewers. We have removed content on the sexual selection from the manuscript. Below are point-by-point response for the queries raised by the reviewers.</p> <p>1.Abstract: Page 2, 12-13: "Its length ..." The level of detail in this sentence is inappropriate for an abstract, and it should be removed.</p> <p>Reply: the sentence below is completely removed from abstract<br/> "its length varies from 92-125 centimeter (without train), weighing about 4-8 Kilograms and lives up to 20 years in the wild."</p> <p>2.Page 3, 15: "Observation from our study showed...", rewrite as "Our study showed..."</p> <p>Reply: The sentence has been corrected as suggested.</p> <p>3.Page 3, 19: "Further a comparative genomics ..." this sentence is grammatically incorrect</p> <p>Reply: this sentence is modified to "Further predicted peacock proteins when compared with"</p> <p>4.Page 3, 32: "amongst the clade of birds based on their ability to fly". I think you should just indicate the clade with which Pavo was grouped.</p> <p>Reply: The sentence is modified to "Further, the phylogentic tree on the conserved genes from the avian species showed the P. cristatus amongst in the clade of G. gallus, M. gallopavo and A. platyrhynchos (mallard),"</p> <p>5.Page 4, 27: "The avian genomics began ..." This paragraph is still too much introduction and too general to be helpful for the paper. The phrase "The avian genomics" is grammatically incorrect.</p> |

Reply: The first 2 sentences are completely removed now the new paragraph starts as “The genome sequencing of the model organism Gallus gallus species (Chicken) (Hillier et al. 2004) and wide variety of avian species (Zhang et al. 2014). have provided a novel perspective on vertebrate genome evolution in better understanding number of distinct characteristics and the annotation of mammalian genomic regions.”

6. Page 4, 55: “aves” I think this should be italicized.

Reply: In other published articles “aves” is used as “Aves”. To keep in standard format we have changed to Aves without italics.

7. Page 5, 10-15: “We have unraveled ...” I don’t think that these are demonstrated in the results (“genomic signatures”, “gene pools”). I think that “gene pools” is used incorrectly here.

Reply: The sentence is changed from “We have unraveled some of the genomic signatures and thus have reported unique gene pools of this bird by performing comparative genomics.”

to

“The protein comparisons between the peacock, chicken and turkey will reveal proteins, conserved domains and functional annotations common and absent between the species.”

8. Page 9, 32-33: “The raw data were then base-called ...” This reads like it is directly following the MinION library preparation and sequencing section, which it doesn’t. It should either be re-written to fix this or the paragraphs should be re-ordered.

Reply: To resolve the issues the paragraphs are arranged under two new broad sections

Library preparation and sequencing

Raw data quality control and processing

9. Page 10, 41-46: “Gene models were predicted on a hard masked draft genome and further genes were predicted using AUGUSTUS” This sounds like gene models were predicted twice (once on the hard-masked genome and once using AUGUSTUS).

Reply: This sentence was corrected to

“Gene models were predicted on a hard masked draft genome using AUGUSTUS”

10. Page 14, 59: “Significant gene Ontology (GO)” Significance in this context implies statistical significance, but no statistical tests are presented. Throughout this section, sometimes results are presented as percentages or counts inconsistently.

Reply: Now the paragraph starts from Gene ontology. In the whole section the total protein numbers (% in brackets) are mentioned. This has been represented uniformly in this paragraph.

11. Page 15, 4-5: The meaning of the phrase “unique proteins” is unclear here, since you’re just talking about the set of predicted proteins from the peacock genome.

Reply: The unique protein is changed to “peacock specific proteins” “absent between” or “not clustered with other species” in the entire manuscript

12. Page 15, 12-13: “showed expansions in ontologies” should be “showed expansions in GO categories”.

Reply: The sentence has been modified as suggested.

13. Page 15, 12-13: Fig. S4 appears to be missing from the attachments in this document. I don't know why Table S7 is referenced here. Table S7 doesn't have GO terms or any other functional annotation information.

Reply: Fig. S4 was removed from the manuscript after previous revision. We have removed the Fig. S4 from the manuscript.

14. Page 15, 29-32: "With the stringent cutoff" This makes it sound like there were two cutoffs — a stringent one and a lenient one. This result (13,860 genes unique to peacock) still seems to point to over-prediction in the peacock genes than actual unique genes.

Reply: The cutoff parameters for clustering were 70% alignment coverage and length difference of 0.7. With above cutoff we obtained 13860 clusters not clustering with other avian proteins. This could be due to the sensitivity of the CD-Hit tool to identify highly conserved proteins in avian species. BLAST similarity and further clustering them may result in less number of unique proteins. This will allow short sequences clustered with complete long sequences resulting in false positive results. Due to very low coverage of sequencing of some avian species which may have resulted in incomplete ORF predictions.

15. Page 17, 24-25: The timetree URL isn't the correct way to reference the tool. <http://www.timetree.org/faqs#q7>

Reply: The following reference have been included in the references section of the manuscript

Kumar S, Stecher G, Suleski M, Hedges SB (2017) TimeTree: A Resource for Timelines, Timetrees, and Divergence Times. *Mol Biol Evol* 34 (7): 1812-1819

16. Page 17, 51-52: It isn't clear which methods or results section Fig. 8 is connected to. These results should be addressed before the Conclusions section of the paper.

Reply: This sentence has been moved to the results sections under Pfam. "The domain comparisons between the species showed gene family expansions such as Kinases, Zn finger proteins, GTPases and others in either one of the aforementioned species (Fig. 6)."

The other figure order and also legends have been modified

17. Page 18, 5-6: This paragraph needs to be shortened to one or two sentences pointing out the importance of tail feathers in the biology of the peacock and relevant literature regarding genetic control of plumage that might inform future studies. The discussion of sexual selection is irrelevant to the results presented in this paper. This point has been repeatedly addressed by reviewers in the past two rounds of revision.

Reply: The following paragraph regarding sexual selection have been removed from the manuscript,

One of the most important task will be to characterize the genes involved in the coloration of the tail feather plumage in *P. cristatus* (Roulin et al. 2013). The peacock feathers have played a significant role in the mating and sexual selection. Peacock seems to defy the Darwinian laws of natural selection. These concern were raised by no other than Darwin himself. Hence, he proposed the theory of the sexual selection where the female can choose for a male with a certain phenotypic feature such as brilliant color or a long tail (Burgess 2001). Peacock's brilliantly colored long tail feathers seems to evolve at the cost of finding its female partner thereby contributing its beneficial genes, even at the cost of making itself vulnerable to predators. A female peafowl in turn tends to choose the mate with the largest and decorated plumage, which indirectly reflects its healthiness and capacity to wade off potential competitors. Thus understanding the formation of beautiful feathers from the genomic context will help in resolving several evolutionary theories on sexual selection that have been discussed on this species.

And is modified into

The section is now reduced to three new sentences.

18. Page 18, 36-37: "peacock Though" missing period here.

Reply: The period has been included between the sentences.

19. Page 18, 44: suggest replacing "just" with "valuable" here.

Reply: The alternative work have been replaced in the manuscript

20. Page 22, 14-15: I don't think indicating the flight status of birds is helpful in Fig. 4.

Reply: The figure is modified, the flightless and low flying have been removed from the figure and the figure legend.

Additional notes from letter

Your manuscript "De novo genome assembly of the Indian Blue Peacock (*Pavo cristatus*), from Oxford Nanopore and Illumina sequencing" (GIGA-D-18-00280R1) has been re-reviewed by our reviewers. Although it is of interest, we are unable to consider it for publication in its current form as significant additional revisions are required. The reviewers have raised a number of points which we believe would improve the manuscript and may allow a revised version to be published in GigaScience so we are giving you one final chance to address these otherwise we cannot keep considering this paper. It is a shame you ignored some of the previously raised significant revisions that need to be made and have been brought up before, specifically the irrelevant discussion of Darwin and sexual selection. In the final version these and the many other speculative discussions need to be removed to just focus on the data and its validation (including the comparisons of the builds of the many bird genomes currently available).

Reply : We have completely removed sections on Darwin and sexual selection. Significant additional revisions as suggested have been made and the details of each correction are described above.

Please include a point-by-point within the 'Response to Reviewers' box in the submission system. Please ensure you describe additional experiments that were carried out and include a detailed rebuttal of any criticisms or requested revisions that you disagreed with. Please also ensure that your revised manuscript conforms to the journal style, which can be found in the Instructions for Authors on the journal homepage.

Reply : [https://academic.oup.com/gigascience/pages/instructions\\_to\\_authors](https://academic.oup.com/gigascience/pages/instructions_to_authors)

The due date for submitting the revised version of your article is 20 Jan 2019.

Reviewer #1: The manuscript entitled "De novo assembly of Indian Blue Peacock (*Pavo cristatus*), from Oxford Nanopore and Illumina sequencing" details the results from sequencing and assembling the peacock genome. The manuscript is very much improved and should be ready for publication with only minor revisions.

I think this manuscript lacks one very important point. How does this hybrid assembly compare to other avian genome assemblies? For example, the turkey genome used two different genome sequencers while the original chicken genome made use of Sanger sequencing. Furthermore, many of the 48 bird genomes (Jarvis et al.; Zhang et al, 2014) only used Illumina sequencing at different sequencing depths. I think a comparison between these builds (N50, etc.) should be included in this manuscript. This will aid future researchers who are trying to decide the best sequencing strategy for their favorite bird/organism.

Reply :

|                                                                                                                                                                                                                                                                                                  |                                                                                                                                                                                                                                                                                                                                                                                                                                                                                                                                                                                                                                                                                                                                                                                                                                                                                                                                                                                                                                                                                                                                                                                                                                                                                                                                                                                                                                                                                                                                                                                                                                                                                                                                                                                                                                                                                    |
|--------------------------------------------------------------------------------------------------------------------------------------------------------------------------------------------------------------------------------------------------------------------------------------------------|------------------------------------------------------------------------------------------------------------------------------------------------------------------------------------------------------------------------------------------------------------------------------------------------------------------------------------------------------------------------------------------------------------------------------------------------------------------------------------------------------------------------------------------------------------------------------------------------------------------------------------------------------------------------------------------------------------------------------------------------------------------------------------------------------------------------------------------------------------------------------------------------------------------------------------------------------------------------------------------------------------------------------------------------------------------------------------------------------------------------------------------------------------------------------------------------------------------------------------------------------------------------------------------------------------------------------------------------------------------------------------------------------------------------------------------------------------------------------------------------------------------------------------------------------------------------------------------------------------------------------------------------------------------------------------------------------------------------------------------------------------------------------------------------------------------------------------------------------------------------------------|
|                                                                                                                                                                                                                                                                                                  | <p>The abstract and introduction contain several awkward sentences that impede the reader's understanding. For example, the second to last sentence (lines19-22) of the Abstract Background needs to be rewritten.</p> <p>Reply : We have changed the second last sentence in the Abstract Background section.</p> <p>Reviewer #2: The manuscript is much improved over prior versions, but still needs significant revisions.</p> <p>1) The abstract includes too much detail about the general biology of the peacock and can be shortened for clarity and to focus on the results of the manuscript.</p> <p>Reply : We have modified our abstract for clarity and have aligned with the other accepted articles in giga science. The biology is completely removed and we have focusedon the key results and the importance of Nanopore long reads.</p> <p>2) Citations are not numbered in the text and in some cases do not cite the tool or resource correctly (see my note about timetree.org)</p> <p>Reply : The citations are numbered in the text, the timetree.org reference is now correctly cited.</p> <p>3) A supplementary figure (Fig. S4) is missing from the text and the table referenced at the same point of the many script doesn't contain relevant data.</p> <p>Reply : This has been corrected, see above point 13 for details.</p> <p>4) The Conclusions section includes a largely irrelevant section about sexual selection that needs to be removed.</p> <p>Reply : Sections related to sexual selection has been completely removed from the manuscript.</p> <p>5) The Conclusions includes a first reference of a figure that doesn't seem to be referenced in the Methods or Results sections.</p> <p>Reply : This figures is now referenced in results section "Comparison with other species and databases" in the last paragraph as Fig. 7.</p> |
| <b>Additional Information:</b>                                                                                                                                                                                                                                                                   |                                                                                                                                                                                                                                                                                                                                                                                                                                                                                                                                                                                                                                                                                                                                                                                                                                                                                                                                                                                                                                                                                                                                                                                                                                                                                                                                                                                                                                                                                                                                                                                                                                                                                                                                                                                                                                                                                    |
| <b>Question</b>                                                                                                                                                                                                                                                                                  | <b>Response</b>                                                                                                                                                                                                                                                                                                                                                                                                                                                                                                                                                                                                                                                                                                                                                                                                                                                                                                                                                                                                                                                                                                                                                                                                                                                                                                                                                                                                                                                                                                                                                                                                                                                                                                                                                                                                                                                                    |
| Are you submitting this manuscript to a special series or article collection?                                                                                                                                                                                                                    | No                                                                                                                                                                                                                                                                                                                                                                                                                                                                                                                                                                                                                                                                                                                                                                                                                                                                                                                                                                                                                                                                                                                                                                                                                                                                                                                                                                                                                                                                                                                                                                                                                                                                                                                                                                                                                                                                                 |
| <b>Experimental design and statistics</b>                                                                                                                                                                                                                                                        | Yes                                                                                                                                                                                                                                                                                                                                                                                                                                                                                                                                                                                                                                                                                                                                                                                                                                                                                                                                                                                                                                                                                                                                                                                                                                                                                                                                                                                                                                                                                                                                                                                                                                                                                                                                                                                                                                                                                |
| Full details of the experimental design and statistical methods used should be given in the Methods section, as detailed in our <a href="#">Minimum Standards Reporting Checklist</a> . Information essential to interpreting the data presented should be made available in the figure legends. |                                                                                                                                                                                                                                                                                                                                                                                                                                                                                                                                                                                                                                                                                                                                                                                                                                                                                                                                                                                                                                                                                                                                                                                                                                                                                                                                                                                                                                                                                                                                                                                                                                                                                                                                                                                                                                                                                    |

|                                                                                                                                                                                                                                                                                                                                                                                                                                                                                                                                                         |            |
|---------------------------------------------------------------------------------------------------------------------------------------------------------------------------------------------------------------------------------------------------------------------------------------------------------------------------------------------------------------------------------------------------------------------------------------------------------------------------------------------------------------------------------------------------------|------------|
| <p>Have you included all the information requested in your manuscript?</p>                                                                                                                                                                                                                                                                                                                                                                                                                                                                              |            |
| <p><b>Resources</b></p> <p>A description of all resources used, including antibodies, cell lines, animals and software tools, with enough information to allow them to be uniquely identified, should be included in the Methods section. Authors are strongly encouraged to cite <a href="#">Research Resource Identifiers</a> (RRIDs) for antibodies, model organisms and tools, where possible.</p> <p>Have you included the information requested as detailed in our <a href="#">Minimum Standards Reporting Checklist</a>?</p>                     | <p>Yes</p> |
| <p><b>Availability of data and materials</b></p> <p>All datasets and code on which the conclusions of the paper rely must be either included in your submission or deposited in <a href="#">publicly available repositories</a> (where available and ethically appropriate), referencing such data using a unique identifier in the references and in the “Availability of Data and Materials” section of your manuscript.</p> <p>Have you have met the above requirement as detailed in our <a href="#">Minimum Standards Reporting Checklist</a>?</p> | <p>Yes</p> |

[Click here to view linked References](#)

1 ***De novo* genome assembly of the Indian Blue Peacock**  
2  
3  
4 **(*Pavo cristatus*), from Oxford Nanopore and Illumina**  
5  
6  
7 **sequencing**  
8  
9

10  
11 4  
12  
13 5  
14  
15  
16 **Authors:** Ruby Dhar<sup>1</sup>, Ashikh Seethy<sup>1</sup>, Karthikeyan Pethusamy<sup>1</sup>, Vishwajeet Rohil<sup>2</sup>, Sunil  
17  
18 Singh<sup>1</sup>, Kakali Purkayastha<sup>2</sup>, Sandeep Goswami<sup>1</sup>, Rakesh Singh<sup>3</sup>, Indrani Mukherjee<sup>1</sup>, Ankita  
19  
20 Raj<sup>1</sup>, Tryambak Srivastava<sup>1</sup>, Sovon Acharya<sup>1</sup>, Balaji Rajashekhar<sup>4,5,\*</sup> and Subhradip  
21  
22 Karmakar<sup>1,\*</sup>  
23  
24

25  
26 10  
27  
28 **Affiliation:** <sup>1</sup>Department of Biochemistry, AIIMS, New Delhi, India. <sup>2</sup>Vallabhbhai Patel Chest  
29  
30 Institute (VPCI), New Delhi, India. <sup>3</sup>Kanpur Zoo, Kanpur, India. <sup>4</sup>Genotypic Technology Pvt.  
31  
32 Ltd., Bangalore, India. and <sup>5</sup>Institute of Computer Science, University of Tartu, 50409 Tartu,  
33  
34 Estonia  
35  
36 14  
37

38 15  
39  
40 16 \*Corresponding Authors email: balaji@ut.ee, subhradip.k@aiims.edu  
41  
42

43 17  
44  
45 18  
46  
47 19  
48  
49  
50 20 **Running Title:** *De novo* Genome Assembly of the Peacock Bird  
51

52 21  
53  
54 22 **Key words:** Peacock, *Pavo cristatus*, Indian National Bird, Genome Assembly, Oxford  
55  
56  
57 23 Nanopore.  
58

59 24  
60  
61  
62  
63  
64  
65



1 **Abstract**

2 **Background**

3 *Pavo cristatus*, the Indian peafowl are located in natural habitats of South Asia. The male  
4 blue peacock bird is known for its elegance, majestic looks and beauty. Since prehistoric  
5 times they have been described in Indian culture and has been adopted as the national bird of  
6 India. The findings from avian genomics have contributed immensely toward understanding  
7 the vertebrate genome evolution. Genome sequencing of the birds performed until recently  
8 have been generated by using Sanger, 454, Illumina or Pacbio based next generation  
9 sequencing technologies. In this study, we present the first draft genome sequence of the  
10 peacock using Illumina and Oxford Nanopore technologies (ONT).

11  
12 **Findings**

13 For the first time in avian genomics, sequencing from ONT has been used for the whole  
14 genome assembly. ONT sequencing resulted in approximately 2.3-fold sequencing coverage,  
15 whereas Illumina generated 150 bp paired-end sequence data at 284.6-fold sequencing  
16 coverage from five libraries. Subsequently, we generated *de novo* genome assembly of the  
17 peacock genome with a 0.915 Gigabases (Gb) with a scaffold N50 of 0.23 Megabases (Mb).  
18 We also predicted that the peacock genome contains 23,153 protein-coding genes and  
19 75,315,566 bp (7.33%) of repetitive sequences.

20  
21 **Conclusions**

22 We report a high-quality genome assembly of the peacock using a hybrid assembly generated  
23 from Illumina and ONT sequencing platforms. Long read chemistry generated from ONT  
24 was found to be useful in addressing challenges related to *de novo* assembly particularly at  
25 regions containing repetitive sequences that span longer than the read length, and which

1 cannot be resolved using only short-read-based assembly. The contig assembly on the short  
2 reads from Illumina resulted in an N50 of 1639 bases, whereas using 2.3x coverage from  
3 ONT increased the N50 by nine fold to 14,749 bases. The initial contig assembly based on  
4 Illumina sequencing reads alone resulted in total of 685,241 contigs. Further scaffolding on  
5 assembled contigs using both Illumina and ONT sequencing reads resulted in a final  
6 assembly having 15,025 super scaffolds with a N50 of about 0.23 Mb. The reliability of our  
7 genome assembly was verified with the fact that 95% of proteins predicted by homology  
8 were matched to those submitted in public repository. Further, the phylogentic tree on the  
9 conserved genes from the avian species showed *P. cristatus* being grouped with *G. gallus*, *M.*  
10 *gallopavo* and *A. platyrhynchos* (mallard the duck).  
11

## 1 Introduction

2 *Pavo cristatus* commonly known as the Indian blue peafowl are native to South Asian  
3 countries. Apart from the wild, they are usually found as exhibits in park and zoo, besides  
4 being raised for breeding and conservation purposes [1, 2] (Fig. 1). The peacock has been  
5 widely referred in ancient Indian literatures. They have been found to be closely associated  
6 with the life and culture of the people from South East Asia, symbolizing beauty, love, grace  
7 and pride [3, 4]. Owing to these, the peacock obtained the status as the National Bird of India  
8 in 1963.

9 Genome sequencing of the avian model organism *Gallus gallus* (chicken) [6], as well as  
10 variety of other avian species [7] have provided a novel perspective on vertebrate genome  
11 evolution. This enabled us to understand the genome structure better and annotate the  
12 mammalian genome. Genome studies of *Gallus gallus* with respect to the human have  
13 revealed an extremely high level of conservation within the orthologous regions [8].

14  
15 Despite the wealth of information from the existing avian genome sequencing projects, it is  
16 still important to sequence genome of other new species to add value, both into avian and  
17 vertebrate genomics. For the first time in avian genomics, Oxford Nanopore technology  
18 (ONT or Nanopore) has been used to sequence a bird genome presented in this study. Long  
19 reads have been helpful during the *de-novo* assembly of the genome especially in the GC rich  
20 repeat regions which invariably poses serious challenges in genome construction.

21 Comparative genomics with other birds will help in understanding the uniqueness of peacock  
22 genome, development of this species, complex plumage pigmentation, sexual dimorphism  
23 and its evolutionary relationships with other birds. The characterization of the genes and  
24 association with specific function will provide better understanding of the peafowl species.

25 The protein comparisons among the peacock, chicken and turkey will reveal proteins,

1 conserved domains and functional annotations that are common and absent among these  
2 species.

## 3 4 **Materials and methods**

### 5 **Sample collection and extraction of DNA**

6 The whole blood of male peacock was collected from Kanpur zoo, India after obtaining the  
7 necessary ethical and institutional approval. Approximately, 20  $\mu$ l of proteinase K (PK)  
8 solution was taken into a 1.5 ml microcentrifuge tube, 200  $\mu$ l of blood was added and briefly  
9 mixed. Furthermore, 200  $\mu$ l of cell lysis buffer was added to the tube, mixed by vortexing for  
10 10 seconds, incubated at 56°C for 10 minutes. ReliaPrep™ Binding Column was placed into  
11 an empty collection tube. Furthermore, 250  $\mu$ l of Binding Buffer (BBA) was added to the  
12 tube, and mixed by vortexing for 10 seconds with a vortex mixer. Contents of the tube were  
13 added to the ReliaPrep™ binding column, capped and placed in a refrigerated  
14 microcentrifuge. These were then centrifuged for 1 minute at maximum speed and flow  
15 through was discarded. Binding column was placed into a fresh collection tube. In addition,  
16 500  $\mu$ l of column wash solution was added to the column and centrifuged for 3 minutes at  
17 maximum speed; flow through was again discarded. Column washing is repeated thrice.  
18 Columns were then placed in a nuclease free clean 1.5 ml microcentrifuge tube. Furthermore,  
19 100  $\mu$ l of Nuclease-Free Water was then added to the column and centrifuged for an  
20 additional 1 minute at maximum speed. Column was discarded and elute was saved. The  
21 concentration and purity of the extracted DNA was evaluated using Nanodrop  
22 Spectrophotometer (Thermo Scientific) and Qubit flurometer and integrity was checked on a  
23 0.8% agarose gel. The DNA sample was aliquoted for library preparation on two different  
24 platforms: Illumina HiSeq4000 and Oxford Nanopore Technologies (ONT).

1 **Library preparation and sequencing**

2 **A. Paired-End library preparation and sequencing**

3 Whole genome sequencing (WGS) libraries were prepared with Illumina-compatible  
4 NEXTflex DNA sequencing kit (BIOO Scientific, Austin, TX, USA). Approximately, 1 µg of  
5 genomic DNA was sheared using Covaris S2 sonicator (Covaris, Woburn, MA, USA) to  
6 generate approximate fragment size distribution from 300 - 600 basepair (bp). The fragment  
7 size distribution was checked on Agilent 2200 Tape Station with D1000 DNA screen tapes  
8 and reagents (Agilent Technologies, Palo Alto, CA, USA) and subsequently purified using  
9 HighPrep magnetic beads (Magbio Genomics Inc, USA). The purified fragments were end-  
10 repaired, adenylated and ligated to Illumina multiplex barcode adaptors as per NEXTflex  
11 DNA sequencing kit protocol (BIOO Scientific, Austin, TX, USA).

12  
13 The adapter-ligated DNA was purified with HighPrep beads (MagBio Genomics, Inc,  
14 Gaithersburg, MD, USA) and then size selected on 2% low melting agarose gel and cleaned  
15 using MinElute column (QIAGEN). The resultant fragments were amplified for 10 cycles of  
16 PCR using Illumina-compatible primers provided in the NEXTFlex DNA sequencing kit. The  
17 final PCR product (sequencing library) was purified with HighPrep beads, followed by  
18 library quality control check. The Illumina-compatible sequencing library was initially  
19 quantified by Qubit fluorometer (Thermo Fisher Scientific, MA, USA) and its fragment size  
20 distribution was analyzed on Agilent TapeStation. Finally, the sequencing library was  
21 accurately quantified by quantitative PCR using Kapa Library Quantification Kit (Kapa  
22 Biosystems, Wilmington, MA, USA). The qPCR-quantified library was subjected to  
23 sequencing on an Illumina sequencer for 150 bp paired-end chemistry.

1 The Illumina-compatible sequencing library for the samples has a fragment size range  
2 between 275 - 425 bp for Paired-End Short Insert (PE-SI) and 350 - 650 bp for Paired-End  
3 Long Insert (PE-LI). As the combined adapter size is approximately 120 bp, the effective  
4 user-defined insert size is 155 - 305 bp and 230 - 530 bp for PE-SI and PE-LI, respectively.  
5 Libraries were sequenced in Illumina HiSeq platform with 150 PE chemistry.

## 7 **B. Mate-Pair library preparation and sequencing**

8 Mate Pair sequencing library was prepared with Illumina-compatible Nextera Mate Pair  
9 Sample Preparation Kit (Illumina Inc., Austin, TX, USA). Approximately, 4 ug of genomic  
10 DNA was simultaneously fragmented and tagged with Mate Pair adapters in a transposon-  
11 based tagmentation step. Tagmented DNA was then purified using AMPure XP Magnetic  
12 beads (Beckman Coulter Life Sciences, Indianapolis, IN, USA) followed by strand  
13 displacement to fill gaps in the tagmented DNA. Strand displaced DNA was further purified  
14 with AMPure XP beads before size-selecting the 3 - 5 kilobases (kb), 5 - 7 kb & 7 - 10 kb  
15 fragments on low melting agarose gel. The fragments were circularized in an overnight blunt-  
16 end intra-molecular ligation step, which will result in circularization of DNA with the insert  
17 mate pair adapter junction. The circularized DNA was sheared using Covaris S220 sonicator  
18 (Covaris, Woburn, MA, USA) to generate approximate fragment size distribution from 300 -  
19 1000 bp. The sheared DNA was purified to collect the mate pair junction positive fragments  
20 using Dynabeads M-280 Streptavidin Magnetic beads (Thermo Fisher Scientific, Waltham,  
21 MA, USA). The purified fragments were end-repaired, adenylated and ligated to Illumina  
22 multiplex barcode adaptors as per Nextera Mate Pair Sample Preparation Kit protocol.

23  
24 The adapter-ligated DNA was then amplified for 15 cycles of PCR using Illumina-compatible  
25 primers. The final PCR product (sequencing library) was purified with AMPure XP beads,

1 followed by library quality control check. The Illumina compatible sequencing library was  
2 initially quantified by Qubit fluorometer (Thermo Fisher Scientific, MA, USA), and its  
3 fragment size distribution was analyzed on Agilent TapeStation. Finally, the sequencing  
4 library was accurately quantified by quantitative PCR using Kapa Library Quantification Kit  
5 (Kapa Biosystems, Wilmington, MA, USA). The qPCR quantified libraries were pooled in  
6 equimolar amounts to create a final multiplexed library pool for sequencing on an Illumina  
7 sequencer.

### 9 **C. Oxford Nanopore MinION library preparation and sequencing**

10 Genomic DNA (1.5µg) was end-repaired (NEBnext ultra II end repair kit, New England  
11 Biolabs, MA, USA), cleaned up with 1x AmPure beads (Beckmann Coulter, USA). Adapter  
12 ligations were performed for 20 minutes using NEB blunt/TA ligase (New England Biolabs,  
13 MA, USA). Library mix were cleaned up using 0.4X AmPure beads (Beckmann Coulter,  
14 USA) and eluted in 25 µl of elution buffer. Eluted library was used for sequencing. Whole  
15 genome library were prepared by using ligation sequencing SQK-LSK108 Oxford Nanopore  
16 sequencing kit (ONT, Oxford, UK). Sequencing was performed on MinION Mk1b (ONT,  
17 Oxford, UK) using SpotON flow cell (FLO-MIN106) in a 48 hour sequencing protocol on  
18 MinKNOW (1.1.20 from ONT).

### 20 **Raw data quality control and processing**

#### 21 **A. Illumina raw data quality control and processing**

22 The Illumina reads were de-multiplexed using Illumina bcl2fastq. The Illumina generated  
23 raw data for genomic libraries was quality checked using FastQC  
24 (<http://www.bioinformatics.babraham.ac.uk/projects/fastqc/>) (Andrews, S., 2010). The  
25 paired-end Illumina reads were processed for clipping the adapter and low-quality bases

1 using customized script which retains minimum 70% bases/reads with Phred score ( $Q \geq 30$  in  
2 each base position) with a read length of 50 bp. The MP libraries were trimmed for adapter  
3 and low-quality base trimming from the 3'-end using PLATANUS internal trimmer  
4 (<http://platanus.bio.titech.ac.jp/>) [11].

## 6 **B. Oxford Nanopore reads base calling and processing**

7 The raw data were then base-called with the cloud-based Metrichor workflow 2D Basecalling  
8 plus Barcoding by Metrichor (V.2.43.1 from ONT,  
9 <https://nanoporetech.com/products/metrichor>). The Oxford Nanopore reads were processed  
10 using Poretools [12] for converting fast5 files to fasta format. For further quantification and  
11 analysis the 2D reads or 1D high quality reads were selected for further assembly.

## 13 ***De novo* genome assembly and genome size estimation**

14 The quality checked Oxford Nanopore reads were error-corrected using Illumina PE reads.  
15 For error-correction the Illumina PE-reads were aligned to the Nanopore reads by using  
16 BWA aligner [13]. The paired-end reads were assembled using Abyss [14] followed by  
17 contig extension using Oxford Nanopore reads using SSPACE-LongRead [15]. Super  
18 scaffolding of the assembled scaffold was performed using SSPACE [16] and PLATANUS  
19 (<http://platanus.bio.titech.ac.jp/>) using the Oxford Nanopore and Matepair data. Final draft  
20 genome resulted after gap closure by GAPCLOSER  
21 (<http://sourceforge.net/projects/soapdenovo2/files/GapCloser/>) and PLATANUS gap\_close  
22 tool (<http://platanus.bio.titech.ac.jp/>) using Illumina data. The genome size was estimated  
23 using a k-mer distribution plot using JELLYFISH [17]. The assembly and annotation  
24 workflow has been represented in Figure 2.



## 1 **Identification of repetitive elements and SSR markers**

2 Repetitive elements, retrotransposons and DNA transposons were identified in the draft  
3 genome and was hard masked by using reference genomic repeats of *G. gallus* using  
4 Repeatmasker tool ([www.repeatmasker.org/](http://www.repeatmasker.org/)). Final assembled scaffolds were analysed for  
5 Simple Sequence Repeats (SSR) identification. SSRs like the di, tri, tetra, penta and hexa-  
6 nucleotide repeats in the genome were obtained using MISA (Version 1.0.0) ([http://pgrc.ipk-  
7 gatersleben.de/misa/](http://pgrc.ipk-gatersleben.de/misa/)).

## 9 **Annotation of the draft genome**

10 Gene models were predicted on a hard-masked draft genome using AUGUSTUS  
11 (<http://augustus.gobics.de/>) with *G. gallus* (red junglefowl the chicken) as a reference model.  
12 The predicted proteins were annotated by using BLASTP [18] against the NCBI NR (non-  
13 redundant) database with default parameters at E-value cutoff of 1E-5.

14 The predicted proteins were searched against the KEGG-KAAS server  
15 (<http://www.genome.jp/tools/kaas/>) for pathway analysis [19]. *G. gallus*, *M. gallopavo*  
16 (turkey), *Taeniopygia guttata* (zebra finch), *Falco peregrinus* (peregrine falcon) were used as  
17 reference organism for pathway identification. The EuKaryotic Orthologous Groups (KOGs)  
18 (<https://genome.jgi.doe.gov/portal/help/kogbrowser.jsf>) were predicted using homology-  
19 based approach.

## 21 **Prediction of protein domains**

22 Predicted proteins from peacock, chicken and turkey with sequence length greater than 100  
23 amino acids were considered for protein domain analysis. All the protein sequences from  
24 each organism were searched against Pfam-A database (<http://pfam.sanger.ac.uk/>) using

1 Pfam scan (<https://www.ebi.ac.uk/seqdb/confluence/display/THD/PfamScan>) for protein  
2 domain identification.

#### 4 **Identification of avian protein families**

5 A total of 748,544 protein sequences from 49 avian species (including peacock proteins from  
6 this study) and others were downloaded from <http://avian.genomics.cn/en/jsp/database.shtml>.  
7 Sequences greater than 100 amino acids from all the avian genomes were selected and  
8 concatenated to a single fasta file. These sequences were clustered using CD-HIT [20] with  
9 70% alignment coverage for the shorter sequence with a length difference cutoff of 0.7. The  
10 single copy gene family orthologs present across all avian species and not clustered peacock  
11 proteins were annotated.

#### 13 **Phylogenetic tree construction**

14 For phylogenetic tree construction we considered single copy gene clusters present as single  
15 copy in all the avian species. These protein sequences from each species were concatenated  
16 and were further aligned by multiple sequence alignment tool Clustalw  
17 (<http://www.clustal.org/clustal2>). The poorly aligned positions and divergent regions were  
18 removed using Gblock tool (<http://molevol.cmima.csic.es/castresana/Gblocks.html>). The  
19 fasta format sequences were converted to phylip format using Phylip tool  
20 (<http://evolution.genetics.washington.edu/phylip/getme-new1.html>). Phylogenetic trees were  
21 constructed using IQ-TREE version 1.5.6 ([www.iqtree.org](http://www.iqtree.org)). The parameters used for  
22 phylogenetic tree construction were ultrafast bootstrap (UFBoot, using the `-bb` option of 1000  
23 replicates), and a standard substitution model (`-st AA -m TEST`) and `alrt 1000 -nt AUTO`  
24 was given for tree generation. The generated trees from IQ-TREE tool were visualized using  
25 Figtree (<http://tree.bio.ed.ac.uk/software/figtree/>) and the Branch-support values were recorded

1 from the output “.treefile”. The trees were modified for better visualization under Trees  
2 section an increasing order nodes were applied.

#### 4 **Genome conservation analysis**

5 Draft chromosome visualizations were constructed by aligning the assembled peacock  
6 genome against the *G. gallus* with the Chromosomer tool  
7 (<https://github.com/gtamazian/chromosomer>). The reordered assembled genome was aligned  
8 against the chicken genome using LAST aligner (<http://last.cbrc.jp/>) with NEAR (finding  
9 short-and-strong [near-identical] similarities) parameter allowing for substitution and gap  
10 frequencies, leading to the identification of orthologs. These query-mapped regions were  
11 filtered with a greater than 1% of the maximum length for visualization using Circos  
12 (<http://circos.ca/>).

## 14 **Results**

### 15 **Genome sequencing assessment**

16 A total of five libraries from Illumina HiSeq technology of 150 bp paired-end were  
17 generated. The short-insert reads of 489,114,747 accounted to genome coverage of 146.7X  
18 and long-insert reads of 302,884,819 sequences was about 90.9X coverage with a total  
19 coverage of 237.6X. Sequencing of three mate-pairs of 3-5Kb, 5-7Kb of and 7-10Kb yielded  
20 72,915,033, 47,440,144 and 36,464,628 reads, respectively with an approximate coverage of  
21 21.9X, 14.2X and 10.9X, respectively, with a grand total of 156 million mate-pair reads of  
22 47X coverage. Oxford Nanopore technology was used to generate 366,323 long reads having  
23 of 2,398,560,283 bp with coverage of 2.3X. The complete genome sequencing was generated  
24 to a depth of ~287X from both Illumina and Oxford Nanopore platform (Table 1). The  
25 coverage was based on the assumption that the peacock genome size of about 1 Gb.

## 2 **Genome assembly**

3 The first assembly was performed on Illumina reads with Abyss *de novo* assembler that  
4 resulted in ~932 Mb (mega base) of genome with an N50 of 1639 bp. The extension of the  
5 contigs were performed with Oxford Nanopore reads, which generated scaffolds with N50 of  
6 14,748 bp. Super scaffolding of the assembled scaffold was performed using SSPACE and  
7 PLATANUS with MP libraries that generated ~916 Mb genome with the N50 value of  
8 168,140 bp. The final gap closer was executed using GAPCLOSER program with MP and  
9 PE-LI libraries, which generated a draft genome of 1.02 GB (giga base). The draft genome  
10 assembly of *Pavo cristatus* consists of 179,346 bp scaffolds, with a N50 of 189,886 bp with  
11 37 scaffolds, having sequence length  $\geq 1$  Mbp. Contigs above 5000 bp have covered a  
12 genome of ~0.915 Mb with N50 0.23 Mb. In the assembled genome there were ~0.4% of  
13 non-ATGC characters (Table 2).

## 15 **Repetitive genome elements and SSR markers**

16 A total of 75,315,566 bp (7.33%) of the peacock genome was estimated to consist of repeat  
17 sequences (Table S1). In the genome about 56,511,635 bp (5.5%) of retrotransposons (class  
18 I) were identified as the NON-LTR elements (LINEs (4.7%), SINEs (0.08%) and LTR  
19 elements (0.72%). Subsequently, the DNA transposons (class II) of 7,277,390 bp (0.71%)  
20 and unclassified elements of about 467,719 (0.05%) were identified (Table S1). The median  
21 percentages of LINEs, SINEs, LTR, DNA, unknown and total masked bases of other avian  
22 birds were 3.94, 0.11, 1.31, 0.22, 0.85 and 6.93, respectively (Table S2).

24 A total of 399,493 SSRs were obtained from the peacock genome assembly. The largest  
25 fraction of SSRs identified were mono-nucleotide (60.04%), followed by tetra-nucleotide

1 (26%), di-nucleotide (8.51%), tri-nucleotide (4.31%), penta-nucleotide (1.03%) and finally  
2 hexa-nucleotide (0.13%). Among the SSRs identified, A (49.2%) and T (44.9%) accounted  
3 for 94.1% of the mono-nucleotide repeats. AT (23.8%), TA (16.5%), TG (13.7%), AC  
4 (10.6%) and CA (10.32%) accounted for 75% of the di-nucleotide repeats, whereas TTG  
5 (9.9%), AAT (9.6%), AAC (9.4%), TTA (7.1%), ATT (4.5%), TAA (3.5%), CAA (3.1%)  
6 and GGA (2.69%) accounted for 49.7% of the tri-nucleotide repeats (Table S3).

### 8 **Gene prediction and annotation**

9 A total of 23,153 proteins were predicted from the assembled draft peacock genome using  
10 AUGUSTUS. Among them, 21,854 (94.4%) predicted proteins showed homology to other  
11 sequences from the NCBI NR database (Fig. 3). The top four organisms where the peacock  
12 proteins showed homology belonged to the *G. gallus* with 11,398 proteins, *M. gallopavo* with  
13 4059 proteins, *Amazona aestiva* (blue-fronted Amazon parrot) with 1352 proteins and *Anas*  
14 *platyrhynchos* (mallard the duck) with 849 proteins. The detail annotations of all the proteins  
15 are available in Table S4.

17 Gene Ontology (GO) descriptions were assigned for a total of 18,294 (79%) peacock  
18 proteins. Among them, 14,489 proteins have molecular function; 11,678 have biological  
19 process and 13,735 proteins have cellular component as functional categories (Table S4). A  
20 total of 4091 (17.7%) peacock proteins were found to have pathway information from the  
21 KEGG database (Table S5), whereas a total of 20,937 (88.1%) peacock proteins found a  
22 similarity against the KOG annotations (Table S6). The peacock proteins when searched  
23 against the Human proteins showed expansions in cell morphogenesis, neuronal projection  
24 and development and GTPases (Table S7 and Fig. S3).

## 1 **Analysis of avian protein families**

2 A total of 748,544 protein sequences from 49 avian species have 653,497 protein sequences  
3 of length above 100 amino acids (Table S8A). Based on the level of identity CD-HIT  
4 clustered all the proteins into a total of 114,121 gene clusters. Among them, 68 highly  
5 homologous gene clusters were present as single copy in all the 49 avian species (Table S8B  
6 and Table S8C). We also observed 13,860 protein clusters of peacock species not clustered  
7 with other species (Table S8D).

## 9 **Phylogenetic analysis**

10 The phylogenetic analysis of 48 avian species along with peacock genome showed clustering  
11 of the *P. cristatus* species in a clade of *G. gallus* (chicken), *M. gallopavo* (turkey), *A.*  
12 *platyrhynchos* (mallard the duck), *Tinamus guttatus* (white-throated tinamou) and *Struthio*  
13 *camelus* (ostrich). This is the largest clade with six species having a bootstrap support of a  
14 100. In the aforementioned clade, except the mallard species all belong to flightless or low  
15 flying birds. The bootstrap support between *P. cristatus* and *G. gallus* were 96, followed by  
16 *M. gallopavo* of 100 bootstrap support (Fig. 4).

## 18 **Comparison with other species and databases**

19 Predicted proteins from peacock, chicken and turkey when searched for the conserved Pfam  
20 protein domains showed about 81% of the domains that were common among these three  
21 species (Fig. 5, Table S9). In comparison with the total Pfam domains from all the three  
22 species, 94%, 98.4% and 99.7% Pfam domains were present in peacock, chicken and turkey,  
23 respectively. However, 255, 69 and 14 Pfam domains were absent among the species  
24 comparisons, respectively (Table S9H).

1 There were 15,470 (78%), 12,794 (85%) and 11,745 (85%) of the peacock, chicken and  
2 turkey proteins found to contain a match to Pfam domains, respectively (Table S9). The  
3 domain comparisons among the species showed gene family expansions such as kinases, Zn  
4 finger proteins, GTPases and others in either one of the species (Fig. 6). Commonly, a total of  
5 9974 peacock proteins were found to have annotation in all the four databases NCBI-NR,  
6 KOG, Pfam and GO (Fig. 7). The assembled peacock genome when reordered for pseudo  
7 chromosomes generation against the masked 1.21 GB chicken genome [21] showed a 597  
8 MB reordered peacock genome (Fig. 8). There are around 60 different avian species that have  
9 been sequenced by using various sequencing technologies (Table S10). The sequencing depth  
10 varies from as low as 6x to maximum of 390x coverage. The result obtained from different  
11 bioinformatics methods to assemble the sequencing data are measured as scaffold N50 that is,  
12 from 30 kb to 14 Mb.

## 15 **Conclusions**

16 A rapid surge in de-novo genome sequence assembly of diverse species is seen in recent years. This is  
17 essentially driven largely due to an affordable cost per base sequencing along with the development of  
18 smarter algorithms refined and equipped to handle large data sets. The challenge of newer genome  
19 analysis pipeline lies in generating assembly with lower contig numbers and longer contigs per  
20 genome. To achieve this, technologies that generate longer reads or greater read depths are found to  
21 be very helpful; but most importantly combination of different sequencing technologies play a  
22 significant role in improving genome assemblies (Table S10). Libraries generated using different  
23 chemistry have been found to be superior on improving assemblies. Further, a combination of  
24 different sequencing platform like Illumina when used in combination with other technologies like  
25 Sanger sequencing, Pacbio and ONT have shown to reduce the number of scaffolds even with very  
26 low coverage. Thus, we need to consider combination of sequencing technologies, along with using

1 different bioinformatics software to obtain assembly with fewer number or scaffolds or closer to  
2 chromosome-level.

3  
4  
5  
6  
7 4 In comparison with other avian genomes [22], the 290X sequencing depth generated for peacock is  
8  
9 5 one of the highest. The final draft genome assembly of peacock resulted in N50 of 0.23 MB. Inclusion  
10  
11 6 of 2.3X of reads from Oxford Nanopore helped the assembly to improve by 26.2% reduction in the  
12  
13 7 number of scaffolds and about 50.7% and 115% increase in the scaffold and contig N50, respectively.  
14  
15 8 The draft assembly contained less than 0.4% of unknown nucleotides, which is very low for a draft  
16  
17 9 assembly. Thus, we have shown for the first time in avian genomics how the low-cost third generation  
18  
19 10 sequencing data from Oxford Nanopore can play a significant role in improving the genomes draft  
20  
21 11 assembly. Assemblies with longer scaffolds will further benefit in understanding the organisms with  
22  
23 12 structurally complex regions, repeat elements and isoforms in the genome [23].  
24  
25  
26  
27  
28

29 14 Comparisons of the genome features of peacock against other species in different genomic databases  
30  
31 15 have shown about 95% homology (Fig. 7). The genome sequence also gives insights on its genetic  
32  
33 16 lineage and evolution with relation to the other avian members. The estimated median divergence  
34  
35 17 time of *P. cristatus* from *G. gallus* is of about 35 million years ago (MYA), whereas between *G.*  
36  
37 18 *gallus* and *M. gallopavo* is about 37 MYA [24]. The huge gap of other avians to peacock is due to  
38  
39 19 non-availability of genome sequences from other avians. The gap can be by sequencing other avian  
40  
41 20 species. Among the vertebrates, it has been observed that the variations in TEs among avians are very  
42  
43 21 low [25] (Table S8). The genome complexities of a species are influenced by the transposable  
44  
45 22 elements (TE) that are believed to play a crucial role [26]. In this peacock genome assembly,  
46  
47 23 inclusion of Oxford Nanopore long read sequences has significantly improved the assembly, thus,  
48  
49 24 helping in resolving across the repetitive regions in genome. Their roles in development and evolution  
50  
51 25 of the peacocks need to be further explored.  
52  
53  
54  
55  
56  
57

58 27 The genome information of peacock can be valued and explored by avian enthusiasts to further  
59  
60 28 understand about the avian world. Though not yet critically endangered in India, peafowl population  
61  
62  
63  
64  
65



1 is surely at a declining trend in the wild due to massive deforestation, habitat loss [27] and increased  
2 poaching for meat and feathers. Our genome sequencing initiative of *Pavo cristatus* is not only  
3 valuable from a conservational viewpoint, but also to preserve a heritage associated with this bird that  
4 runs through centuries and that bears a strong attachment to the national psyche.

## 6 **Availability of supporting data**

7 Supplementary data contains, read statistics, annotation, repeats identification, orthology  
8 analysis, assembly and annotation. Figures, Gene ontology and annotations. Additional data  
9 are available from <https://biit.cs.ut.ee/supplementary/peacock/>

## 11 **Raw Data and genome assembly in SRA**

12 Raw reads (Illumina and Oxford Nanopore) are available in the Sequence Read Archive  
13 (SRA), and the Whole Genome Shotgun project has been deposited at GenBank under SRA  
14 Submission ID: SUB3108024, Bioproject: PRJNA413288 and Biosamples  
15 SUB3108018/SAMN07739105 : SKPea2016\_SI, SUB3108017/SAMN07739104 :  
16 SKPea2016\_LI, SUB3107930/SAMN07739101 : FPL\_3\_5KB,  
17 SUB3108015/SAMN07739102 : FPL\_5\_7KB, SUB3108016/SAMN07739103 :  
18 FPL\_7\_10KB and SUB3108020/SAMN07739107 : FPL\_Nano (Table 1). The *de novo*  
19 genome assembly can be accessed under SUB4504869/ SAMN07739105.

## 21 **Competing interests**

22 The author(s) declare that they have no competing interests.

## 24 **Authors contributions**

1 RD, AS, KP performed wet lab experiments; RD designed work plan, experiments and  
2 logistics; SS, VR, KP SG IM and AR assisted with the work; RS provided samples from bird;  
3 BR, SK performed data analysis and interpretation; BR, SK drafted the manuscript and SK  
4 overseen the whole project.

## 7 **Acknowledgements**

8 Department of Biochemistry, AIIMS, New Delhi for providing space and infrastructure to  
9 carry on the work. RD for providing partial funding. Raja, Sudha from Genotypic  
10 Technology and their team Deepti, Shalini, Nagu, Abhi and Manish for providing sequencing  
11 services. BR acknowledges IUT 34-4.

1 **Tables**

2 Table 1. Raw data statistics of Illumina HiSeq and Nanopore reads of the peacock genome.

| Sample               | Platform | Library and chemistry | Number of reads | Coverage | SRA ID                      |
|----------------------|----------|-----------------------|-----------------|----------|-----------------------------|
| SO_6221_SKPea2016_SI | HiSeq    | PE – SI (150 * 2)     | 489114747       | 146.73   | SUB3108018,<br>SAMN07739105 |
| SO_6221_SKPea2016_LI | HiSeq    | PE – LI (150 * 2)     | 302884819       | 90.87    | SUB3108017,<br>SAMN07739104 |
| SO_6221_FPL_3_5KB    | HiSeq    | MP (150 * 2)          | 72915033        | 21.87    | SUB3107930,<br>SAMN07739101 |
| SO_6221_FPL_5_7KB    | HiSeq    | MP (150 * 2)          | 47440144        | 14.23    | SUB3108015,<br>SAMN07739102 |
| SO_6221_FPL_7_10KB   | HiSeq    | MP (150 * 2)          | 36464628        | 10.94    | SUB3108016,<br>SAMN07739103 |
| SO_6221_NP           | Nanopore | 5 - 341124            | 366323          | 2.3      | SUB3108020,<br>SAMN07739107 |

3  
4 Abbreviations used, PE = Paired end, SI = Short Insert, LI = Long insert, MP = Mate pair, NP = Nano pore and

5 KB = Kilo Bases

6 Table 2. *De novo* assembly statistics of the peacock genome.

| Description      | Contigs     | Nanopore Scaffold | Super Scaffolds | GapClosed     | >1000 Kb    | >5000 Kb    |
|------------------|-------------|-------------------|-----------------|---------------|-------------|-------------|
| Contigs          | 685,241     | 281,272           | 179,346         | 179,332       | 34,178      | 15,025      |
| Maximum Length   | 49,159      | 251,510           | 2,390,121       | 2,488,982     | 2,488,982   | 2,488,982   |
| Minimum Length   | 300         | 5                 | 265             | 265           | 1000        | 5000        |
| Average Length   | 1360        | 3250              | 5111            | 5729          | -           | -           |
| Total Length     | 932,162,464 | 914,363,908       | 916,720,956     | 1,027,510,962 | 954,449,349 | 915,342,012 |
| Length >= 100 bp | 685,241     | 281,271           | 179,346         | 179,332       | 34,178      | 15,025      |
| Length >= 200 bp | 685,241     | 281,271           | 179,346         | 179,332       | 34,178      | 15,025      |
| Length >= 500 bp | 616,120     | 186,433           | 93,727          | 93,718        | 34,178      | 15,025      |
| Length >= 1 Kbp  | 363,428     | 104,479           | 34,168          | 34,178        | 34,178      | 15,025      |
| Length >= 10 Kbp | 1591        | 24,748            | 9249            | 10,310        | 10,310      | 10,310      |
| Length >= 1 Mbp  | 0           | 0                 | 27              | 37            | 37          | 37          |
| Non-ATGC #       | 350,325     | 42,696,911        | 49,169,831      | 4,043,129     | 4,040,790   | 3,986,487   |
| Non-ATGC %       | 0.038       | 4.67              | 5.36            | 0.393         | 0.423       | 0.436       |
| N50 value        | 1639        | 14,748            | 168,140         | 190,304       | 218,023     | 232,312     |

7

8

1 **Figure legend**

2 **Figure 1.** The beautiful and charismatic photo of Indian blue peacock (*Pavo cristatus*) bird.

3 **Figure 2.** Detailed workflow for *de novo* whole genome assembly and annotation.

4 **Figure 3.** Peacock proteins showing homology. Pie chart showing significant similarity  
5 scores of peacock proteins against the NR database.

6 **Figure 4.** Phylogenetic tree generated from homologous proteins from 49 different avian  
7 species.

8 **Figure 5.** Venn diagram showing common and not present protein family domains (Pfam)  
9 between peacock, chicken and turkey proteins.

10 **Figure 6.** Heatmap showing protein family (Pfam) distributed in peacock, chicken or turkey  
11 species. The number represents the Pfam domain count predicted from the protein sequences.  
12 Pfam domains of 50 and above identified in any one of the species are compared in the  
13 heatmap.

14 **Figure 7.** Venn diagram showing peacock proteins showing significant homology to NR  
15 database, KOG, Pfam and GO ontologies.

16 **Figure 8.** Circular image of the assembled peacock genome aligned against the *G. gallus*  
17 genome using Chromosomer tool. Draft chromosomes were generated by similarity between  
18 scaffolds that were arranged on the reference chicken genome. Circos was used for  
19 visualization. The right side of the image represents the reference chicken genome and left  
20 side of the image represents the peacock genome.

1 **References:**

- 2 1. Brickle, N. 2002. Habitat use, predicted distribution and conservation of green peafowl  
3 (*Pavo muticus*) in Dak Lak Province, Vietnam. *Biological Conservation*, 105: 189-197.  
4  
5 4  
6  
7 5 2. Jackson, C. 2006. *Peacock*. London: Reaktion Books Ltd.  
8  
9 6  
10 7 3. Gadagkar, R., 2003. Is the peacock merely beautiful or also honest?. *Current Science*,  
11 85(7), pp.1012-1020.  
12 8  
13 9  
14 10 4. Kushwaha, S., and Kumar, A. 2016. A Review on Indian Peafowl (*Pavo cristatus*)  
15 Linnaeus, 1758. *Journal of Wildlife and Research*, 4, 42-59.  
16 11  
17 12  
18 13 5. Kadgaonkar, Shivendra B. 1993. The peacock in ancient Indian art and literature.  
19 *Bulletin of the Deccan College Research Institute*, vol. 53, pp. 95–115. JSTOR,  
20 [www.jstor.org/stable/42936434](http://www.jstor.org/stable/42936434).  
21 15  
22 16  
23 17 6. Hillier LW, Miller W, Birney E, Warren W, International Chicken Genome Sequencing  
24 Consortium et al. 2004 Sequence and comparative analysis of the chicken genome  
25 provide unique perspectives on vertebrate evolution. *Nature* 432:695–716  
26 19  
27 20  
28 21 7. Zhang, G., Jarvis, E. D., and Gilbert, M. T. P. 2014. A flock of genomes. *Science* 346,  
29 1308–1309.  
30 22  
31 23  
32 24 8. Bejerano, G., Pheasant, M., Makunin, I., Stephen, S., Kent, W.J., Mattick, J.S. and  
33 Haussler, D., 2004. Ultraconserved elements in the human genome. *Science*,  
34 304(5675), pp.1321-1325.  
35 26  
36 27  
37 28 9. Burt, D.W., 2007. Emergence of the chicken as a model organism: implications for  
38 agriculture and biology. *Poultry science*, 86(7), pp.1460-1471.  
39 29  
40 30  
41 31 10. Furlong, R.F., 2005. Insights into vertebrate evolution from the chicken genome  
42 sequence. *Genome biology*, 6(2), p.207.  
43 32  
44 33  
45  
46  
47  
48  
49  
50  
51  
52  
53  
54  
55  
56  
57  
58  
59  
60  
61  
62  
63  
64  
65

- 1 11. Kajitani, R., Toshimoto, K., Noguchi, H., Toyoda, A., Ogura, Y., Okuno, M., Yabana,  
2 2 M., Harada, M., Nagayasu, E., Maruyama, H. and Kohara, Y., 2014. Efficient de novo  
3 3 assembly of highly heterozygous genomes from whole-genome shotgun short reads.  
4 4 Genome research, 24(8), pp.1384-1395.  
5 5  
6 6  
7 7  
8 8  
9 6 12. Loman, N. J. and Quinlan, A. R. 2014. Poretools: a toolkit for analyzing nanopore  
10 7 sequence data. Bioinformatics, 30(23), 3399-3401.  
11 8  
12 9  
13 9 13. Li H. and Durbin R. 2009. Fast and accurate short read alignment with Burrows-  
14 10 Wheeler Transform. Bioinformatics, 25:1754-60.  
15 11  
16 12 14. Birol, I., Jackman, S.D., Nielsen, C.B., Qian, J.Q., Varhol, R., Stazyk, G., Morin, R.D.,  
17 13 Zhao, Y., Hirst, M., Schein, J.E. and Horsman, D.E., 2009. De novo transcriptome  
18 14 assembly with ABySS. Bioinformatics, 25(21), pp.2872-2877.  
19 15  
20 16 15. Boetzer, Marten, and Walter Pirovano. 2014. SSPACE-LongRead: scaffolding bacterial  
21 17 draft genomes using long read sequence information. BMC bioinformatics 15.1: 211  
22 18  
23 19 16. Boetzer, M., Henkel, C.V., Jansen, H.J., Butler, D. and Pirovano, W., 2010. Scaffolding  
24 20 pre-assembled contigs using SSPACE. Bioinformatics, 27(4), pp.578-579.  
25 21  
26 22 17. Marcais, G and Kingsford, C. 2011. A fast, lock-free approach for efficient parallel  
27 23 counting of occurrences of k-mers. Bioinformatics 27(6): 764-770.  
28 24  
29 25 18. Altschul, S.F., Gish, W., Miller, W., Myers, E.W. and Lipman, D.J., 1990. Basic local  
30 26 alignment search tool. Journal of molecular biology, 215(3), pp.403-410.  
31 27  
32 28 19. Moriya, Y., Itoh, M., Okuda, S., Yoshizawa, A.C. and Kanehisa, M., 2007. KAAS: an  
33 29 automatic genome annotation and pathway reconstruction server. Nucleic acids  
34 30 research, 35(suppl\_2), pp.W182-W185.  
35 31  
36 32 20. Fu, L., Niu, B., Zhu, Z., Wu, S. and Li, W., 2012. CD-HIT: accelerated for clustering  
37 33 the next-generation sequencing data. Bioinformatics, 28(23), pp.3150-3152.  
38 34

- 1 21. Warren, W.C., Hillier, L.W., Tomlinson, C., Minx, P., Kremitzki, M., Graves, T.,  
2 Markovic, C., Bouk, N., Pruitt, K.D., Thibaud-Nissen, F. and Schneider, V., 2016. A  
3 new chicken genome assembly provides insight into avian genome structure. *G3:*  
4 *Genes, Genomes, Genetics*, pp.g3-116.  
5  
6  
7  
8  
9 22. Zhang, G., Li, C., Li, Q., Li, B., Larkin, D.M., Lee, C., Storz, J.F., Antunes, A.,  
10 Greenwold, M.J., Meredith, R.W. and Ödeen, A., 2014. Comparative genomics reveals  
11 insights into avian genome evolution and adaptation. *Science*, 346(6215), pp.1311-  
12 1320.  
13  
14  
15  
16  
17  
18 23. Goodwin, S., McPherson, J.D. and McCombie, W.R., 2016. Coming of age: ten years  
19 of next-generation sequencing technologies. *Nature Reviews Genetics*, 17(6), p.333.  
20  
21  
22  
23 24. Kumar S, Stecher G, Suleski M, Hedges SB., 2017. TimeTree: A Resource for  
24 Timelines, Timetrees, and Divergence Times. *Mol Biol Evol* 34 (7): 1812-1819  
25  
26  
27  
28  
29 25. Sotero-Caio, C.G., Platt, R.N., Suh, A. and Ray, D.A., 2017. Evolution and diversity of  
30 transposable elements in vertebrate genomes. *Genome biology and evolution*, 9(1),  
31 pp.161-177.  
32  
33  
34  
35  
36 26. Kapusta, A. and Suh, A., 2017. Evolution of bird genomes—a transposon's-eye view.  
37 *Annals of the New York Academy of Sciences*, 1389(1), pp.164-185.  
38  
39  
40  
41  
42 27. Ramesh, K. and McGowan, P., 2009. On the current status of Indian peafowl *Pavo*  
43 *cristatus* (Aves: Galliformes: Phasianidae): keeping the common species common.  
44 *Journal of Threatened Taxa*, 1(2), pp.106-108.  
45  
46  
47  
48  
49  
50  
51  
52  
53  
54  
55  
56  
57  
58  
59  
60  
61  
62  
63  
64  
65

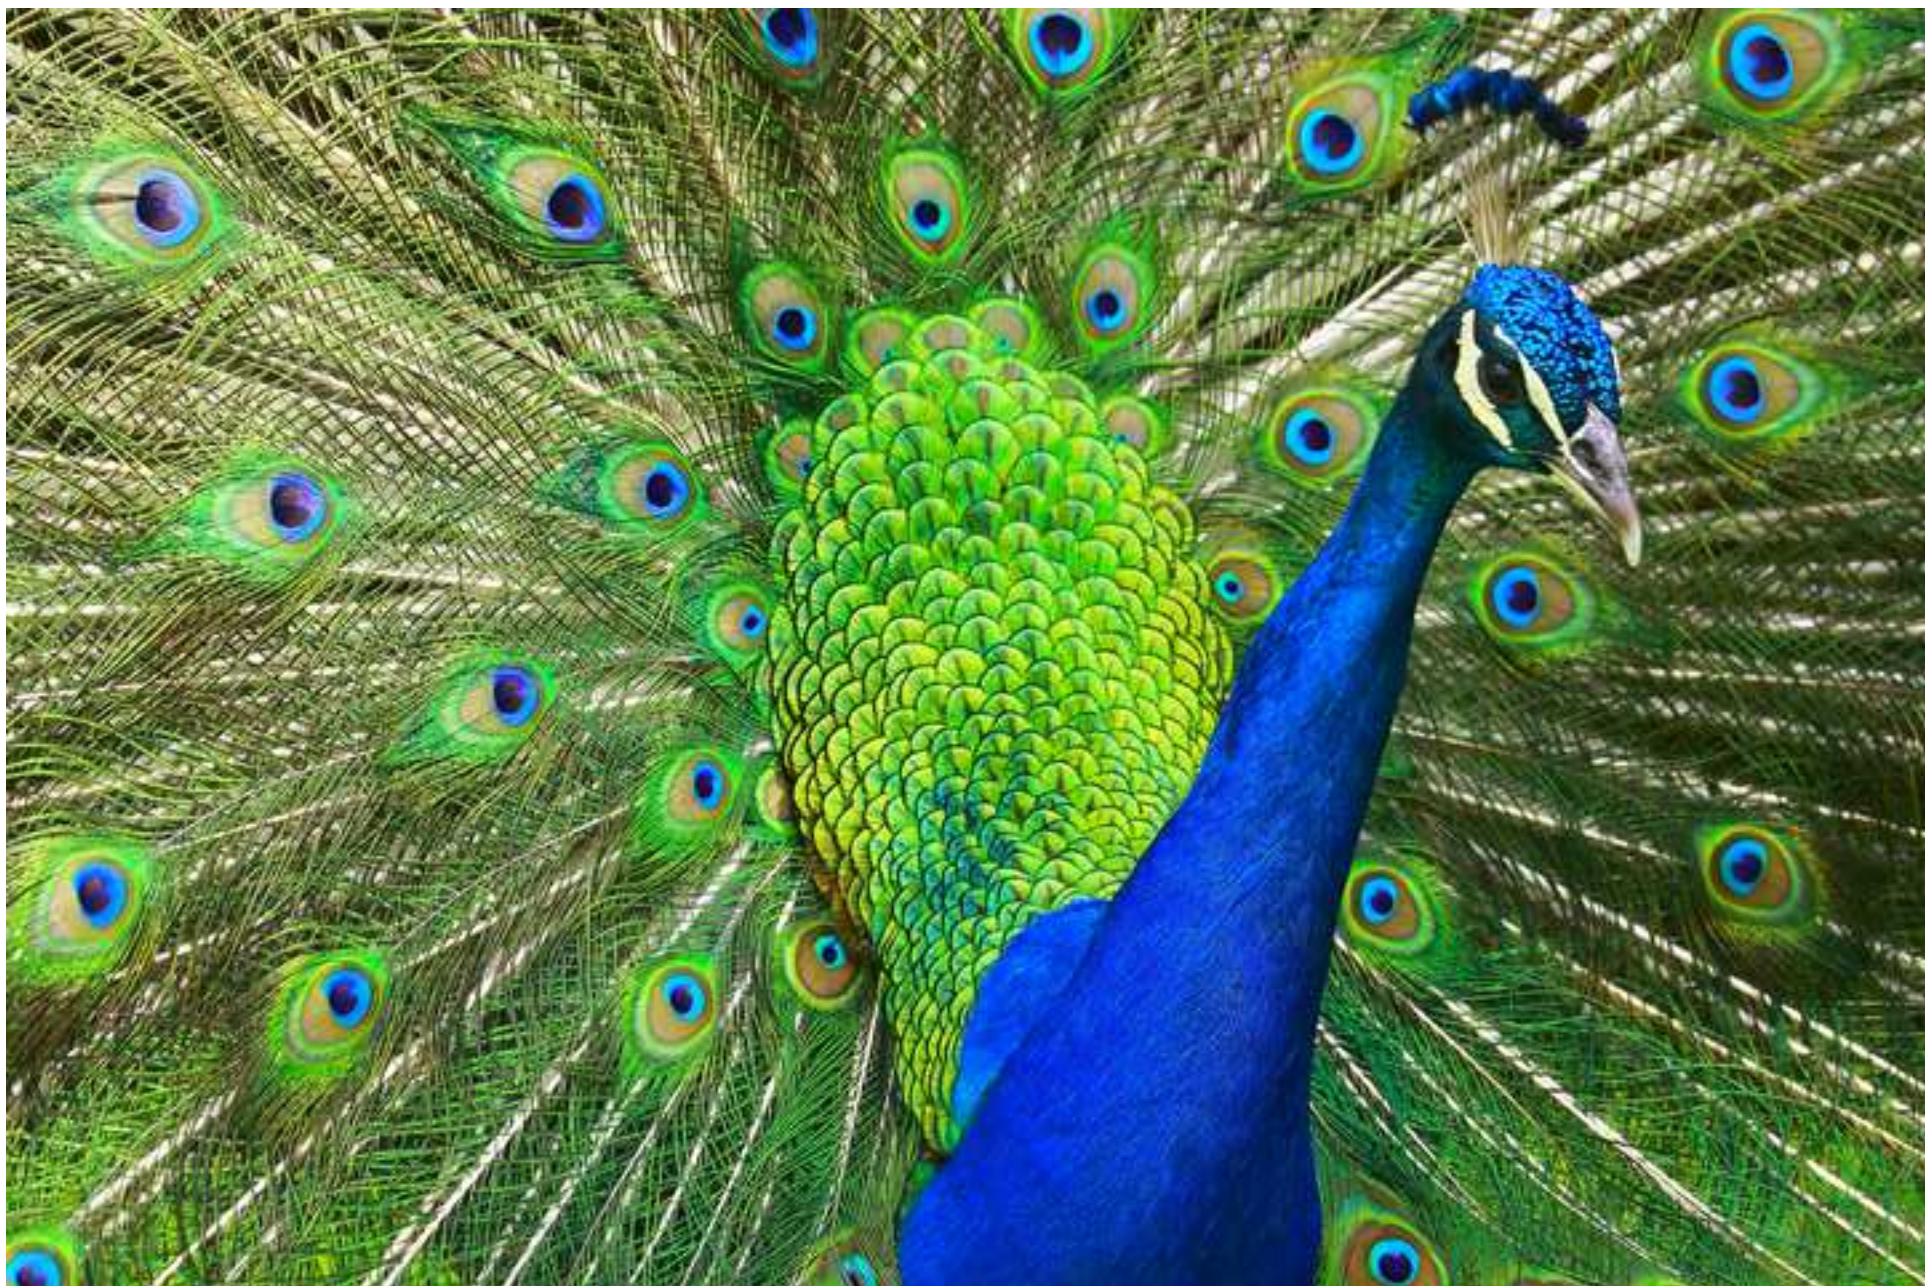



Figure 2

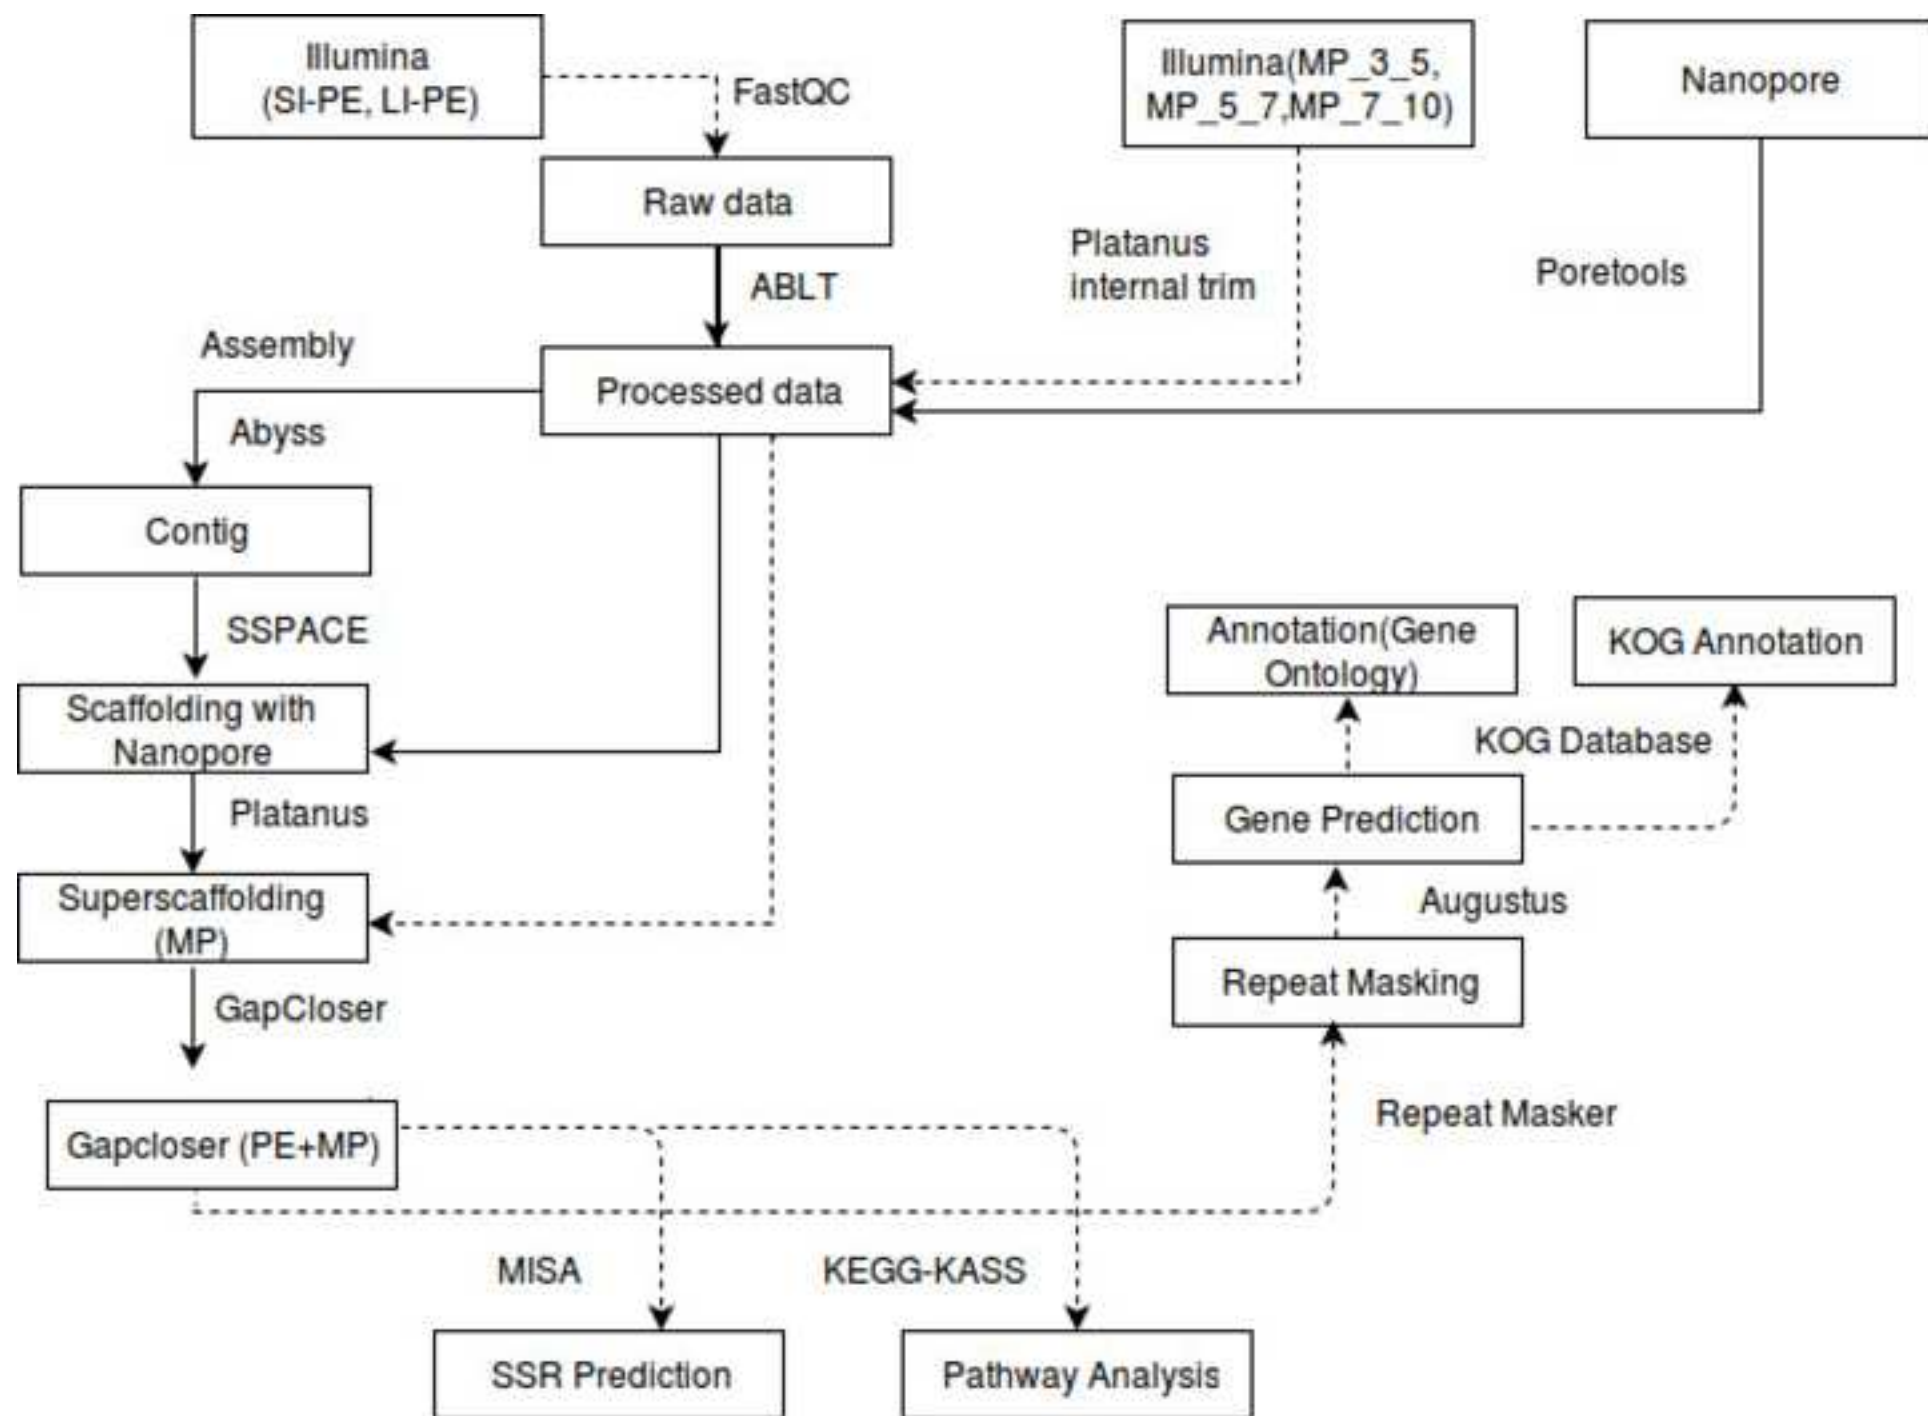

Figure 3

[Click here to access/download;Figure;Fig 3; Similarity scores against the Uniprot database.pdf](#)

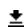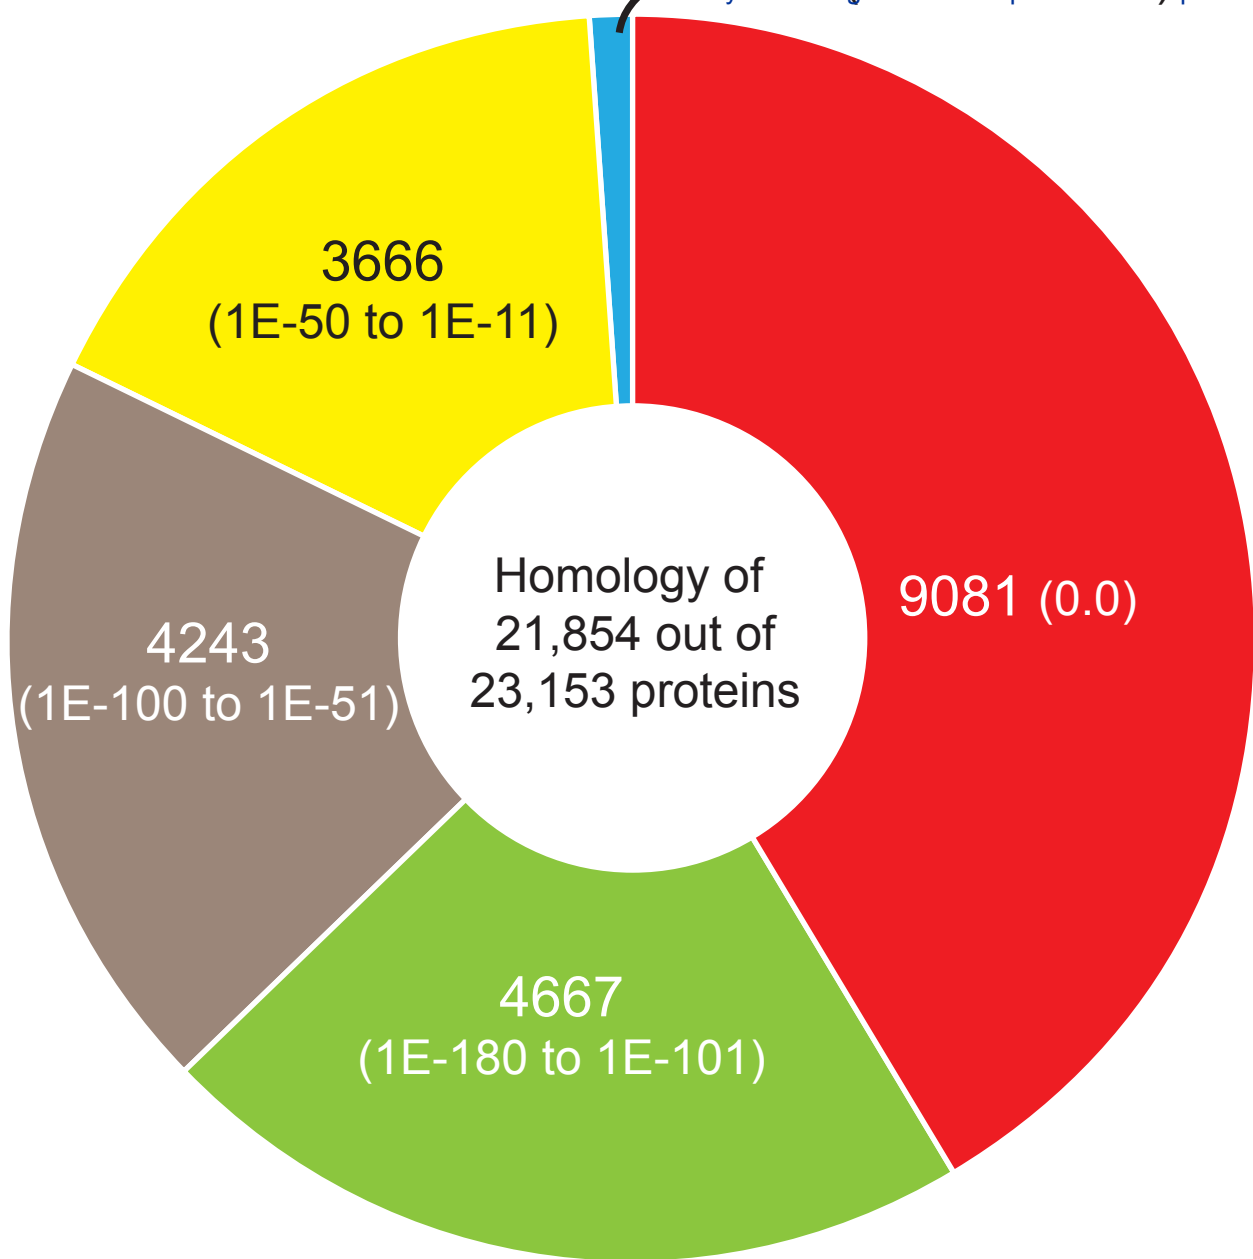

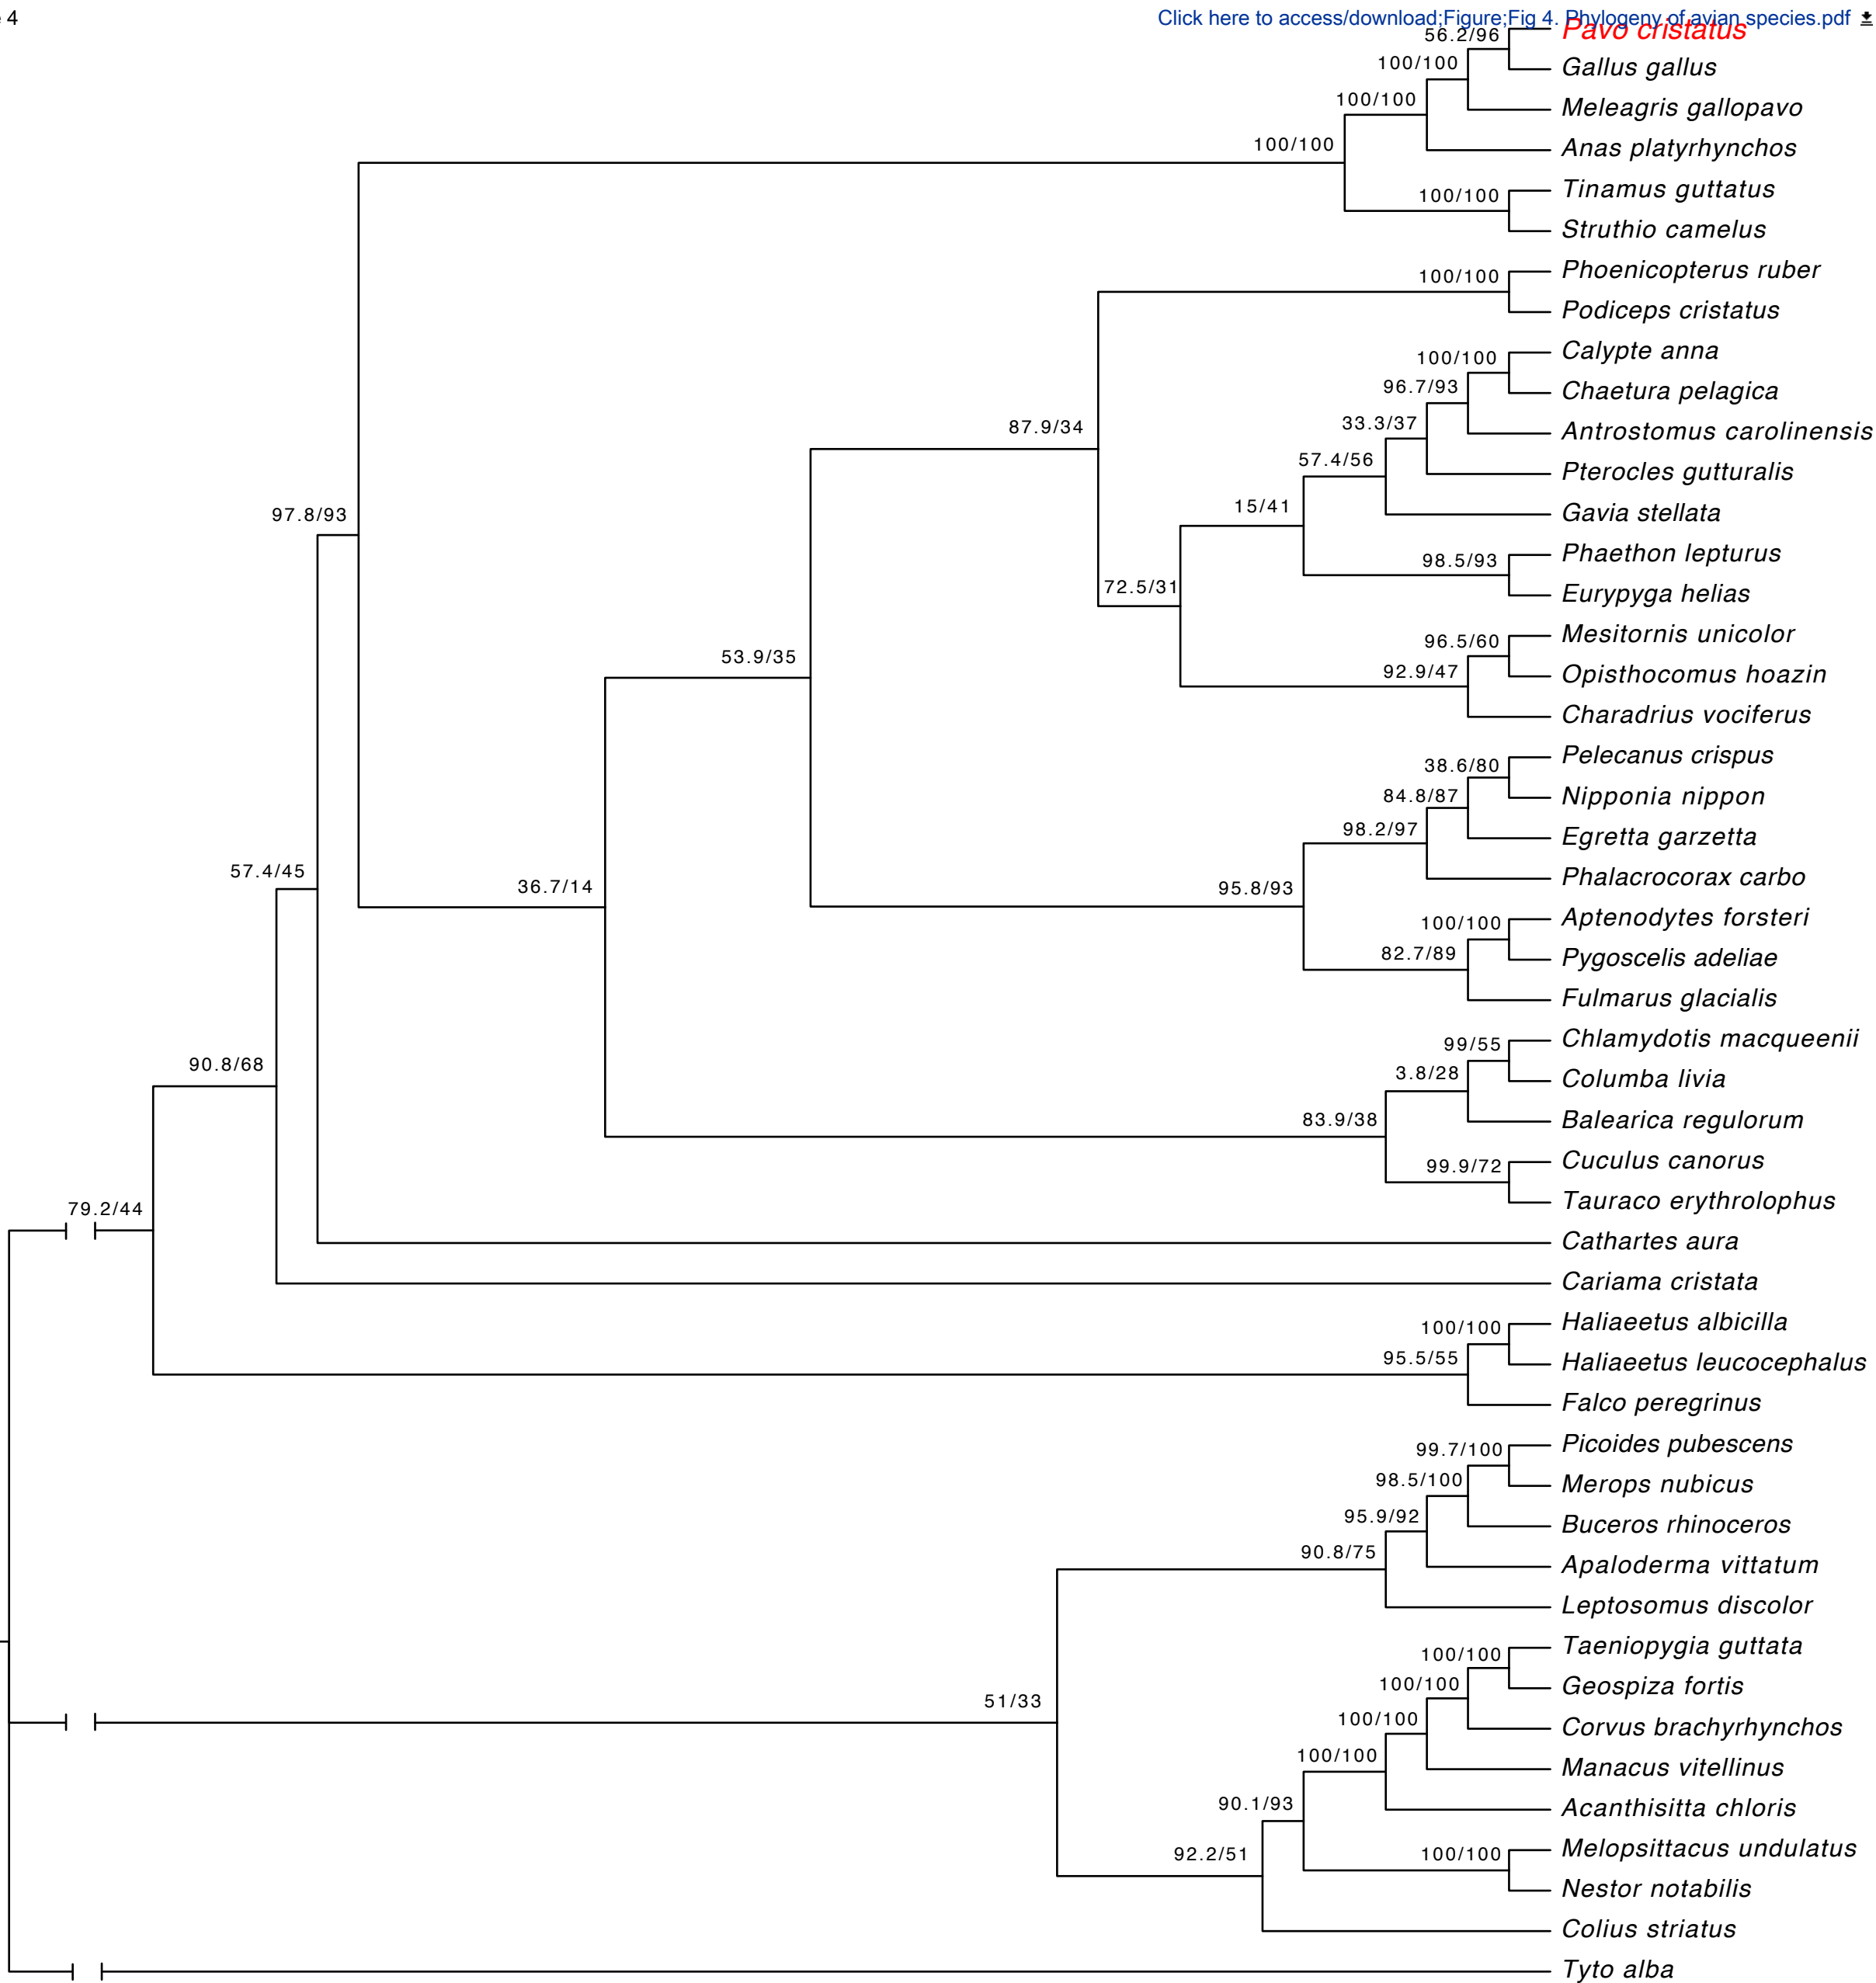

Figure 5

[Click here to access/download;Figure;Fig 5.](#) Unique Pfam domains common with chicken

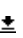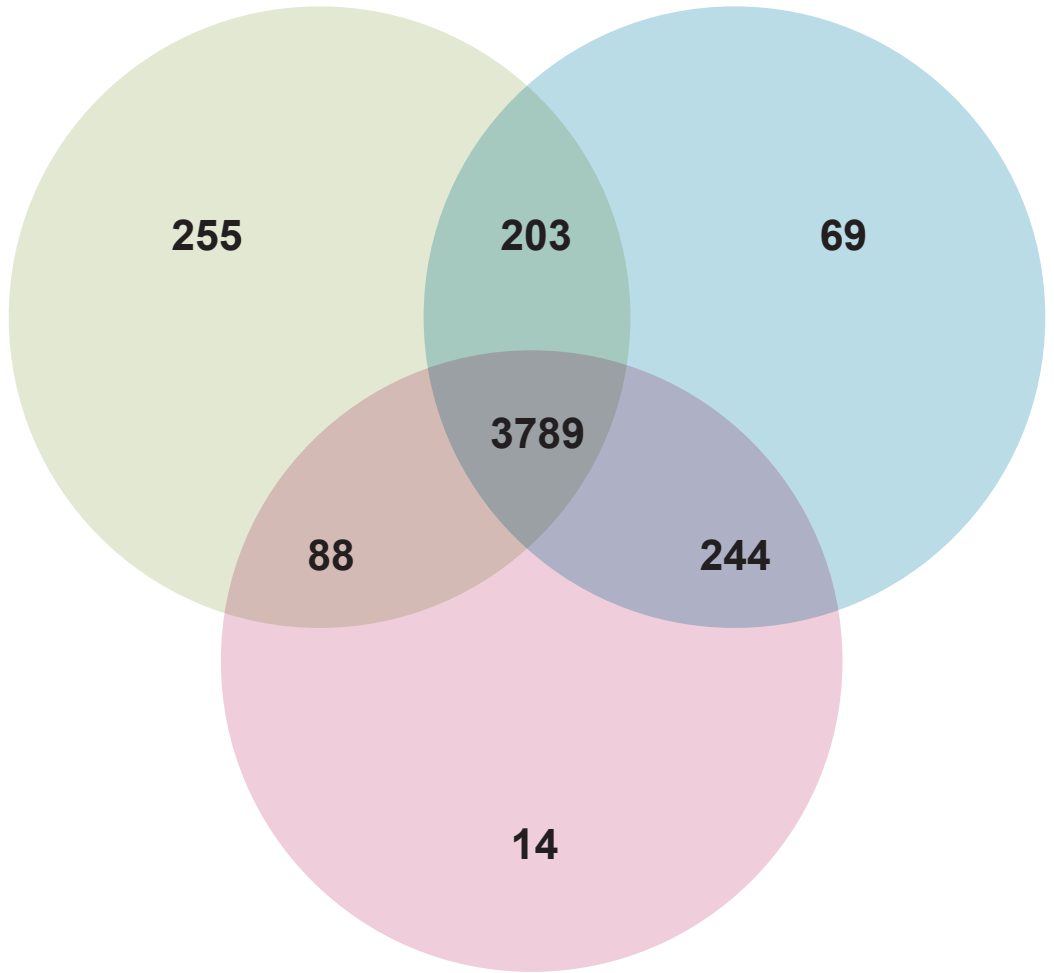

Turkey

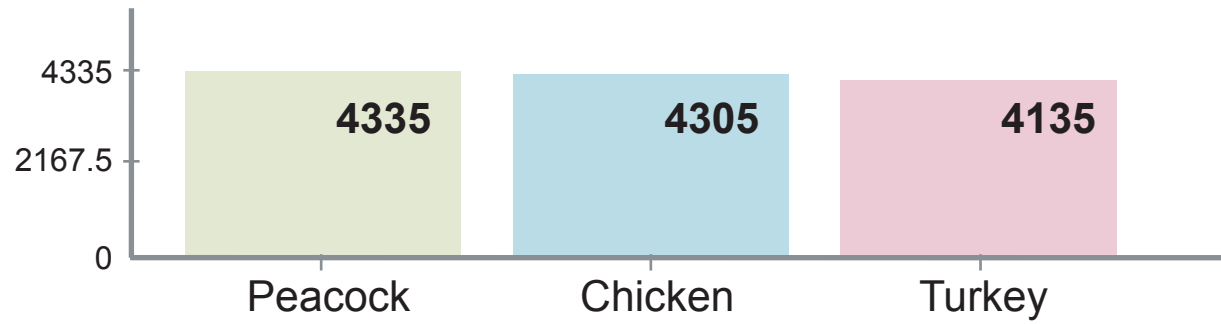

*Number of Pfam domains unique to 1 species or shared between 2 or all 3*

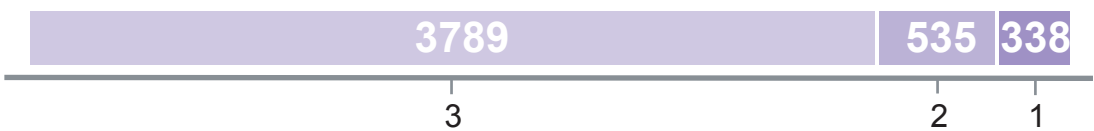

Figure 6

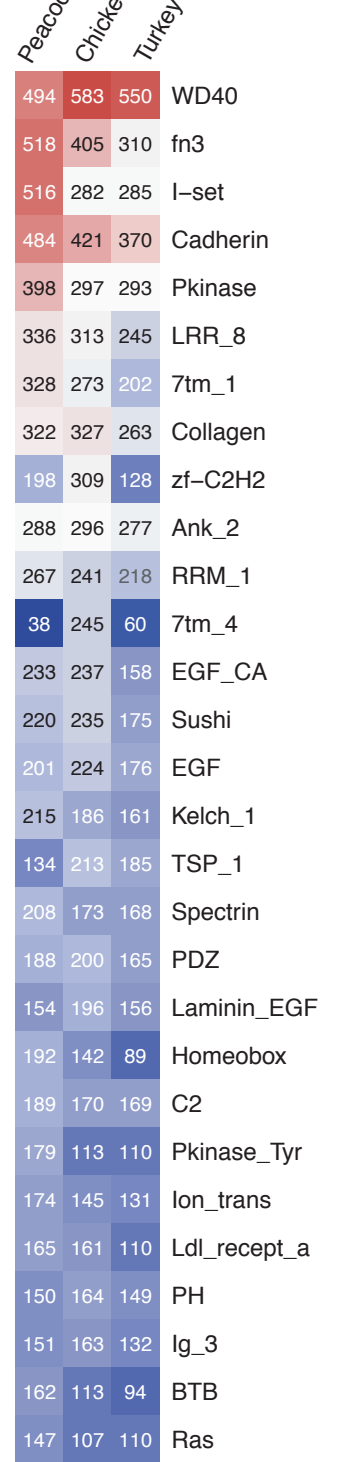

[Click here to access/download figure; Figure 6. Heatmap](#)

Figure 6

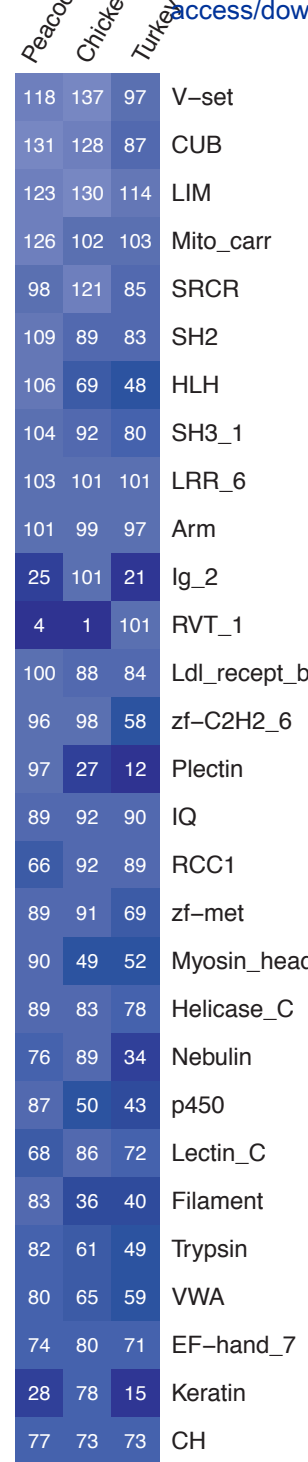

Figure 6

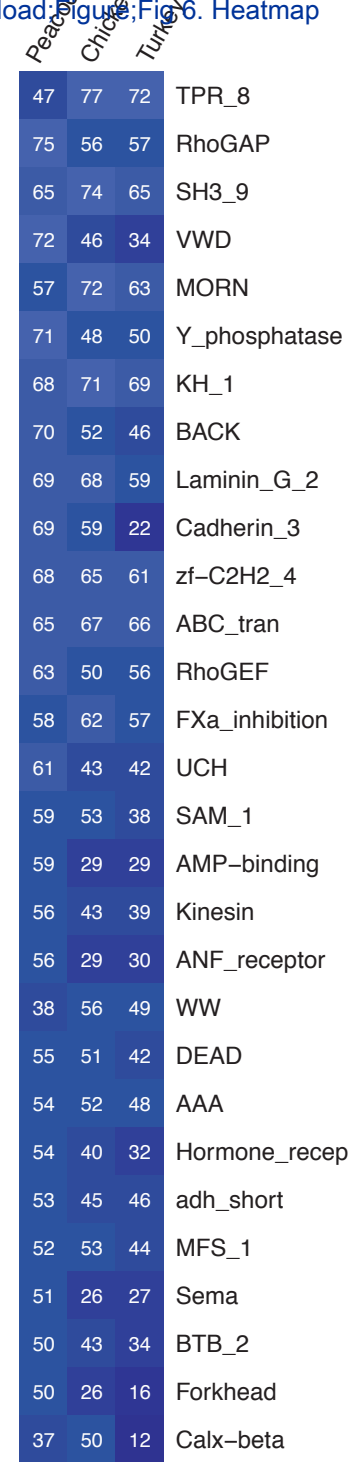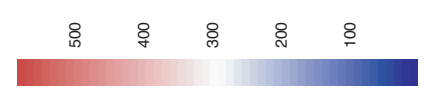

NCBI-NR

GO

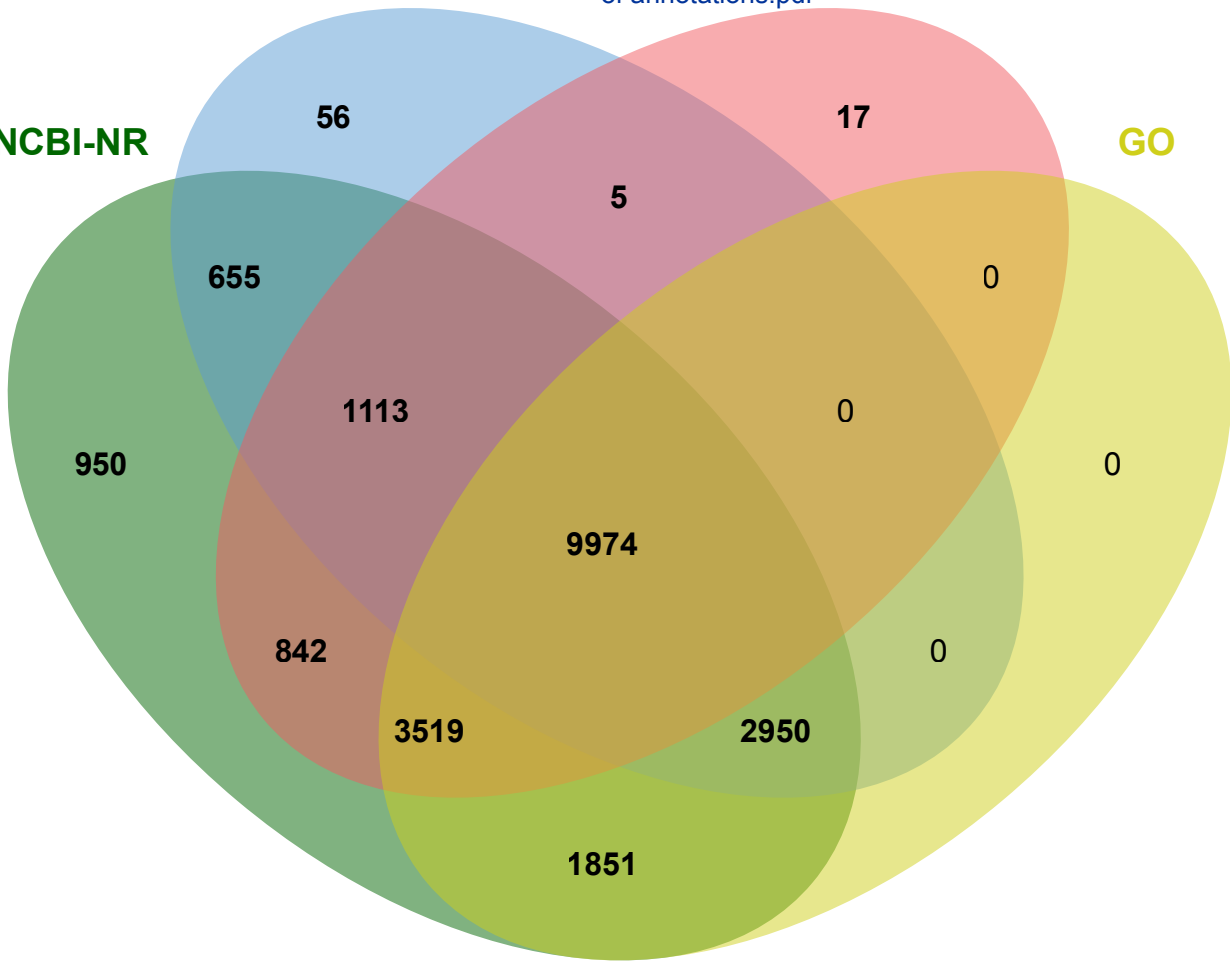

Proteins annotated from different sources

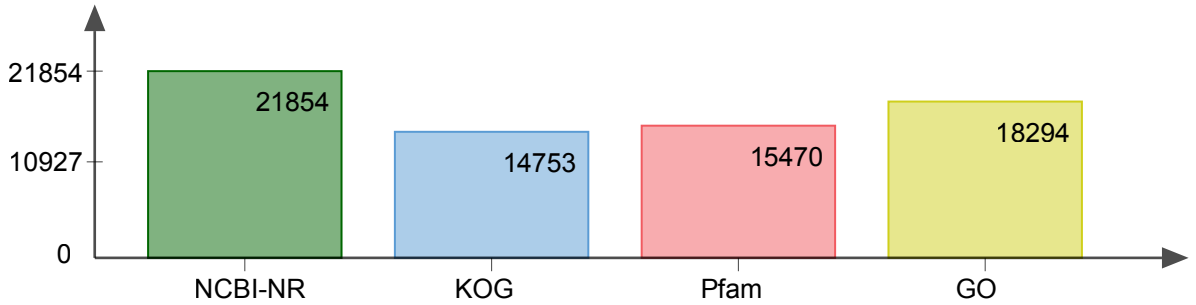

Number of common proteins: specific to 1 or shared by 2, 3, or 4 annotations

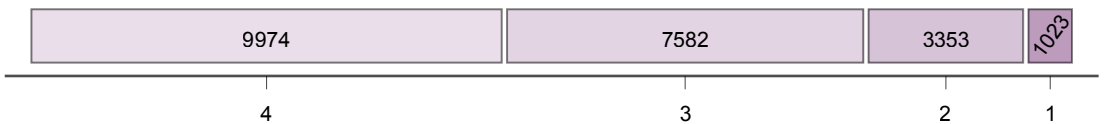

Figure 8

[Click here to access/download;Figure;Fig 8. Peacock scaffolds against Gallus circular synteny.png](#)

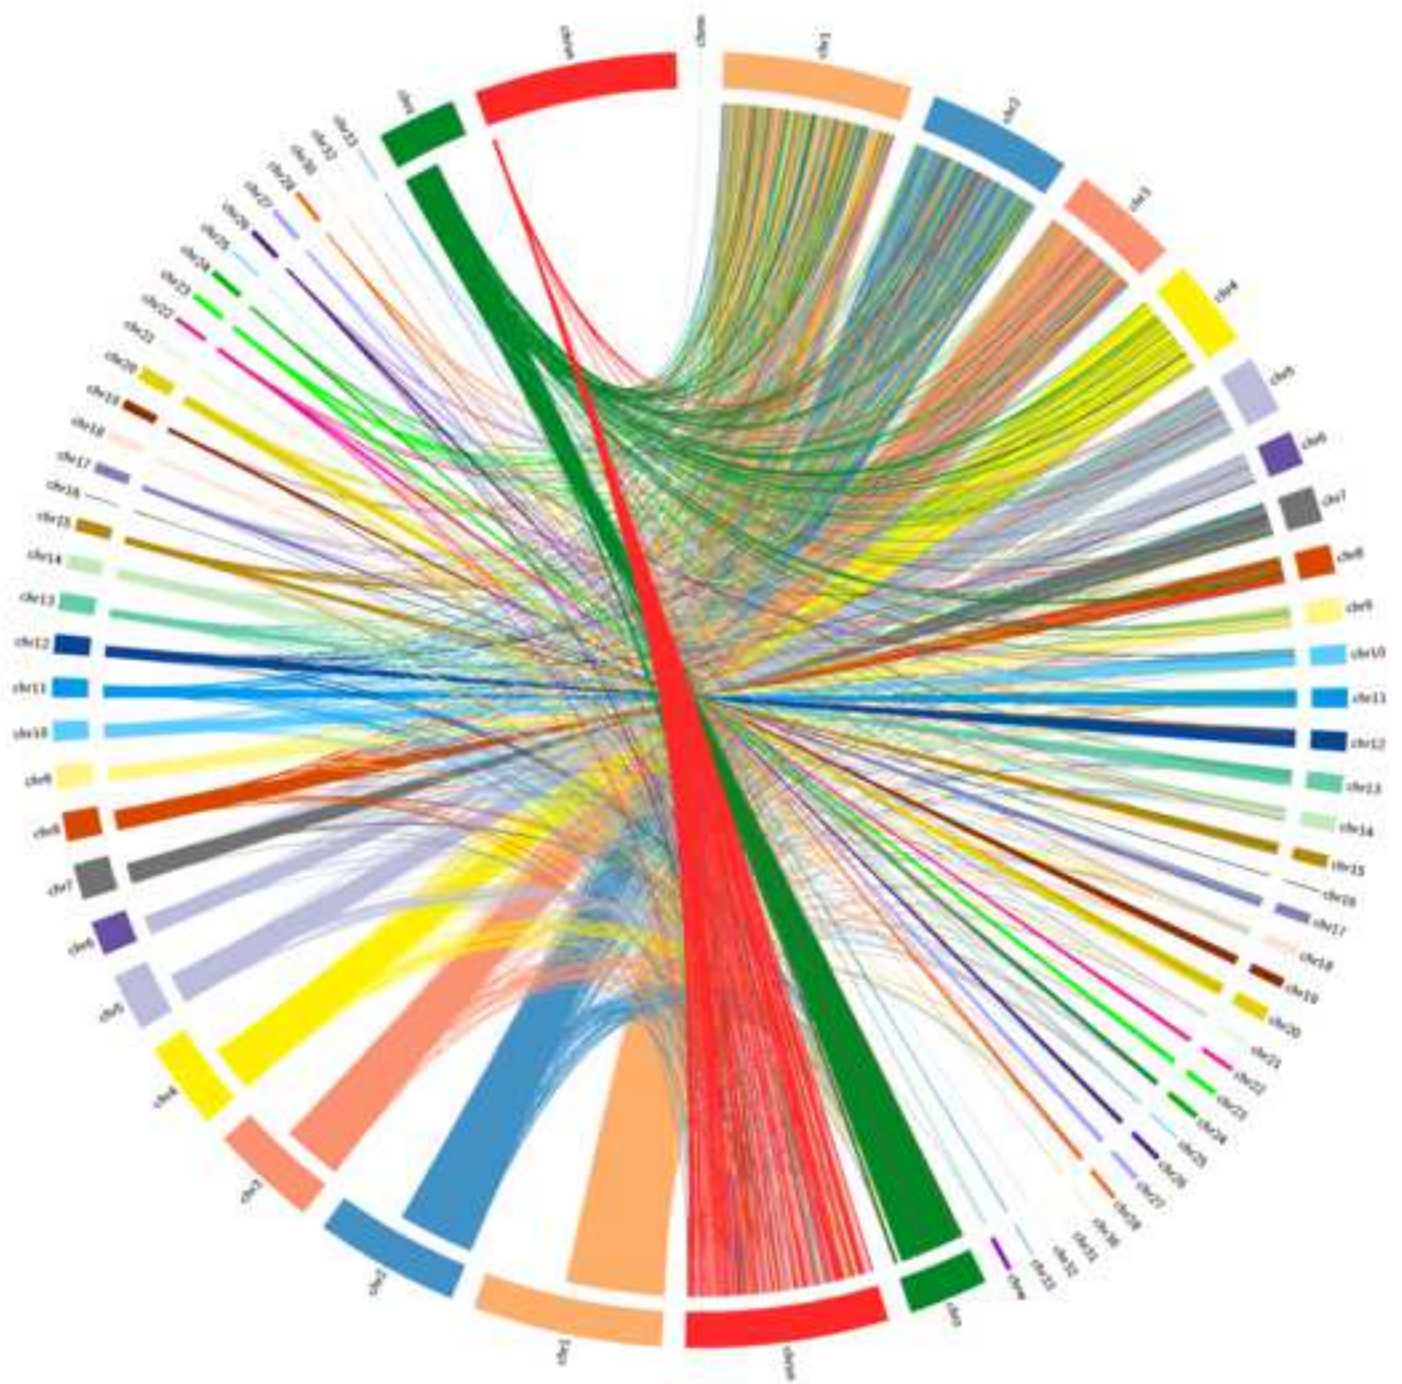



Click here to access/download

**Supplementary Material**

Supplementary\_Description of all the tables and  
figures.docx



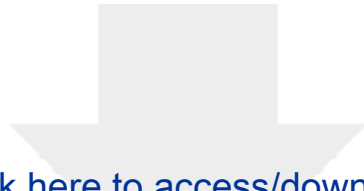

[Click here to access/download](#)

**Supplementary Material**

[Table\\_S1\\_ReadStats\\_Table\\_S2\\_TEs.xlsx](#)

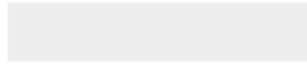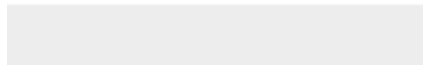



Click here to access/download  
**Supplementary Material**  
Table\_S3\_Repeats.xlsx





[Click here to access/download](#)

**Supplementary Material**

[Table\\_S4\\_Gene\\_annotations\\_of\\_peacock\\_proteins.xlsx](#)

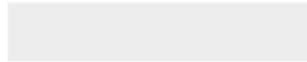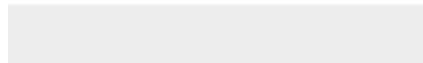



Click here to access/download  
**Supplementary Material**  
Table\_S5\_KEGG\_annotation.xlsx

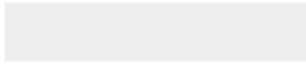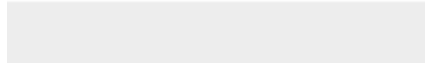



Click here to access/download  
**Supplementary Material**  
Table\_S6\_KOG\_annotation.xlsx

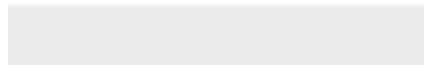

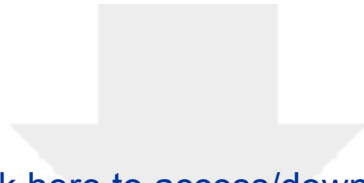

[Click here to access/download](#)

**Supplementary Material**

[Table\\_S7\\_BlastVsHumanProteins.xlsx](#)

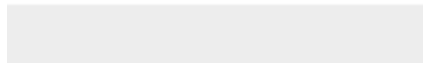

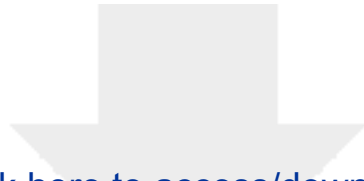

Click here to access/download  
**Supplementary Material**  
Table\_S8\_Orthologous\_proteins





Click here to access/download

**Supplementary Material**

Table\_S9\_Pfam\_Analysis.xlsx

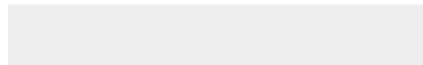





[Click here to access/download](#)

**Supplementary Material**

[Table\\_S10\\_Bird\\_Species\\_with\\_counts.xlsx](#)

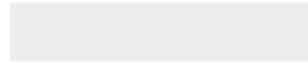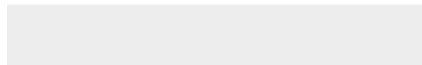



[Click here to access/download](#)

**Supplementary Material**

Fig S1. Proteins showing similarity to Pfam domains.pdf

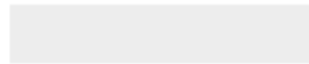



[Click here to access/download](#)

**Supplementary Material**

Fig S2. Gene Ontology of top 10 WGS.png





Click here to access/download  
**Supplementary Material**  
Fig S3.Peacock vs Human\_GO.pdf



Supplement: giz038_giga-d-18-00280_revision_2.pdf [file giz038_giga-d-18-00280_revision_2.pdf]
