# Supplementary material for: De novo assembly of the Indian blue peacock (Pavo cristatus) genome using Oxford Nanopore technology and Illumina sequencing
Source: PubMed Central journal article supplement (PMC6511069; doi:10.1093/gigascience/giz038), 2019-05-11
Supplement: giz038_giga-d-18-00280_revision_1.pdf [file giz038_giga-d-18-00280_revision_1.pdf]

## De novo genome assembly of the Indian Blue Peacock (*Pavo cristatus*), from Oxford Nanopore and Illumina sequencing

--Manuscript Draft--

|                                                    |                                                                                                                                                                                                                                                                                                                                                                                                                                                                                                                                                                                                                                                                                                                                                                                                                                                                                                                                                                                                                                                                                                                                                                                                                                                                                                                                                                                                                                                                                                                                                                                                                                                                                                                                                                                                                                                                                                                                                                                                                                                                                                                                                                                                                                                                                                                                                                                                                                                                                                                                                                                                                                                                                                                                                                                                                                                                                                                                                                                                                                                                                      |
|----------------------------------------------------|--------------------------------------------------------------------------------------------------------------------------------------------------------------------------------------------------------------------------------------------------------------------------------------------------------------------------------------------------------------------------------------------------------------------------------------------------------------------------------------------------------------------------------------------------------------------------------------------------------------------------------------------------------------------------------------------------------------------------------------------------------------------------------------------------------------------------------------------------------------------------------------------------------------------------------------------------------------------------------------------------------------------------------------------------------------------------------------------------------------------------------------------------------------------------------------------------------------------------------------------------------------------------------------------------------------------------------------------------------------------------------------------------------------------------------------------------------------------------------------------------------------------------------------------------------------------------------------------------------------------------------------------------------------------------------------------------------------------------------------------------------------------------------------------------------------------------------------------------------------------------------------------------------------------------------------------------------------------------------------------------------------------------------------------------------------------------------------------------------------------------------------------------------------------------------------------------------------------------------------------------------------------------------------------------------------------------------------------------------------------------------------------------------------------------------------------------------------------------------------------------------------------------------------------------------------------------------------------------------------------------------------------------------------------------------------------------------------------------------------------------------------------------------------------------------------------------------------------------------------------------------------------------------------------------------------------------------------------------------------------------------------------------------------------------------------------------------------|
| <b>Manuscript Number:</b>                          | GIGA-D-18-00280R1                                                                                                                                                                                                                                                                                                                                                                                                                                                                                                                                                                                                                                                                                                                                                                                                                                                                                                                                                                                                                                                                                                                                                                                                                                                                                                                                                                                                                                                                                                                                                                                                                                                                                                                                                                                                                                                                                                                                                                                                                                                                                                                                                                                                                                                                                                                                                                                                                                                                                                                                                                                                                                                                                                                                                                                                                                                                                                                                                                                                                                                                    |
| <b>Full Title:</b>                                 | De novo genome assembly of the Indian Blue Peacock ( <i>Pavo cristatus</i> ), from Oxford Nanopore and Illumina sequencing                                                                                                                                                                                                                                                                                                                                                                                                                                                                                                                                                                                                                                                                                                                                                                                                                                                                                                                                                                                                                                                                                                                                                                                                                                                                                                                                                                                                                                                                                                                                                                                                                                                                                                                                                                                                                                                                                                                                                                                                                                                                                                                                                                                                                                                                                                                                                                                                                                                                                                                                                                                                                                                                                                                                                                                                                                                                                                                                                           |
| <b>Article Type:</b>                               | Data Note                                                                                                                                                                                                                                                                                                                                                                                                                                                                                                                                                                                                                                                                                                                                                                                                                                                                                                                                                                                                                                                                                                                                                                                                                                                                                                                                                                                                                                                                                                                                                                                                                                                                                                                                                                                                                                                                                                                                                                                                                                                                                                                                                                                                                                                                                                                                                                                                                                                                                                                                                                                                                                                                                                                                                                                                                                                                                                                                                                                                                                                                            |
| <b>Funding Information:</b>                        |                                                                                                                                                                                                                                                                                                                                                                                                                                                                                                                                                                                                                                                                                                                                                                                                                                                                                                                                                                                                                                                                                                                                                                                                                                                                                                                                                                                                                                                                                                                                                                                                                                                                                                                                                                                                                                                                                                                                                                                                                                                                                                                                                                                                                                                                                                                                                                                                                                                                                                                                                                                                                                                                                                                                                                                                                                                                                                                                                                                                                                                                                      |
| <b>Abstract:</b>                                   | <p><b>Background</b><br/> <i>Pavo cristatus</i>, the Indian blue peacock are geographically found distributed in natural habitats of South Asia. The peacock has been described as one of the most elegant, majestic, and beautiful bird species. Since prehistoric times they have been described in Indian culture and has been adopted as the national bird of India. Its length varies from 92-125 centimeter (without train), weighing about 4-8 Kilograms and lives up to 20 years in the wild. This avian species have been very important in the fields of phylogenetics, developmental studies, sexual reproduction and speciation. The individuals of avian genomics have contributed immensely towards understanding the vertebrate genome evolution. Here we present the first draft genome sequence of <i>P. cristatus</i>, yet another important and popular bird species to further add values and gain insight into avian genomics.</p> <p><b>Findings</b><br/> For the first time in avian genomics, Oxford Nanopore technologies (ONT) have been used for the whole genome assembly. Along with the above sequencing technology we have sequenced different DNA insert size libraries from Illumina technology for the peacock DNA. We performed de novo genome assembly by integrating the reads from Illumina short insert, long insert, multiple mate-pair reads along with Oxford Nanopore long reads using multiple genome improvement tools. A draft of the peacock genome of about 0.915 Gigabases (Gb) with a N50 of 0.23 Megabases (Mb) was assembled. Annotations with other avian species, protein families, KEGG were performed for functional understanding by insilico approaches. Proteins were compared against Chicken, Turkey and Human to obtain evolutionary similarities and uniqueness of the <i>Pavo</i> species.</p> <p><b>Conclusions</b><br/> Our study is the first report of a high quality draft genome of <i>P. cristatus</i> using a hybrid assembly generated from Illumina sequencing reads and long reads from ONT. The long read chemistry was found to be useful in addressing challenges related to de novo assembly particularly at regions containing repetitive sequences that span longer than the read length and which cannot be resolved using short read based assembly alone. miniION based ONT offers an affordable and reliable platform to achieve this. Observation from our study showed a significant improvement in genome assembly with fewer gaps and a reliable N50 when used together with Illumina reads. Further a comparative genomics with <i>Gallus gallus</i> (Chicken) and <i>Meleagris gallopavo</i> (Turkey) have shown insights into the gene families and their conserved domains. Peacock proteins were also compared with human proteins to understand the functional components that were conserved after the speciation split. Further, the phylogentic tree on the conserved genes from the avian species showed a grouping amongst the clade of birds based on their ability to fly.</p> |
| <b>Corresponding Author:</b>                       | Subhradip Karmakar, PhD<br>All India Institute of Medical Sciences<br>New Delhi, Delhi INDIA                                                                                                                                                                                                                                                                                                                                                                                                                                                                                                                                                                                                                                                                                                                                                                                                                                                                                                                                                                                                                                                                                                                                                                                                                                                                                                                                                                                                                                                                                                                                                                                                                                                                                                                                                                                                                                                                                                                                                                                                                                                                                                                                                                                                                                                                                                                                                                                                                                                                                                                                                                                                                                                                                                                                                                                                                                                                                                                                                                                         |
| <b>Corresponding Author Secondary Information:</b> |                                                                                                                                                                                                                                                                                                                                                                                                                                                                                                                                                                                                                                                                                                                                                                                                                                                                                                                                                                                                                                                                                                                                                                                                                                                                                                                                                                                                                                                                                                                                                                                                                                                                                                                                                                                                                                                                                                                                                                                                                                                                                                                                                                                                                                                                                                                                                                                                                                                                                                                                                                                                                                                                                                                                                                                                                                                                                                                                                                                                                                                                                      |
| <b>Corresponding Author's Institution:</b>         | All India Institute of Medical Sciences                                                                                                                                                                                                                                                                                                                                                                                                                                                                                                                                                                                                                                                                                                                                                                                                                                                                                                                                                                                                                                                                                                                                                                                                                                                                                                                                                                                                                                                                                                                                                                                                                                                                                                                                                                                                                                                                                                                                                                                                                                                                                                                                                                                                                                                                                                                                                                                                                                                                                                                                                                                                                                                                                                                                                                                                                                                                                                                                                                                                                                              |
| <b>Corresponding Author's Secondary</b>            |                                                                                                                                                                                                                                                                                                                                                                                                                                                                                                                                                                                                                                                                                                                                                                                                                                                                                                                                                                                                                                                                                                                                                                                                                                                                                                                                                                                                                                                                                                                                                                                                                                                                                                                                                                                                                                                                                                                                                                                                                                                                                                                                                                                                                                                                                                                                                                                                                                                                                                                                                                                                                                                                                                                                                                                                                                                                                                                                                                                                                                                                                      |

|                                                |                                                                                                                                                                                                                                                                                                                                                                                                                                                                                                                                                                                                                                                                                                                                                                                                                                                                                                                                                                                                                                                                                                                                                                                                                                                                                                                                                                                                                                                                                                                                                                                                                                                                                                                                                                                                                                                                                                                                                                              |
|------------------------------------------------|------------------------------------------------------------------------------------------------------------------------------------------------------------------------------------------------------------------------------------------------------------------------------------------------------------------------------------------------------------------------------------------------------------------------------------------------------------------------------------------------------------------------------------------------------------------------------------------------------------------------------------------------------------------------------------------------------------------------------------------------------------------------------------------------------------------------------------------------------------------------------------------------------------------------------------------------------------------------------------------------------------------------------------------------------------------------------------------------------------------------------------------------------------------------------------------------------------------------------------------------------------------------------------------------------------------------------------------------------------------------------------------------------------------------------------------------------------------------------------------------------------------------------------------------------------------------------------------------------------------------------------------------------------------------------------------------------------------------------------------------------------------------------------------------------------------------------------------------------------------------------------------------------------------------------------------------------------------------------|
| <b>Institution:</b>                            |                                                                                                                                                                                                                                                                                                                                                                                                                                                                                                                                                                                                                                                                                                                                                                                                                                                                                                                                                                                                                                                                                                                                                                                                                                                                                                                                                                                                                                                                                                                                                                                                                                                                                                                                                                                                                                                                                                                                                                              |
| <b>First Author:</b>                           | Subhradip Karmakar, PhD                                                                                                                                                                                                                                                                                                                                                                                                                                                                                                                                                                                                                                                                                                                                                                                                                                                                                                                                                                                                                                                                                                                                                                                                                                                                                                                                                                                                                                                                                                                                                                                                                                                                                                                                                                                                                                                                                                                                                      |
| <b>First Author Secondary Information:</b>     |                                                                                                                                                                                                                                                                                                                                                                                                                                                                                                                                                                                                                                                                                                                                                                                                                                                                                                                                                                                                                                                                                                                                                                                                                                                                                                                                                                                                                                                                                                                                                                                                                                                                                                                                                                                                                                                                                                                                                                              |
| <b>Order of Authors:</b>                       | Subhradip Karmakar, PhD                                                                                                                                                                                                                                                                                                                                                                                                                                                                                                                                                                                                                                                                                                                                                                                                                                                                                                                                                                                                                                                                                                                                                                                                                                                                                                                                                                                                                                                                                                                                                                                                                                                                                                                                                                                                                                                                                                                                                      |
|                                                | Ruby Dhar                                                                                                                                                                                                                                                                                                                                                                                                                                                                                                                                                                                                                                                                                                                                                                                                                                                                                                                                                                                                                                                                                                                                                                                                                                                                                                                                                                                                                                                                                                                                                                                                                                                                                                                                                                                                                                                                                                                                                                    |
|                                                | Ashikh Seethy                                                                                                                                                                                                                                                                                                                                                                                                                                                                                                                                                                                                                                                                                                                                                                                                                                                                                                                                                                                                                                                                                                                                                                                                                                                                                                                                                                                                                                                                                                                                                                                                                                                                                                                                                                                                                                                                                                                                                                |
|                                                | Karthikeyan Pethusamy                                                                                                                                                                                                                                                                                                                                                                                                                                                                                                                                                                                                                                                                                                                                                                                                                                                                                                                                                                                                                                                                                                                                                                                                                                                                                                                                                                                                                                                                                                                                                                                                                                                                                                                                                                                                                                                                                                                                                        |
|                                                | Vishwajeet Rohil                                                                                                                                                                                                                                                                                                                                                                                                                                                                                                                                                                                                                                                                                                                                                                                                                                                                                                                                                                                                                                                                                                                                                                                                                                                                                                                                                                                                                                                                                                                                                                                                                                                                                                                                                                                                                                                                                                                                                             |
|                                                | Sunil Singh                                                                                                                                                                                                                                                                                                                                                                                                                                                                                                                                                                                                                                                                                                                                                                                                                                                                                                                                                                                                                                                                                                                                                                                                                                                                                                                                                                                                                                                                                                                                                                                                                                                                                                                                                                                                                                                                                                                                                                  |
|                                                | Kakali Purkayastha                                                                                                                                                                                                                                                                                                                                                                                                                                                                                                                                                                                                                                                                                                                                                                                                                                                                                                                                                                                                                                                                                                                                                                                                                                                                                                                                                                                                                                                                                                                                                                                                                                                                                                                                                                                                                                                                                                                                                           |
|                                                | Sandeep Goswami                                                                                                                                                                                                                                                                                                                                                                                                                                                                                                                                                                                                                                                                                                                                                                                                                                                                                                                                                                                                                                                                                                                                                                                                                                                                                                                                                                                                                                                                                                                                                                                                                                                                                                                                                                                                                                                                                                                                                              |
|                                                | Rakesh Singh                                                                                                                                                                                                                                                                                                                                                                                                                                                                                                                                                                                                                                                                                                                                                                                                                                                                                                                                                                                                                                                                                                                                                                                                                                                                                                                                                                                                                                                                                                                                                                                                                                                                                                                                                                                                                                                                                                                                                                 |
|                                                | Indrani Mukherjee                                                                                                                                                                                                                                                                                                                                                                                                                                                                                                                                                                                                                                                                                                                                                                                                                                                                                                                                                                                                                                                                                                                                                                                                                                                                                                                                                                                                                                                                                                                                                                                                                                                                                                                                                                                                                                                                                                                                                            |
|                                                | Ankita Raj                                                                                                                                                                                                                                                                                                                                                                                                                                                                                                                                                                                                                                                                                                                                                                                                                                                                                                                                                                                                                                                                                                                                                                                                                                                                                                                                                                                                                                                                                                                                                                                                                                                                                                                                                                                                                                                                                                                                                                   |
|                                                | Tryambak Srivastava                                                                                                                                                                                                                                                                                                                                                                                                                                                                                                                                                                                                                                                                                                                                                                                                                                                                                                                                                                                                                                                                                                                                                                                                                                                                                                                                                                                                                                                                                                                                                                                                                                                                                                                                                                                                                                                                                                                                                          |
|                                                | Sovon Acharya                                                                                                                                                                                                                                                                                                                                                                                                                                                                                                                                                                                                                                                                                                                                                                                                                                                                                                                                                                                                                                                                                                                                                                                                                                                                                                                                                                                                                                                                                                                                                                                                                                                                                                                                                                                                                                                                                                                                                                |
|                                                | Balaji Rajashekhar                                                                                                                                                                                                                                                                                                                                                                                                                                                                                                                                                                                                                                                                                                                                                                                                                                                                                                                                                                                                                                                                                                                                                                                                                                                                                                                                                                                                                                                                                                                                                                                                                                                                                                                                                                                                                                                                                                                                                           |
| <b>Order of Authors Secondary Information:</b> |                                                                                                                                                                                                                                                                                                                                                                                                                                                                                                                                                                                                                                                                                                                                                                                                                                                                                                                                                                                                                                                                                                                                                                                                                                                                                                                                                                                                                                                                                                                                                                                                                                                                                                                                                                                                                                                                                                                                                                              |
| <b>Response to Reviewers:</b>                  | <p>Reply to reviewer's comments (see also attached response letter).</p> <p>We thank the editors and the reviewer for reviewing our manuscript titled “ De-novo genome assembly of Indian Blue peacock (Pavo Cristatus) Oxford Nanopore and Illumina sequencing . Following reviewers comments and suggestions, we have modified the manuscript incorporating all the necessary changes. Additional figures are incorporated as per the reviewer suggestions while non relevant items are removed. File containing a point by point reply to reviewers questions was also attached. We also uploaded the raw data at NCBI SRA as requested by one of the reviewer.</p> <p>1: “of the Indian Blue Peacock”<br/>Response: The above has been changed</p> <p>3: [remove “reads”, unnecessary]<br/>Response: Reads have been removed from the title</p> <p>26-27: “are native to South Asia”<br/>Response: The authors accepted this suggestion and the same has been modified in the article.</p> <p>27-28: “The peacock has been described as one of the most elegant, majestic, and beautiful bird species.”<br/>Response: The authors thank the reviewers for suggesting this change and as per their expert suggestions, the above sentence has been included in the article.</p> <p>38,40: standardizing how you refer to Oxford Nanopore sequencing would be helpful. “Oxford Nanopore technology” vs. “long read Nanopore technologies”<br/>Response: Authors thank the reviewer for raising the concern and we have now used “Oxford Nanopore technology” in the article. Further a detail discussion of how ONT (Oxford Nanopore technology) long read chemistry was helpful to improve the genome assembly is discussed in the conclusion section. The authors want to humbly state that a hybrid approach of genome assembly using short reads along with long reads seems to improve genome quality that otherwise might not be achieved using just only one of</p> |

the type. This could be due to repetitive elements in the genome.

60: comparing peacock proteins to human seems like much less informative than comparisons to chick and turkey.

Response: When we submitted the manuscript under research category previously one of the reviewers suggested to do a comparison of peacock proteins to human. Hence we included the results of comparison against human proteins. In this present manuscript, we have included the comparisons to Chicken and Turkey.

73-84: I'm not certain that the review of avian genomics is helpful. This could be condensed to a couple of sentences with appropriate citations.

Response: Authors agree with the reviewer's suggestion. This section has been condensed and references have been included.

89-90: "The long read chemistry ..." I think this sentence is supposed to end with "repeat rich regions of the genome".

Response: Authors agree with the reviewer's suggestion. This has been modified in the manuscript as per reviewers comment.

90-91: remove, redundant with the rest of the paragraph or replace as the first sentence in the paragraph

Response: Authors thanks the reviewers for his comments and this has been corrected in the manuscript.

91-92: "Comparative genomics"

Response: This has been modified.

93-95: How will knowledge of the sex determination genes aid in selective breeding? I'm not certain this

Response: Authors agree with the reviewers suggestions and taking into duly consideration of their concern, this sentence has been modified in the updated manuscript.

97: "should improve"

Response: Authors assure the reviewer that this has been duly considered and modified in the manuscript

106: "10 seconds" (add space)

Response: Space has been added.

107: "10 minutes" (add space)

Response: Space has been added.

108: It's not clear whether the Binding Buffer was added to the collection tube with the ReliaPrep column or the tube that contained the sample mixture.

Response: Authors confirmed the working protocol from the concerned investigators and concluded that binding buffer was added to the collection tube and the entire sample preparation was carried out strictly adhering to the manufacturers protocol. The same has been incorporated in the text.

126: approximate not approx.. Abbreviation is unnecessary here.

Response: Abbreviation has been removed from the manuscript

205-206: This is a run on sentence. Should end with "Metrichor V.2.43.1" followed by a citation or URL for the software.

Response: The authors agree with the concern raised and sentence has been modified with URL included.

224-227: This section should be simplified to one sentence and combined with the prior paragraph.

Response: The paragraph is merged and modified.

229-234: Citations needed for repeatmasker tool, augustus, and Uniprot protein database. Half of this paragraph is a repeat of a prior section and could be combined there.

Response: The paragraph is merged and references have been included.

253: URL or citation needed

Response: URL included.

257: I think you mean “selected” here, not “filtered”. To my understanding, “filtered” implies exclusion.

Response: The authors agree with the reviewer that the original sentence was misleading and as per their valued suggestions necessary correction has been made in the text. We thank the reviewer for this.

269: Citation needed for Pfam

Response: Citation is included.

282-284: This should be one sentence: “Draft chromosomes were constructed by aligning the assembled draft genome against the G. gallus with the Chromosomer tool” with a citation or URL for the Chromosomer tool.

Response: The authors agree with the reviewer on this and sentences are now merged as per their recommendation. Further URL for the tool is included in the text for readers.

304-315: Citations needed for Abyss, SSPACE, PLATANUS, GAPCLOSER tools.

Response: The tools have already been cited in 214-218.

318-320: Citation needed for the previously published peacock mitogenome.

Response: Authors want to state that information /data on Peacock mitogenome has not been included in thus present manuscript .

322-326: This section needs a thorough rewrite for clarity.

Response: Authors have seriously taken the positive feedback of the reviewers comments and this section has been rewritten and one more table has been included for comparison with other bird species for better clarity. We thank the reviewers for this critical suggestion.

329-334: This data could be easier presented in a table. The very few homologous genes identified with blast hits between the peacock and parrot and mallard genomes suggest that a too stringent blast search was used.

Response: Authors agree with the reviewers comment. New figures and tables have been included in the manuscript.

334: “Thirteen species had about 100-400 annotated proteins”. This is a misstatement of these results. The authors did not annotated genes in the other bird genomes. They identified homologous genes using a very stringent requirement of similarity. Again, this data would be better presented as a table or figure, ideally as a histogram with the various bird species binned by the number of blast hits. identified between each species and the genes from the peacock genome.

Response: The authors agree on this and appreciate the reviewers concerns. This section have been rewritten and modified in this updated manuscript. The significant results are represented as pie and venn chart, histograms with complete details in tables.

337: “overrepresented” It isn’t clear what criteria or method was used for overrepresentation here.

Response: The authors want to state that this was based on the count, now this section is modified.

346-350: The interpretation of the “overrepresented” categories here isn’t clear either.

Response: This section is modified.

374: If the majority of peacock genes (15K out of 23K) clustered by themselves (ie found no homolog in any of the 49 avian proteomes used here), then probably too

|                                                                               |                                                                                                                                                                                                                                                                                                                                                                                                                                                                                                                                                                                                                                                                                                                                                                                                                                                                                                                                                                                                                                                                                                                                                                                                                                                                                                                                                                                                                                                                                                                                                                                                                                                                                                                                                                                                                                                                                                                                                                                                                                                                                                                                                                                                                                                                                                                                                                                                                                                                                                                                                                                                                                                                                                                                                                                                                                                                                                                                                                                                                                                                                                                                                                                                                                                                                                                                                                                                                                                    |
|-------------------------------------------------------------------------------|----------------------------------------------------------------------------------------------------------------------------------------------------------------------------------------------------------------------------------------------------------------------------------------------------------------------------------------------------------------------------------------------------------------------------------------------------------------------------------------------------------------------------------------------------------------------------------------------------------------------------------------------------------------------------------------------------------------------------------------------------------------------------------------------------------------------------------------------------------------------------------------------------------------------------------------------------------------------------------------------------------------------------------------------------------------------------------------------------------------------------------------------------------------------------------------------------------------------------------------------------------------------------------------------------------------------------------------------------------------------------------------------------------------------------------------------------------------------------------------------------------------------------------------------------------------------------------------------------------------------------------------------------------------------------------------------------------------------------------------------------------------------------------------------------------------------------------------------------------------------------------------------------------------------------------------------------------------------------------------------------------------------------------------------------------------------------------------------------------------------------------------------------------------------------------------------------------------------------------------------------------------------------------------------------------------------------------------------------------------------------------------------------------------------------------------------------------------------------------------------------------------------------------------------------------------------------------------------------------------------------------------------------------------------------------------------------------------------------------------------------------------------------------------------------------------------------------------------------------------------------------------------------------------------------------------------------------------------------------------------------------------------------------------------------------------------------------------------------------------------------------------------------------------------------------------------------------------------------------------------------------------------------------------------------------------------------------------------------------------------------------------------------------------------------------------------------|
|                                                                               | <p>stringent a blast search or clustering criteria were used for this analysis to be generally useful. This is supported by the fact that clustering the 750K protein sequences resulted in ~250K gene cluster, or about 3 genes per cluster. An alternate interpretation is that a large number of those 15K unique peacock genes are mis-annotations of some kind, and the reason they have no known homology is that they do not represent actual genic sequences. This is supported by the fact that a very low percentage of the annotated peacock genes were found to have Pfam domains (4335 out of 23000 or ~19% of annotated genes with a Pfam domain, see Fig. 1 in Holt and Yandell, 2011).</p> <p>Response: The authors understood the reviewers concerns and addressed the necessary changes in the reviewed manuscript. These have been modified and the new figures have been included. We used CD-Hit to cluster the proteins with 70% similarity, we have tried different similarity cut-offs and below 70% CD-hit showed errors in clustering hence we had to report results at the above mentioned cutoff. CD-Hit clusters the sequences assuming there will be 70% continuous sequence similarity. If there are mutations between the sequences like substitutions, insertions, deletions this will fall outside the cluster. The approach of this method was to work on those proteins that are present in all bird genomes and make a phylogeny on the conserved pool of orthologs. Blast similarity approaches will yield different results but we may end up with shorter orthologs and the results may be completely different. In this article we present CD-Hit based clustering approach to instead of BLAST approach to avoid false positives clustering.</p> <p>393-395: This sentence is hard to follow.<br/>Response: The authors agree with the reviewers suggestions and hence the sentence is modified.</p> <p>398: I don't think you can say that this assembly is "improved" if it is the first published assembly for this species.<br/>Response: Your statement of understanding is correct, hence the word improved have been removed from the sentence.</p> <p>410-432: The last sentence in this paragraph is missing a period. There should be some analysis of the Kit and FGF proteins that the authors point to here. Are they conserved or divergent from chicken, from guinea fowl? The fact that they are present in the genome isn't surprising or notable, since large number of proteins share homology across large taxonomic distances. The first paragraph here, which discusses sexual selection is too long, and needs to be reduced to one or two sentences to highlight the peacock's historic role in the development of the theory of sexual selection.<br/>Response: This paragraph have been removed since the literature talks about some other proteins and we have to investigate more about all these proteins and the transcriptome data will be better to reveal more about the coloration in the peacock bird.</p> <p>437: "closeness" is hard to interpret here.<br/>Response: This has been modified and made more clear for the readers. Authors want to thank reviewer for their suggestions.</p> <p>445: citation for population decline and conservation status of the Indian peafowl population.<br/>Response: The citation have been provided in the manuscript.</p> |
| <b>Additional Information:</b>                                                |                                                                                                                                                                                                                                                                                                                                                                                                                                                                                                                                                                                                                                                                                                                                                                                                                                                                                                                                                                                                                                                                                                                                                                                                                                                                                                                                                                                                                                                                                                                                                                                                                                                                                                                                                                                                                                                                                                                                                                                                                                                                                                                                                                                                                                                                                                                                                                                                                                                                                                                                                                                                                                                                                                                                                                                                                                                                                                                                                                                                                                                                                                                                                                                                                                                                                                                                                                                                                                                    |
| <b>Question</b>                                                               | <b>Response</b>                                                                                                                                                                                                                                                                                                                                                                                                                                                                                                                                                                                                                                                                                                                                                                                                                                                                                                                                                                                                                                                                                                                                                                                                                                                                                                                                                                                                                                                                                                                                                                                                                                                                                                                                                                                                                                                                                                                                                                                                                                                                                                                                                                                                                                                                                                                                                                                                                                                                                                                                                                                                                                                                                                                                                                                                                                                                                                                                                                                                                                                                                                                                                                                                                                                                                                                                                                                                                                    |
| Are you submitting this manuscript to a special series or article collection? | No                                                                                                                                                                                                                                                                                                                                                                                                                                                                                                                                                                                                                                                                                                                                                                                                                                                                                                                                                                                                                                                                                                                                                                                                                                                                                                                                                                                                                                                                                                                                                                                                                                                                                                                                                                                                                                                                                                                                                                                                                                                                                                                                                                                                                                                                                                                                                                                                                                                                                                                                                                                                                                                                                                                                                                                                                                                                                                                                                                                                                                                                                                                                                                                                                                                                                                                                                                                                                                                 |
| <b>Experimental design and statistics</b>                                     | Yes                                                                                                                                                                                                                                                                                                                                                                                                                                                                                                                                                                                                                                                                                                                                                                                                                                                                                                                                                                                                                                                                                                                                                                                                                                                                                                                                                                                                                                                                                                                                                                                                                                                                                                                                                                                                                                                                                                                                                                                                                                                                                                                                                                                                                                                                                                                                                                                                                                                                                                                                                                                                                                                                                                                                                                                                                                                                                                                                                                                                                                                                                                                                                                                                                                                                                                                                                                                                                                                |
| Full details of the experimental design and                                   |                                                                                                                                                                                                                                                                                                                                                                                                                                                                                                                                                                                                                                                                                                                                                                                                                                                                                                                                                                                                                                                                                                                                                                                                                                                                                                                                                                                                                                                                                                                                                                                                                                                                                                                                                                                                                                                                                                                                                                                                                                                                                                                                                                                                                                                                                                                                                                                                                                                                                                                                                                                                                                                                                                                                                                                                                                                                                                                                                                                                                                                                                                                                                                                                                                                                                                                                                                                                                                                    |

|                                                                                                                                                                                                                                                                                                                                                                                                                                                                                                                                                         |            |
|---------------------------------------------------------------------------------------------------------------------------------------------------------------------------------------------------------------------------------------------------------------------------------------------------------------------------------------------------------------------------------------------------------------------------------------------------------------------------------------------------------------------------------------------------------|------------|
| <p>statistical methods used should be given in the Methods section, as detailed in our <a href="#">Minimum Standards Reporting Checklist</a>. Information essential to interpreting the data presented should be made available in the figure legends.</p> <p>Have you included all the information requested in your manuscript?</p>                                                                                                                                                                                                                   |            |
| <p><b>Resources</b></p> <p>A description of all resources used, including antibodies, cell lines, animals and software tools, with enough information to allow them to be uniquely identified, should be included in the Methods section. Authors are strongly encouraged to cite <a href="#">Research Resource Identifiers</a> (RRIDs) for antibodies, model organisms and tools, where possible.</p> <p>Have you included the information requested as detailed in our <a href="#">Minimum Standards Reporting Checklist</a>?</p>                     | <p>Yes</p> |
| <p><b>Availability of data and materials</b></p> <p>All datasets and code on which the conclusions of the paper rely must be either included in your submission or deposited in <a href="#">publicly available repositories</a> (where available and ethically appropriate), referencing such data using a unique identifier in the references and in the “Availability of Data and Materials” section of your manuscript.</p> <p>Have you have met the above requirement as detailed in our <a href="#">Minimum Standards Reporting Checklist</a>?</p> | <p>Yes</p> |

[Click here to view linked References](#)

1  
2  
3  
4  
5  
6  
7  
8  
9  
10  
11  
12  
13  
14  
15  
16  
17  
18  
19  
20  
21  
22  
23  
24  
25  
26  
27  
28  
29  
30  
31  
32  
33  
34  
35  
36  
37  
38  
39  
40  
41  
42  
43  
44  
45  
46  
47  
48  
49  
50  
51  
52  
53  
54  
55  
56  
57  
58  
59  
60  
61  
62  
63  
64  
65

# ***De novo* genome assembly of the Indian Blue Peacock (*Pavo cristatus*), from Oxford Nanopore and Illumina sequencing**

**Authors:** Ruby Dhar<sup>1</sup>, Ashikh Seethy<sup>1</sup>, Karthikeyan Pethusamy<sup>1</sup>, Vishwajeet Rohil<sup>2</sup>, Sunil Singh<sup>1</sup>, Kakali Purkayastha<sup>2</sup>, Sandeep Goswami<sup>1</sup>, Rakesh Singh<sup>3</sup>, Indrani Mukherjee<sup>1</sup>, Ankita Raj<sup>1</sup>, Tryambak Srivastava<sup>1</sup>, Sovon Acharya<sup>1</sup>, Balaji Rajashekhar<sup>4,5,\*</sup> and Subhradip Karmakar<sup>1,\*</sup>

**Affiliation:** <sup>1</sup>Department of Biochemistry, AIIMS, New Delhi, India. <sup>2</sup> Vallabhbhai Patel Chest Institute (VPCI), New Delhi, India. <sup>3</sup>Kanpur Zoo, Kanpur, India. <sup>4</sup>Genotypic Technology Pvt. Ltd., Bangalore, India. and <sup>5</sup>Institute of Computer Science, University of Tartu, 50409 Tartu, Estonia

\*Corresponding Authors email: balaji@ut.ee, subhradip.k@aiims.edu,

**Running Title:** *De novo* Genome Assembly of the Peacock Bird

**Key words:** Peacock, *Pavo cristatus*, Indian National Bird, Genome Assembly, Oxford Nanopore.

## Abstract

### Background

*Pavo cristatus*, the Indian blue peacock are geographically found distributed in natural habitats of South Asia. The peacock has been described as one of the most elegant, majestic, and beautiful bird species. Since prehistoric times they have been described in Indian culture and has been adopted as the national bird of India. Its length varies from 92-125 centimeter (without train), weighing about 4-8 Kilograms and lives up to 20 years in the wild. This avian species have been very important in the fields of phylogenetics, developmental studies, sexual reproduction and speciation. The individuals of avian genomics have contributed immensely towards understanding the vertebrate genome evolution. Here we present the first draft genome sequence of *P. cristatus*, yet another important and popular bird species to further add values and gain insight into avian genomics.

### Findings

For the first time in avian genomics, Oxford Nanopore technologies (ONT) have been used for the whole genome assembly. Along with the above sequencing technology we have sequenced different DNA insert size libraries from Illumina technology for the peacock DNA. We performed *de novo* genome assembly by integrating the reads from Illumina short insert, long insert, multiple mate-pair reads along with Oxford Nanopore long reads using multiple genome improvement tools. A draft of the peacock genome of about 0.915 Gigabases (Gb) with a N50 of 0.23 Megabases (Mb) was assembled. Annotations with other avian species, protein families, KEGG were performed for functional understanding by insilico approaches. Proteins were compared against Chicken, Turkey and Human to obtain evolutionary similarities and uniqueness of the *Pavo* species.



## Conclusions

1  
2 Our study is the first report of a high quality draft genome of *P. cristatus* using a hybrid  
3  
4 assembly generated from Illumina sequencing reads and long reads from ONT. The long read  
5  
6 chemistry was found to be useful in addressing challenges related to *de novo* assembly  
7  
8 particularly at regions containing repetitive sequences that span longer than the read length  
9  
10 and which cannot be resolved using short read based assembly alone. miniION based ONT  
11  
12 offers an affordable and reliable platform to achieve this. Observation from our study showed  
13  
14 a significant improvement in genome assembly with fewer gaps and a reliable N50 when  
15  
16 used together with Illumina reads. Further a comparative genomics with *Gallus gallus*  
17  
18 (Chicken) and *Meleagris gallopavo* (Turkey) have shown insights into the gene families and  
19  
20 their conserved domains. Peacock proteins were also compared with human proteins to  
21  
22 understand the functional components that were conserved after the speciation split. Further,  
23  
24 the phylogentic tree on the conserved genes from the avian species showed a grouping  
25  
26 amongst the clade of birds based on their ability to fly.  
27  
28  
29  
30  
31  
32  
33  
34  
35  
36  
37  
38  
39  
40  
41  
42  
43  
44  
45  
46  
47  
48  
49  
50  
51  
52  
53  
54  
55  
56  
57  
58  
59  
60  
61  
62  
63  
64  
65

## Introduction

1  
2 *Pavo cristatus* commonly known as the Indian blue peacock are native to South Asian  
3  
4 countries. Due to their popularity as a beautiful bird, they have been introduced into many  
5  
6 countries. They are usually found as exhibits in park, zoos and also large number of  
7  
8 aviculturists raise and breed these species as pets (Brickle 2002; Jackson 2006). The peacock  
9  
10 bird is very popular as it symbolizes beauty, love, grace and pride (Gadagkar 2003;  
11  
12 Kushwaha et al. 2016) (Fig. 1). It has been referred in ancient literatures of India and has  
13  
14 been found closely associated with the life and culture of the peoples from South East Asia  
15  
16 and particularly India (Kadgaonkar 1993). Due to reasons above the peacock obtained the  
17  
18 status of National Bird of India in 1963.  
19  
20  
21  
22  
23  
24  
25

26  
27 The avian genomics began with the sequencing of the model organism the *Gallus gallus*  
28  
29 species (Chicken) (Hillier et al. 2004). A decade after *Gallus* sequencing, the avian genome  
30  
31 consortium assembled 48 genomes of wide variety of avian species (Zhang et al. 2014). The  
32  
33 genome sequencing of different avian species have provided a novel perspective on  
34  
35 vertebrate genome evolution and better understanding of the annotation of mammalian  
36  
37 genomic regions. The model organism *Gallus* in comparison to human genome have revealed  
38  
39 extremely high level of conservations within the orthologous regions (Bejerano et al. 2004),  
40  
41 thus promising of being a good candidate for studies of developmental biology, Immunology  
42  
43 and vertebrate genome architecture (Burt 2007; Furlong 2005).  
44  
45  
46  
47  
48  
49  
50

51 Despite the wealth of information from avian genomes sequencing projects, it is very  
52  
53 important to genome sequence other new species to add value into aves and vertebrate  
54  
55 genomics. For the first time in avian genomics, Oxford Nanopore technology (ONT or  
56  
57 Nanopore) has been used to sequence a bird genome presented in this study. The long reads  
58  
59  
60  
61  
62  
63  
64  
65

1 sequencing will help in improving genome assembly where repeat rich regions challenge the  
2 assembly of the genome. Comparative genomics with other birds will help in understanding  
3 the uniqueness of peacock genome, development of this species, sexual selection and its  
4 evolutionary relationships with other birds. The characterization of the genes and to associate  
5 these with function will provide better understanding of the peafowl species. We have  
6 unraveled some of the genomic signatures and thus have reported unique gene pools of this  
7 bird by performing comparative genomics.  
8  
9  
10  
11  
12  
13  
14  
15  
16  
17  
18

## 19 **Materials and methods**

### 20 **Sample collection and extraction of DNA**

21  
22 The whole blood of male peacock was collected from Kanpur zoo, India after obtaining the  
23 necessary ethical and institutional approval. 20µl of Proteinase K (PK) solution was taken  
24 into a 1.5ml micro centrifuge tube. 200µl of blood was added and briefly mixed. 200µl of cell  
25 lysis buffer was added to the tube, mixed by vortexing for 10 seconds; incubated at 56°C for  
26 10 minutes. ReliaPrep™ Binding Column was placed into an empty collection tube. 250µl of  
27 Binding Buffer (BBA) was added to the tube, and mixed by vortexing for 10 seconds with a  
28 vortex mixer. Contents of the tube were added to the ReliaPrep™ binding column, capped  
29 and placed in a refrigerated micro centrifuge. These were then centrifuged for 1 minute at  
30 maximum speed and flow through was discarded. Binding column was placed into a fresh  
31 collection tube. 500µl of column wash solution was added to the column and centrifuged for  
32 3 minutes at maximum speed; Flow through was again discarded. Column washing is  
33 repeated thrice. Columns were then placed in a nuclease free clean 1.5ml micro centrifuge  
34 tube. 100 µl of Nuclease-Free Water was then added to the column and centrifuged for an  
35 additional 1 minute at maximum speed. Column was discarded and elute was saved. The  
36 concentration and purity of the extracted DNA was evaluated using Nanodrop  
37  
38  
39  
40  
41  
42  
43  
44  
45  
46  
47  
48  
49  
50  
51  
52  
53  
54  
55  
56  
57  
58  
59  
60  
61  
62  
63  
64  
65

1 Spectrophotometer (Thermo Scientific) and Qubit flurometer and integrity was checked on a  
2 0.8% agarose gel. The DNA sample was aliquoted for library preparation on two different  
3  
4 platforms: Illumina HiSeq4000 and Oxford Nanopore Technologies (ONT).  
5  
6

### 7 8 9 **HiSeq Paired-End library preparation and sequencing**

10 Whole genome sequencing (WGS) libraries were prepared with Illumina-compatible  
11  
12 NEXTflex DNA sequencing kit (BIOO Scientific, Austin, Texas, U.S.A.). Approximately 1  
13  
14  $\mu$ g of genomic DNA was sheared using Covaris S2 sonicator (Covaris, Woburn,  
15  
16 Massachusetts, USA) to generate approximate fragment size distribution from 300 to 600  
17  
18 basepair (bp). The fragment size distribution was checked on Agilent 2200 Tape Station with  
19  
20 D1000 DNA screen tapes and reagents (Agilent Technologies, Palo Alto, CA, USA) and  
21  
22 subsequently purified using HighPrep magnetic beads (Magbio Genomics Inc, USA). The  
23  
24 purified fragments were end-repaired, adenylated and ligated to Illumina multiplex barcode  
25  
26 adaptors as per NEXTflex DNA sequencing kit protocol (BIOO Scientific, Austin, Texas,  
27  
28 USA).  
29  
30  
31  
32  
33  
34  
35  
36  
37  
38

39 The adapter-ligated DNA was purified with HighPrep beads (MagBio Genomics, Inc,  
40  
41 Gaithersburg, Maryland, USA) and then size selected on 2% low melting agarose gel and  
42  
43 cleaned using MinElute column (QIAGEN). The resultant fragments were amplified for 10  
44  
45 cycles of PCR using Illumina-compatible primers provided in the NEXTFlex DNA  
46  
47 sequencing kit. The final PCR product (sequencing library) was purified with HighPrep  
48  
49 beads, followed by library quality control check. The Illumina-compatible sequencing library  
50  
51 was initially quantified by Qubit fluorometer (Thermo Fisher Scientific, MA, USA) and its  
52  
53 fragment size distribution was analyzed on Agilent TapeStation. Finally, the sequencing  
54  
55 library was accurately quantified by quantitative PCR using Kapa Library Quantification Kit  
56  
57  
58  
59  
60  
61  
62  
63  
64  
65

1 (Kapa Biosystems, Wilmington, MA, USA). The qPCR-quantified library was subjected to  
2 sequencing on an Illumina sequencer for 150 bp paired-end chemistry.  
3  
4  
5  
6

7 The Illumina-compatible sequencing library for the samples has a fragment size range  
8 between 275 to 425 bp for Paired-End Short Insert (PE-SI) and 350 bp to 650bp for Paired-  
9 End Long Insert (PE-LI). As the combined adapter size is approximately 120bp, the effective  
10 user-defined insert size is 155 to 305 bp and 230 to 530 bp for PE-SI and PE-LI respectively.  
11  
12 Libraries were sequenced in Illumina HiSeq platform with 150 PE chemistry.  
13  
14  
15  
16  
17  
18  
19  
20  
21

## 22 **Mate-Pair library preparation and sequencing**

23

24 Mate Pair sequencing library was prepared with Illumina-compatible Nextera Mate Pair  
25 Sample Preparation Kit (Illumina Inc., Austin, TX, U.S.A.). Approximately 4 ug of genomic  
26 DNA was simultaneously fragmented and tagged with Mate Pair adapters in a Transposon  
27 based Tagmentation step. Tagmented DNA was then purified using AMPure XP Magnetic  
28 beads (Beckman Coulter Life Sciences, Indianapolis, IN, U.S.A.) followed by Strand  
29 Displacement to fill gaps in the Tagmented DNA. Strand displaced DNA was further purified  
30 with AMPure XP beads before size-selecting the 3-5 Kilobases (Kb), 5-7 Kb & 7-10 Kb  
31 fragments on low melting agarose gel. The fragments were circularized in an overnight blunt-  
32 end intra-molecular ligation step, which will result in circularization of DNA with the insert  
33 mate pair adapter junction. The circularized DNA was sheared using Covaris S220 sonicator  
34 (Covaris, Woburn, Massachusetts, USA) to generate approximate fragment size distribution  
35 from 300 bp to 1000 bp. The sheared DNA was purified to collect the Mate pair junction  
36 positive fragments using Dynabeads M-280 Streptavidin Magnetic beads (Thermo Fisher  
37 Scientific, Waltham, MA, U.S.A.). The purified fragments were end-repaired, adenylated and  
38 ligated to Illumina multiplex barcode adaptors as per Nextera Mate Pair Sample Preparation  
39  
40  
41  
42  
43  
44  
45  
46  
47  
48  
49  
50  
51  
52  
53  
54  
55  
56  
57  
58  
59  
60  
61  
62  
63  
64  
65

1  
2  
3  
4  
5  
6  
7  
8  
9  
10  
11  
12  
13  
14  
15  
16  
17  
18  
19  
20  
21  
22  
23  
24  
25  
26  
27  
28  
29  
30  
31  
32  
33  
34  
35  
36  
37  
38  
39  
40  
41  
42  
43  
44  
45  
46  
47  
48  
49  
50  
51  
52  
53  
54  
55  
56  
57  
58  
59  
60  
61  
62  
63  
64  
65

Kit protocol.

The adapter-ligated DNA was then amplified for 15 cycles of PCR using Illumina-compatible primers. The final PCR product (sequencing library) was purified with AMPure XP beads, followed by library quality control check. The Illumina compatible sequencing library was initially quantified by Qubit fluorometer (Thermo Fisher Scientific, MA, USA) and its fragment size distribution was analyzed on Agilent TapeStation. Finally, the sequencing library was accurately quantified by quantitative PCR using Kapa Library Quantification Kit (Kapa Biosystems, Wilmington, MA, USA). The qPCR quantified libraries were pooled in equimolar amounts to create a final multiplexed library pool for sequencing on an Illumina sequencer.

### **Oxford Nanopore MinION library preparation and sequencing**

Genomic DNA (1.5µg) was end-repaired (NEBnext ultra II end repair kit, New England Biolabs, MA, USA), cleaned up with 1x AmPure beads (Beckmann Coulter, USA). Adapter ligation were performed for 20 minutes using NEB blunt/ TA ligase (New England Biolabs, MA, USA). Library mix were cleaned up using 0.4X AmPure beads (Beckmann Coulter, USA) and eluted in 25 µl of elution buffer. Eluted Library were used for sequencing. Whole genome library were prepared by using ligation sequencing SQK-LSK108 Oxford Nanopore sequencing kit (ONT, Oxford, UK). Sequencing were performed on MinION Mk1b (ONT, Oxford, UK) using SpotON flow cell (FLO-MIN106) in a 48hr sequencing protocol on MinKNOW (1.1.20 from ONT).

### **Illumina raw data quality control and processing**

1 The Illumina reads were de-multiplexed using Illumina bcl2fastq.  
2  
3 The Illumina generated raw data for genomic libraries was quality  
4  
5 checked using FastQC (<http://www.bioinformatics.babraham.ac.uk/projects/fastqc/>)  
6  
7  
8 (Andrews, S., 2010). The paired-end Illumina reads were processed  
9  
10 for clipping the adapter and low-quality bases using customized  
11  
12 script which retains minimum 70% bases/reads with Phred score  
13  
14 ( $Q \geq 30$  in each base position) with a read length of 50 bp. The MP  
15  
16 libraries were trimmed for adapter and low-quality base trimming  
17  
18 from the 3'-end using PLATANUS internal trimmer  
19  
20  
21  
22 (<http://platanus.bio.titech.ac.jp/>) (Kajitani et al. 2014).  
23  
24  
25  
26  
27  
28  
29

### 30 **Oxford Nanopore reads base calling and processing**

31  
32 The raw data were then base-called with the cloud-based Metrichor workflow 2D Basecalling  
33  
34 plus Barcoding by Metrichor (V.2.43.1 from ONT,  
35  
36 <https://nanoporetech.com/products/metrichor>). The Oxford Nanopore reads were processed  
37  
38 using Poretools (Loman et al. 2014) for converting fast5 files to fasta format. For further  
39  
40 quantification and analysis the 2D reads or 1D high quality reads were selected for further  
41  
42 assembly.  
43  
44  
45  
46  
47  
48

### 49 ***De novo* genome assembly and genome size estimation**

50  
51 The quality checked Oxford Nanopore reads were error-corrected using Illumina PE reads.  
52  
53 For error-correction the Illumina PE-reads were aligned to the Nanopore reads by using  
54  
55 BWA aligner (Li et al. 2009). The paired-end reads were assembled using Abyss (Birol et al.  
56  
57 2009) followed by contig extension using Oxford Nanopore reads using SSPACE-LongRead  
58  
59  
60  
61  
62  
63  
64  
65

1 (Boetzer et al. 2014). Super scaffolding of the assembled scaffold was performed using  
2 SSPACE (Boetzer et al. 2010) and PLATANUS (<http://platanus.bio.titech.ac.jp/>) using the  
3  
4 Oxford Nanopore and Matepair data. Final draft genome resulted after gap closure by  
5  
6 GAPCLOSER (<http://sourceforge.net/projects/soapdenovo2/files/GapCloser/>) and  
7  
8 PLATANUS gap\_close tool (<http://platanus.bio.titech.ac.jp/>) using Illumina data. The  
9  
10 genome size was estimated using a k-mer distribution plot using JELLYFISH (Marcais et al.  
11  
12 2011). The assembly and annotation workflow has been represented in Figure 2.  
13  
14  
15  
16  
17  
18

### 19 **Identification of repetitive elements and SSR markers**

20  
21 Repetitive elements, retrotransposons and DNA transposons were identified in the draft  
22  
23 genome and was hardmasked by using reference genomic repeats of *G. gallus* using  
24  
25 Repeatmasker tool ([www.repeatmasker.org/](http://www.repeatmasker.org/)). Final assembled scaffolds were analysed for  
26  
27 Simple Sequence Repeats (SSR) identification. SSRs like the di, tri, tetra, penta and hexa-  
28  
29 nucleotide repeats in the genome were obtained using MISA (Version 1.0.0) ([http://pgrc.ipk-  
30  
31  
32  
33  
34  
35  
36  
37  
38  
39  
40  
41  
42  
43  
44  
45  
46  
47  
48  
49  
50  
51  
52  
53  
54  
55  
56  
57  
58  
59  
60  
61  
62  
63  
64  
65](http://pgrc.ipk-gatersleben.de/misa/)

### 66 **Annotation of the draft genome**

67  
68 Gene models were predicted on a hard masked draft genome and further genes were  
69  
70 predicted using AUGUSTUS (<http://augustus.gobics.de/>) with *G. gallus* (red junglefowl the  
71  
72 chicken) as a reference model. The predicted proteins were annotated by using BLASTP  
73  
74 (Altschul et al. 1990) against the NCBI NR (non-redundant) database with default parameters  
75  
76 at E-value cutoff of 1E-5.  
77  
78  
79  
80  
81  
82  
83  
84  
85  
86  
87  
88  
89  
90  
91  
92  
93  
94  
95  
96  
97  
98  
99  
100

101  
102 The predicted proteins were searched against the KEGG-KAAS server  
103  
104 (<http://www.genome.jp/tools/kaas/>) for pathway analysis (Moriya et al. 2007). *G. gallus*, *M.  
105  
106 gallopavo* (turkey), *Taeniopygia guttata* (zebra finch), *Falco peregrinus* (peregrine falcon)  
107  
108  
109  
110  
111  
112  
113  
114  
115  
116  
117  
118  
119  
120  
121  
122  
123  
124  
125  
126  
127  
128  
129  
130  
131  
132  
133  
134  
135  
136  
137  
138  
139  
140  
141  
142  
143  
144  
145  
146  
147  
148  
149  
150  
151  
152  
153  
154  
155  
156  
157  
158  
159  
160  
161  
162  
163  
164  
165



1 were used as reference organism for pathway identification. The EuKaryotic Orthologous  
2 Groups (KOGs) (<https://genome.jgi.doe.gov/portal/help/kogbrowser.jsf>) were predicted using  
3  
4  
5 homology based approach.  
6

### 7 8 9 **Prediction of protein domains**

10  
11 Predicted proteins from Peacock, Chicken and Turkey with sequence length greater than 100  
12  
13 amino acids were considered for protein domain analysis. All the protein sequences from  
14  
15 each organism were searched against Pfam-A database (<http://pfam.sanger.ac.uk/>) using  
16  
17 Pfam scan (<https://www.ebi.ac.uk/seqdb/confluence/display/THD/PfamScan>) for protein  
18  
19 domain identification.  
20  
21  
22  
23  
24  
25

### 26 **Identification of avian protein families**

27  
28 A total of 748,544 protein sequences from 49 avian species (including peacock proteins from  
29  
30 this study) and others were downloaded from <http://avian.genomics.cn/en/jsp/database.shtml>.  
31  
32 Sequences greater than 100 amino acids from all the avian genomes were selected and  
33  
34 concatenated to a single fasta file. These sequences were clustered using CD-HIT (Fu et al.  
35  
36 2012) with 70% alignment coverage for the shorter sequence with a length difference cutoff  
37  
38 of 0.7. The single copy ortholog gene family present across all organisms and genes unique to  
39  
40 peacock were filtered and annotated.  
41  
42  
43  
44  
45  
46  
47  
48

### 49 **Phylogenetic tree construction**

50  
51 Gene clusters containing proteins in all the avian species were selected for phylogenetic  
52  
53 analysis. These protein sequences from each species were concatenated and were aligned by  
54  
55 multiple sequence alignment tool Clustalw (<http://www.clustal.org/clustal2>). The poorly  
56  
57 aligned positions and divergent regions were removed using Gblock tool  
58  
59  
60  
61  
62  
63  
64  
65

1 (http://molevol.cmima.csic.es/castresana/Gblocks.html). The fasta format sequences were  
2 converted to phylip format using Phylip tool  
3  
4 (http://evolution.genetics.washington.edu/phylip/getme-new1.html). Phylogenetic trees were  
5 constructed using IQ-TREE version 1.5.6 (www.iqtree.org). The parameters used for  
6 phylogenetic tree construction were ultrafast bootstrap (UFBoot, using the -bb option of 1000  
7 replicates), and a standard substitution model (-st AA -m TEST) and alrt 1000 -nt AUTO  
8 was given for tree generation. The generated trees from IQ-TREE tool were visualized using  
9 Figtree (http://tree.bio.ed.ac.uk/software/figtree/) and the Brach-support values were recorded  
10 from the output “.treefile”. The trees were modified for better visualization under Trees  
11 section increasing order nodes were applied.  
12  
13  
14  
15  
16  
17  
18  
19  
20  
21  
22  
23  
24  
25

## 26 **Genome conservation analysis**

27  
28 Draft chromosome visualizations were constructed by aligning the assembled peacock  
29 genome against the *G. gallus* with the Chromosomer tool  
30 (https://github.com/gtamazian/chromosomer). The reordered assembled genome was aligned  
31 against the Chicken genome using LAST aligner (http://last.cbrc.jp/) with NEAR (finding  
32 short-and-strong (near-identical) similarities.) parameter allowing for substitution and gap  
33 frequencies leading to the identification of orthologs. These query-mapped regions were  
34 filtered with a greater than 1% of the maximum length for visualization using Circos  
35 (http://circos.ca/).  
36  
37  
38  
39  
40  
41  
42  
43  
44  
45  
46  
47  
48  
49  
50

## 51 **Results**

### 52 **Genome sequencing assessment**

53  
54 A total of five libraries from Illumina HiSeq technology of 150 bp paired-end were  
55 generated. The short-insert reads of 489,114,747 accounted to genome coverage of 146.7X  
56  
57  
58  
59  
60  
61  
62  
63  
64  
65

1 and long-insert reads of 302,884,819 sequences was about 90.9X coverage with a total  
2 coverage of 236X. Sequencing of three mate-pairs of 3-5Kb, 5-7Kb of and 7-10Kb yielded  
3  
4 72,915,033, 47,440,144 and 36,464,628 reads respectively with an approximate coverage of  
5  
6 21.9X, 14.2X and 10.9X respectively, with a grand total of 156 million mate-pair reads of  
7  
8 47X coverage. Oxford Nanopore technology was used to generate 366,323 long reads having  
9  
10 of 2,398,560,283 bp with coverage of 2.3X. The complete genome sequencing was generated  
11  
12 to a depth of ~287X from both Illumina and Oxford Nanopore platforms. The coverage was  
13  
14 based on assuming the peacock genome size of about 1 Gb (Table S1).  
15  
16  
17  
18  
19  
20  
21

## 22 **Genome assembly**

23  
24 The first assembly was performed on Illumina reads with *Abyss de novo* assembler that  
25  
26 resulted in ~932 Mb (mega base) of genome with an N50 of 1639 bp. The extension of the  
27  
28 contigs were performed with Oxford Nanopore reads which generated scaffolds with N50 of  
29  
30 14,748 bp. Super scaffolding of the assembled scaffold was performed using SSPACE and  
31  
32 PLATANUS with MP libraries that generated ~916 Mb genome with the N50 value of  
33  
34 168,140bp. The final gap closer was executed using GAPCLOSER program with MP and  
35  
36 PE-LI libraries which generated a draft genome of 1.02 GB (giga base). The draft genome  
37  
38 assembly of *Pavo cristatus* consists of 179,346bp scaffolds, with a N50 of 189,886bp with 37  
39  
40 scaffolds having sequence length  $\geq 1$ Mbp. Contigs above 5000 bp have covered a genome of  
41  
42 ~0.915 Mb with N50 0.23 Mb. In the assembled genome there were ~0.4% of non-ATGC  
43  
44 characters (Table 1).  
45  
46  
47  
48  
49  
50  
51  
52  
53

## 54 **Repetitive genome elements and SSR markers**

55  
56 A total of 75,315,566 bp (7.33%) of the peacock genome was estimated to consist of repeat  
57  
58 sequences (Table S2a). In the genome about 56,511,635 bp (5.5%) of retrotransposons (class  
59  
60  
61  
62  
63  
64  
65

1 I) were identified as the NON-LTR elements (LINEs (4.7%), SINEs (0.08%)) and LTR  
2 elements (0.72%). Then the DNA transposons (class II) of 7,277,390 bp (0.71%) and  
3 unclassified elements of about 467,719 (0.05%) were identified (Table S2A). Other avian  
4 birds have shown the median percentages of LINEs, SINEs, LTR, DNA, Unknown and total  
5 masked bases were of 3.94, 0.11, 1.31, 0.22, 0.85 and 6.93 respectively (Table S2B).  
6  
7  
8  
9  
10  
11  
12  
13

14 A total of 399,493 SSRs were obtained from the peacock genome assembly. The largest  
15 fraction of SSRs identified were mono-nucleotide (60.04%), followed by tetra-nucleotide  
16 (26%), di-nucleotide (8.51%), tri-nucleotide (4.31%), penta-nucleotide (1.03%) and finally  
17 hexa-nucleotide (0.13%). Among the SSRs identified, A (49.2%) and T (44.9%) accounted  
18 for 94.1% of the mono-nucleotide repeats. AT (23.8%), TA (16.5%), TG (13.7%), AC  
19 (10.6%) and CA (10.32%) accounted for 75% of the di-nucleotide repeats. while TTG  
20 (9.9%), AAT (9.6%), AAC (9.4%), TTA (7.1%), ATT (4.5%), TAA (3.5%), CAA (3.1%)  
21 and GGA (2.69%) accounted for 49.7% of the tri-nucleotide repeats (Table S3).  
22  
23  
24  
25  
26  
27  
28  
29  
30  
31  
32  
33  
34  
35  
36

### 37 **Gene prediction and annotation**

38  
39 A total of 23,153 proteins were predicted from the assembled draft genome using  
40 AUGUSTUS. Among them 21,854 (94.4%) predicted proteins showed homology to other  
41 sequences from the NCBI NR database (Fig. 3). The top three organisms where the peacock  
42 proteins showed homology belonged to the *G. gallus* with 11,398 proteins, *M. gallopavo* with  
43 4059 proteins, *Amazona aestiva* (Blue-fronted Amazon parrot) with 1352 proteins and *Anas*  
44 *platyrhynchos* (Mallard) with 849 proteins. The detail annotations of all the proteins are  
45 available in Table S4.  
46  
47  
48  
49  
50  
51  
52  
53  
54  
55  
56  
57  
58

59 Significant gene Ontology (GO) descriptions were assigned for 18,294 (79%) proteins.  
60  
61  
62  
63  
64  
65

1 Among them, 14,489 proteins have Molecular Function; 11,678 have Biological Process and  
2 13,735 proteins have Cellular Component as functional categories (Table S4 and Fig. S3).  
3  
4 About 4091 (17.7%) of unique proteins were found to have pathway information from the  
5 KEGG database (Table S5). Proteins searched against the KOG annotations showed a total of  
6  
7 20,937 proteins having annotations (Table S6). Against the human proteins the peacock  
8  
9 proteins showed expansions in ontologies for cell morphogenesis, neuronal projection and  
10  
11 development and GTPases (Table S7 and Fig. S4).  
12  
13  
14  
15  
16  
17  
18

### 19 **Analysis of avian protein families**

20  
21 A total of 748,544 protein sequences from 49 avian species have 653,497 protein sequences  
22  
23 of length above 100 amino acids (Table S8A). A total of 114,121 gene clusters were  
24  
25 generated of which 68 gene clusters had single copy orthologs present in all the 49 avian  
26  
27 species (Table S8B and Table S8C). With the stringent cutoff 13,860 clusters unique to  
28  
29 peacock species were observed (Table S8D).  
30  
31  
32  
33  
34  
35

### 36 **Phylogenetic analysis**

37  
38 The phylogenetic analysis of 48 avian species along with peacock genome showed clustering  
39  
40 of the *P. cristatus* species in a clade of *G. gallus* (chicken), *M. gallopavo* (turkey), *A.*  
41  
42 *platyrhynchos* (mallard the duck), *Tinamus guttatus* (white-throated tinamou) and *Struthio*  
43  
44 *camelus* (ostrich). This is the largest clade with six species of having a bootstrap support of a  
45  
46 100. In the aforementioned clade leaving the mallard species all belong to flightless or low  
47  
48 flying birds. The bootstrap support between *P. cristatus* and *G. gallus* were 96, followed by  
49  
50 *M. gallopavo* of 100 bootstrap support (Fig. 4).  
51  
52  
53  
54  
55  
56  
57

### 58 **Comparison with other species**

1 Predicted proteins from peacock, chicken and turkey when searched for the conserved Pfam  
2 protein domains showed about 81% of the domains that were common among these three  
3 species (Fig. 5, Table S9). In comparison with the total unique Pfam domains from all the  
4 three species, 94%, 98.4% and 99.7% Pfam domains were present in peacock, chicken and  
5 turkey respectively. There were 255, 69 and 14 Pfam domains unique in the aforementioned  
6 species respectively (Table S9H).

7  
8  
9  
10  
11  
12  
13  
14 There are 78% (15470), 85% (12794) and 85% (11745) of the peacock, chicken and turkey  
15 proteins respectively found to contain Pfam domains (Table S9). The assembled peacock  
16 genome when reordered for pseudo chromosomes generation against the masked 1.21GB  
17 chicken genome (Warren et al. 2016) showed a 597MB reordered peacock genome (Fig. 6).

## 26 **Conclusions**

27  
28  
29 Using a combination of short reads of different insert sizes as well as mate pair reads  
30 generated from Illumina technology along with long reads from Oxford Nanopore, we  
31 obtained a draft genome of the Indian Blue Peacock. In comparison with other avian genomes  
32 (Zhang et al. 2014), the current 290X sequencing depth obtained from our study is one of the  
33 highest. The draft genome assembly generated have an N50 of 0.23MB. The inclusion of  
34 Oxford Nanopore reads for scaffolding followed by subsequent gap-closing using Illumina  
35 sequencing data led to a 26.2% reduction in the number of scaffolds and about 50.7% and  
36 115% increase in the scaffold and contig N50 statistics, respectively. On the contrary, the  
37 assembly contained less than 0.4% of unknown nucleotides, which is very low for a draft  
38 assembly. Thus with 2.3X coverage of Oxford Nanopore reads, a significant improvement in  
39 the assembly was observed. Thus we have shown how the low-cost third generation  
40 sequencing data from Oxford Nanopore was used for the first time in avian genomics for de  
41 novo assembly and have yielded substantiality improved the final draft genome. This will  
42  
43  
44  
45  
46  
47  
48  
49  
50  
51  
52  
53  
54  
55  
56  
57  
58  
59  
60  
61  
62  
63  
64  
65

1 further benefit in understanding the organisms in the structurally complex regions having  
2 repeat elements and isoforms in the genome (Goodwin et al. 2016).  
3

4 Comparisons of the genome features of Peacock with other species and databases have shown  
5 about 95% homology (Fig. 7). With an enhancement in the sequencing coverage from long  
6 reads based platforms with transcriptomic sequencing aided by scaffolding and/or gap closure  
7 tools, further improvement in the assembly can be achieved. These improvements in the  
8 genome with help to understand the role of these unique proteins and other features that truly  
9 makes this bird unique. The genome sequence also gives insights on its genetic lineage and  
10 evolution with relation to other avian members. The estimated median divergence time of *P.*  
11 *cristatus* from *G. gallus* is of about 35 million years ago (MYA) while between *G. gallus* and  
12 and *M. gallopavo* is about 37 MYA (<http://www.timetree.org/>). The huge gap is due to non-  
13 availability of genome sequences from other avians, which can be reduced by sequencing  
14 other avian species. Several hypothesis and evolutionary theories with respect to sexual  
15 selection, population genetics, developmental biology or immunology can be better  
16 understood with the help of other avian genome sequencing. Among the vertebrates, it has  
17 been observed that the variations in TEs among avians are very low (Sotero-Caio et al. 2017)  
18 (Table S8). The genome complexities of a species are influenced by the Transposable  
19 elements (TE) that are believed to play a crucial role (Kapsuta et al. 2017). In this peacock  
20 genome assembly inclusion of Oxford Nanopore sequencing have significantly improved the  
21 assembly thus helping in resolving the repetitive regions in genome quality and assembly.  
22 Homology searches have shown several important gene family expansions such as Kinases,  
23 Zn finger proteins, GTPases and others (Fig. 8). Their roles in biology, development and  
24 evolution of the peacocks need to be further explored.  
25  
26  
27  
28  
29  
30  
31  
32  
33  
34  
35  
36  
37  
38  
39  
40  
41  
42  
43  
44  
45  
46  
47  
48  
49  
50  
51  
52  
53  
54  
55  
56  
57  
58  
59  
60  
61  
62  
63  
64  
65

1  
2  
3  
4  
5  
6  
7  
8  
9  
10  
11  
12  
13  
14  
15  
16  
17  
18  
19  
20  
21  
22  
23  
24  
25  
26  
27  
28  
29  
30  
31  
32  
33  
34  
35  
36  
37  
38  
39  
40  
41  
42  
43  
44  
45  
46  
47  
48  
49  
50  
51  
52  
53  
54  
55  
56  
57  
58  
59  
60  
61  
62  
63  
64  
65

One of the most important task will be to characterize the genes involved in the coloration of the tail feather plumage in *P. cristatus* (Roulin et al. 2013). The peacock feathers have played a significant role in the mating and sexual selection. Peacock seems to defy the Darwinian laws of natural selection. These concern were raised by no other than Darwin himself. Hence, he proposed the theory of the sexual selection where the female can choose for a male with a certain phenotypic feature such as brilliant color or a long tail (Burgess 2001). Peacock's brilliantly colored long tail feathers seems to evolve at the cost of finding its female partner thereby contributing its beneficial genes, even at the cost of making itself vulnerable to predators. A female peafowl in turn tends to choose the mate with the largest and decorated plumage, which indirectly reflects its healthiness and capacity to wade off potential competitors. Thus understanding the formation of beautiful feathers from the genomic context will help in resolving several evolutionary theories on sexual selection that have been discussed on this species.

The genome information can be valued and explored by avian enthusiasts to further understand about the peacock Though not critically endangered yet, in India, peafowl population is surely at a declining trend in the wild due to massive deforestation and habitat loss (Ramesh et al. 2009). These are further compounded by increased poaching for meat and feathers of peacock bird. Our genome sequencing initiative of *Pavo cristatus* is not just only from a conservational viewpoint, but also to preserve a heritage associated with this bird that runs through centuries and that bears a strong attachment to the national psyche.

#### **Availability of supporting data**



1 Supplementary data contains, read statistics, annotation, repeats identification, orthology  
2 analysis, assembly and annotation. Figures, Gene ontology and annotations. Additional data  
3 will be available from <https://biit.cs.ut.ee/supplementary/peacock/>  
4  
5  
6  
7  
8

### 9 **Raw Data and genome assembly in SRA**

10 Raw reads (Illumina and Oxford Nanopore) are available in the Sequence Read Archive  
11 (SRA), and the Whole Genome Shotgun project has been deposited at GenBank under SRA  
12 Submission ID: SUB3108024, Bioproject: PRJNA413288 and Biosamples  
13 SUB3108018/SAMN07739105 : SKPea2016\_SI, SUB3108017/SAMN07739104 :  
14 SKPea2016\_LI, SUB3107930/SAMN07739101 : FPL\_3\_5KB,  
15 SUB3108015/SAMN07739102 : FPL\_5\_7KB, SUB3108016/SAMN07739103 :  
16 FPL\_7\_10KB and SUB3108020/SAMN07739107 : FPL\_Nano. The *de novo* genome  
17 assembly can be accessed under SUB4504869/ SAMN07739105.  
18  
19  
20  
21  
22  
23  
24  
25  
26  
27  
28  
29  
30  
31  
32  
33

### 34 **Competing interests**

35 The author(s) declare that they have no competing interests.  
36  
37  
38  
39  
40

### 41 **Authors contributions**

42 RD, AS, KP performed wet lab experiments; RD designed work plan, experiments and  
43 logistics; SS, VR, KP SG IM and AR assisted with the work; RS provided samples from bird;  
44 BR, SK performed data analysis and interpretation; BR, SK drafted the manuscript and SK  
45 overseen the whole project.  
46  
47  
48  
49  
50  
51  
52  
53  
54  
55  
56  
57

### 58 **Acknowledgements**

1 Department of Biochemistry, AIIMS, New Delhi for providing space and infrastructure to  
2 carry on the work. RD for providing partial funding. Raja, Sudha and their team Deepti,  
3  
4 Shalini, Nagu, Abhi and Manish from Genotypic Technology Pvt. Ltd for providing  
5  
6 sequencing services. BR acknowledges IUT 34-4.  
7  
8  
9  
10  
11  
12  
13  
14  
15  
16  
17  
18  
19  
20  
21  
22  
23  
24  
25  
26  
27  
28  
29  
30  
31  
32  
33  
34  
35  
36  
37  
38  
39  
40  
41  
42  
43  
44  
45  
46  
47  
48  
49  
50  
51  
52  
53  
54  
55  
56  
57  
58  
59  
60  
61  
62  
63  
64  
65

## Tables

Table 1. *De novo* assembly statistics of the peacock genome.

| Description      | Contigs     | Nanopore Scaffold | Super Scaffolds | GapClosed     | >1000 Kb    | >5000 Kb    |
|------------------|-------------|-------------------|-----------------|---------------|-------------|-------------|
| Contigs          | 685,241     | 281,272           | 179,346         | 179,332       | 34,178      | 15,025      |
| Maximum Length   | 49,159      | 251,510           | 2,390,121       | 2,488,982     | 2,488,982   | 2,488,982   |
| Minimum Length   | 300         | 5                 | 265             | 265           | 1000        | 5000        |
| Average Length   | 1360        | 3250              | 5111            | 5729          | -           | -           |
| Total Length     | 932,162,464 | 914,363,908       | 916,720,956     | 1,027,510,962 | 954,449,349 | 915,342,012 |
| Length >= 100 bp | 685,241     | 281,271           | 179,346         | 179,332       | 34,178      | 15,025      |
| Length >= 200 bp | 685,241     | 281,271           | 179,346         | 179,332       | 34,178      | 15,025      |
| Length >= 500 bp | 616,120     | 186,433           | 93,727          | 93,718        | 34,178      | 15,025      |
| Length >= 1 Kbp  | 363,428     | 104,479           | 34,168          | 34,178        | 34,178      | 15,025      |
| Length >= 10 Kbp | 1591        | 24,748            | 9249            | 10,310        | 10,310      | 10,310      |
| Length >= 1 Mbp  | 0           | 0                 | 27              | 37            | 37          | 37          |
| Non-ATGC #       | 350,325     | 42,696,911        | 49,169,831      | 4,043,129     | 4,040,790   | 3,986,487   |
| Non-ATGC %       | 0.038       | 4.67              | 5.36            | 0.393         | 0.423       | 0.436       |
| N50 value        | 1639        | 14,748            | 168,140         | 190,304       | 218,023     | 232,312     |

## Figure legend

**Figure 1.** The beautiful and charismatic photo of Indian blue peacock (*Pavo cristatus*) bird.

**Figure 2.** Detailed workflow for *de novo* whole genome assembly and annotation.

**Figure 3.** Peacock proteins showing homology.. Pie chart showing significant similarity scores of peacock proteins against the NR database.

**Figure 4.** Phylogenetic tree generated from homologous proteins from 49 different avian species. Birds on dotted line are low flying or non-flying birds. Solid line represents flying birds.

**Figure 5.** Venn diagram showing common and unique Protein family domains (Pfam) between Peacock, Chicken and Turkey proteins.

**Figure 6.** Circular image of the assembled peacock genome aligned against the *G. gallus* genome using Chromosomer tool. Draft chromosomes were generated by similarity between scaffolds that were arranged on the reference chicken genome. Circos was used for visualization. The right side of the image represents the reference chicken genome and left side of the image represents the Peacock genome.

**Figure 7.** Venn diagram showing peacock proteins showing significant homology to NR database, KOG, Pfam and GO ontologies.

**Figure 8.** Heatmap showing protein family (Pfam) distributed in peacock, chicken or turkey species where each row contains maximum of 50 Pfam domains.

## References:

1. Brickle, N. 2002. Habitat use, predicted distribution and conservation of green peafowl (*Pavo muticus*) in Dak Lak Province, Vietnam. *Biological Conservation*, 105: 189-197.
2. Jackson, C. 2006. *Peacock*. London: Reaktion Books Ltd.
3. Gadagkar, R., 2003. Is the peacock merely beautiful or also honest?. *Current Science*, 85(7), pp.1012-1020.
4. Kushwaha, S., and Kumar, A. 2016. A Review on Indian Peafowl (*Pavo cristatus*) Linnaeus, 1758. *Journal of Wildlife and Research*, 4, 42-59.
5. Kadgaonkar, Shivendra B. 1993. The peacock in ancient Indian art and literature. *Bulletin of the Deccan College Research Institute*, vol. 53, pp. 95–115. JSTOR, [www.jstor.org/stable/42936434](http://www.jstor.org/stable/42936434).
6. Hillier LW, Miller W, Birney E, Warren W, International Chicken Genome Sequencing Consortium et al. 2004 Sequence and comparative analysis of the chicken genome provide unique perspectives on vertebrate evolution. *Nature* 432:695–716
7. Zhang, G., Jarvis, E. D., and Gilbert, M. T. P. 2014. A flock of genomes. *Science* 346, 1308–1309.
8. Bejerano, G., Pheasant, M., Makunin, I., Stephen, S., Kent, W.J., Mattick, J.S. and Haussler, D., 2004. Ultraconserved elements in the human genome. *Science*, 304(5675), pp.1321-1325.
9. Furlong, R.F., 2005. Insights into vertebrate evolution from the chicken genome sequence. *Genome biology*, 6(2), p.207.
10. Kajitani, R., Toshimoto, K., Noguchi, H., Toyoda, A., Ogura, Y., Okuno, M., Yabana, M., Harada, M., Nagayasu, E., Maruyama, H. and Kohara, Y., 2014. Efficient de novo assembly of highly heterozygous genomes from whole-genome shotgun short reads. *Genome research*, 24(8), pp.1384-1395.

11. Loman, N. J. and Quinlan, A. R. 2014. Poretools: a toolkit for analyzing nanopore sequence data. *Bioinformatics*, 30(23), 3399-3401.
12. Li H. and Durbin R. 2009. Fast and accurate short read alignment with Burrows-Wheeler Transform. *Bioinformatics*, 25:1754-60.
13. Birol, I., Jackman, S.D., Nielsen, C.B., Qian, J.Q., Varhol, R., Stazyk, G., Morin, R.D., Zhao, Y., Hirst, M., Schein, J.E. and Horsman, D.E., 2009. De novo transcriptome assembly with ABySS. *Bioinformatics*, 25(21), pp.2872-2877.
14. Boetzer, Marten, and Walter Pirovano. 2014. SSPACE-LongRead: scaffolding bacterial draft genomes using long read sequence information. *BMC bioinformatics* 15.1: 211
15. Boetzer, M., Henkel, C.V., Jansen, H.J., Butler, D. and Pirovano, W., 2010. Scaffolding pre-assembled contigs using SSPACE. *Bioinformatics*, 27(4), pp.578-579.
16. Marcais, G and Kingsford, C. 2011. A fast, lock-free approach for efficient parallel counting of occurrences of k-mers. *Bioinformatics* 27(6): 764-770.
17. Altschul, S.F., Gish, W., Miller, W., Myers, E.W. and Lipman, D.J., 1990. Basic local alignment search tool. *Journal of molecular biology*, 215(3), pp.403-410.
18. Moriya, Y., Itoh, M., Okuda, S., Yoshizawa, A.C. and Kanehisa, M., 2007. KAAS: an automatic genome annotation and pathway reconstruction server. *Nucleic acids research*, 35(suppl\_2), pp.W182-W185.
19. Fu, L., Niu, B., Zhu, Z., Wu, S. and Li, W., 2012. CD-HIT: accelerated for clustering the next-generation sequencing data. *Bioinformatics*, 28(23), pp.3150-3152.
20. Warren, W.C., Hillier, L.W., Tomlinson, C., Minx, P., Kremitzki, M., Graves, T., Markovic, C., Bouk, N., Pruitt, K.D., Thibaud-Nissen, F. and Schneider, V., 2016. A new chicken genome assembly provides insight into avian genome structure. *G3: Genes, Genomes, Genetics*, pp.g3-116.

- 1  
2 21. Zhang, G., Li, C., Li, Q., Li, B., Larkin, D.M., Lee, C., Storz, J.F., Antunes, A.,  
3 Greenwold, M.J., Meredith, R.W. and Ödeen, A., 2014. Comparative genomics reveals  
4 insights into avian genome evolution and adaptation. *Science*, 346(6215), pp.1311-  
5 1320.  
6  
7  
8  
9
- 10  
11 22. Goodwin, S., McPherson, J.D. and McCombie, W.R., 2016. Coming of age: ten years  
12 of next-generation sequencing technologies. *Nature Reviews Genetics*, 17(6), p.333.  
13  
14  
15
- 16  
17 23. Sotero-Caio, C.G., Platt, R.N., Suh, A. and Ray, D.A., 2017. Evolution and diversity of  
18 transposable elements in vertebrate genomes. *Genome biology and evolution*, 9(1),  
19 pp.161-177.  
20  
21  
22
- 23  
24 24. Kapusta, A. and Suh, A., 2017. Evolution of bird genomes—a transposon's- eye  
25 view. *Annals of the New York Academy of Sciences*, 1389(1), pp.164-185.  
26  
27  
28
- 29  
30 25. Roulin, A. and Ducrest, A.L., 2013, June. Genetics of colouration in birds. In *Seminars*  
31 *in cell & developmental biology* (Vol. 24, No. 6-7, pp. 594-608). Academic Press.  
32  
33
- 34  
35 26. Ramesh, K. and McGowan, P., 2009. On the current status of Indian peafowl *Pavo*  
36 *cristatus* (Aves: Galliformes: Phasianidae): keeping the common species common.  
37 *Journal of Threatened Taxa*, 1(2), pp.106-108.  
38  
39  
40  
41  
42  
43  
44  
45  
46  
47  
48  
49  
50  
51  
52  
53  
54  
55  
56  
57  
58  
59  
60  
61  
62  
63  
64  
65

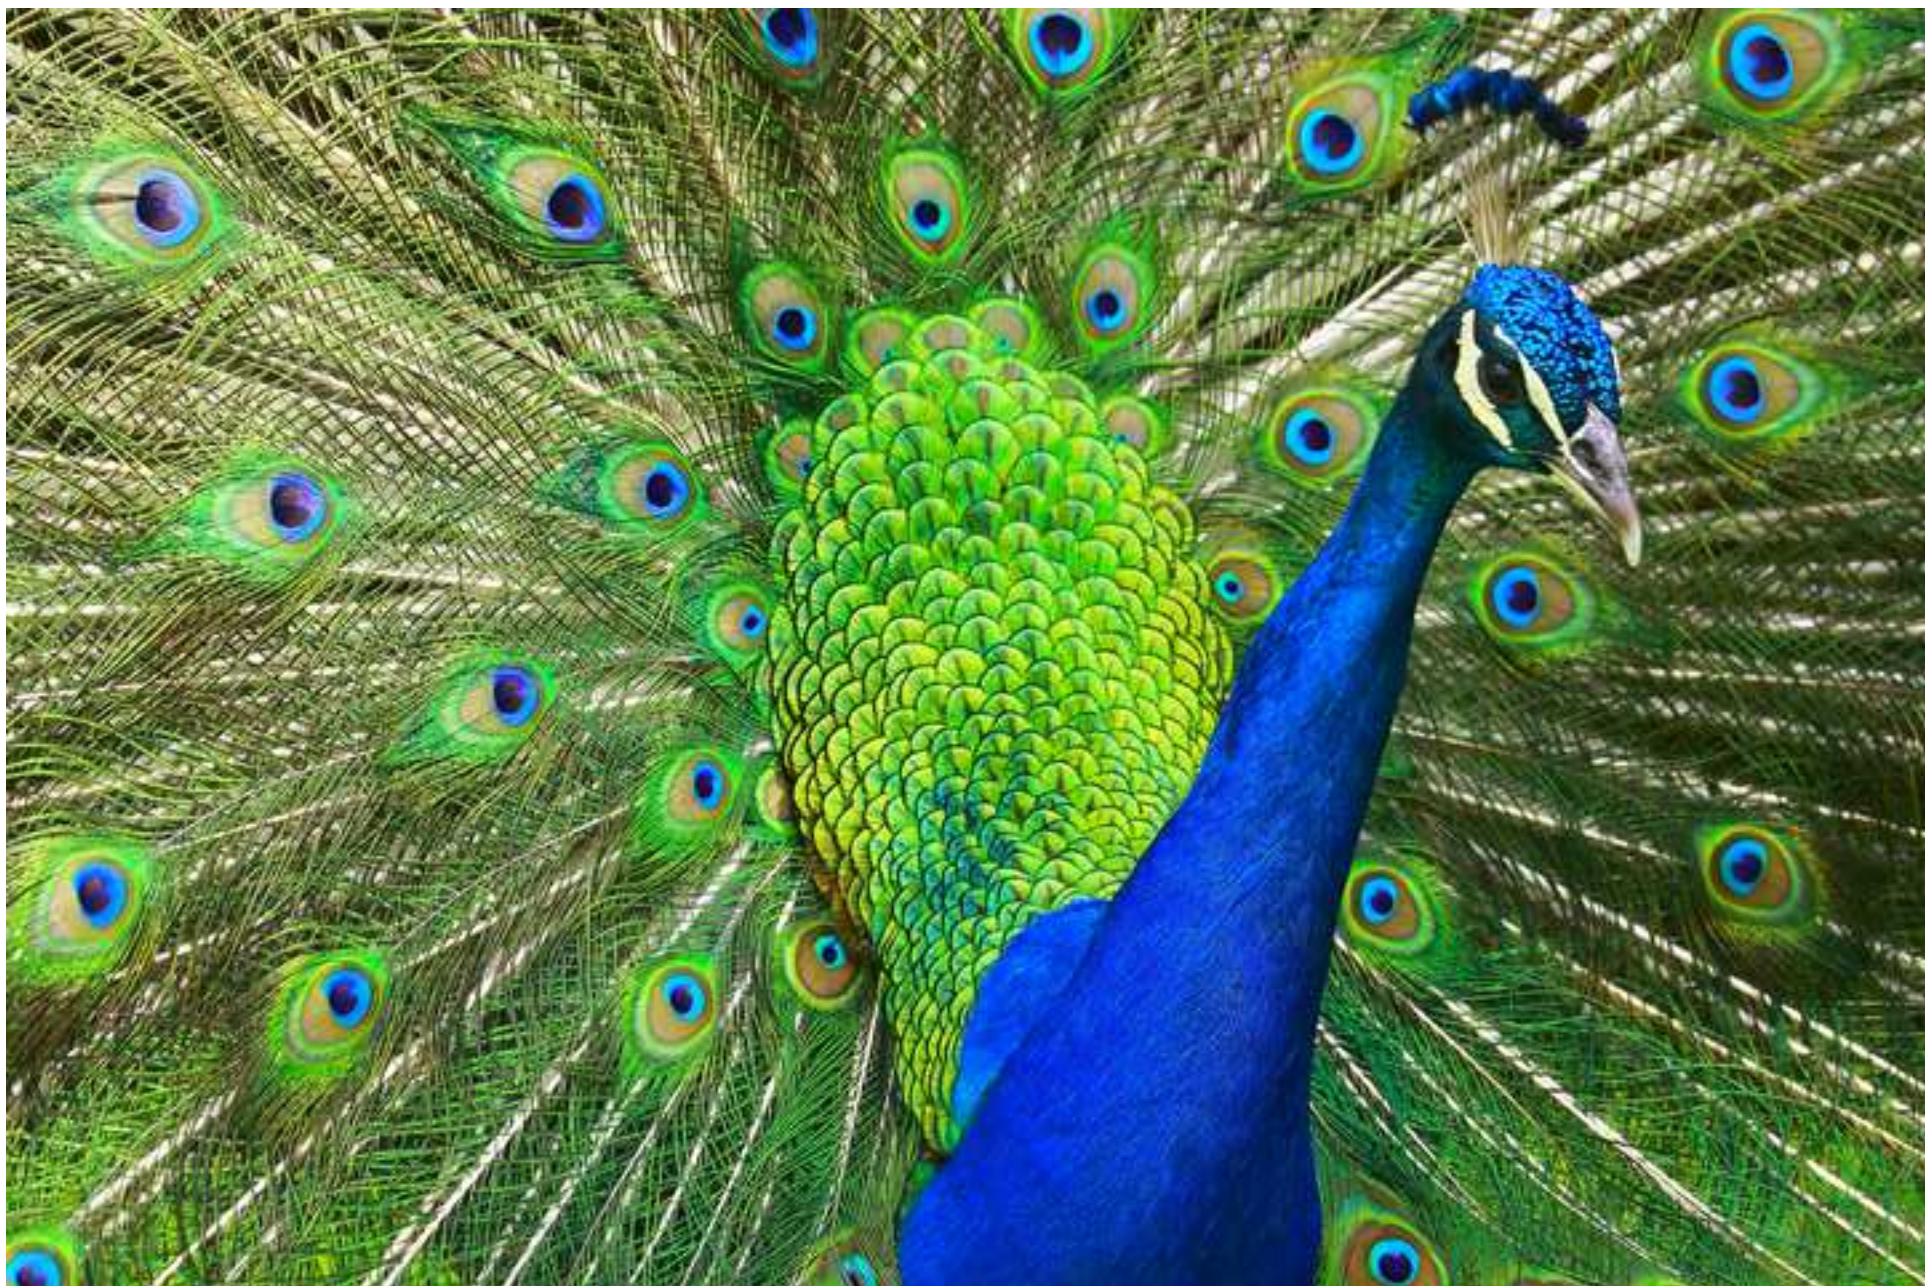



Figure 2

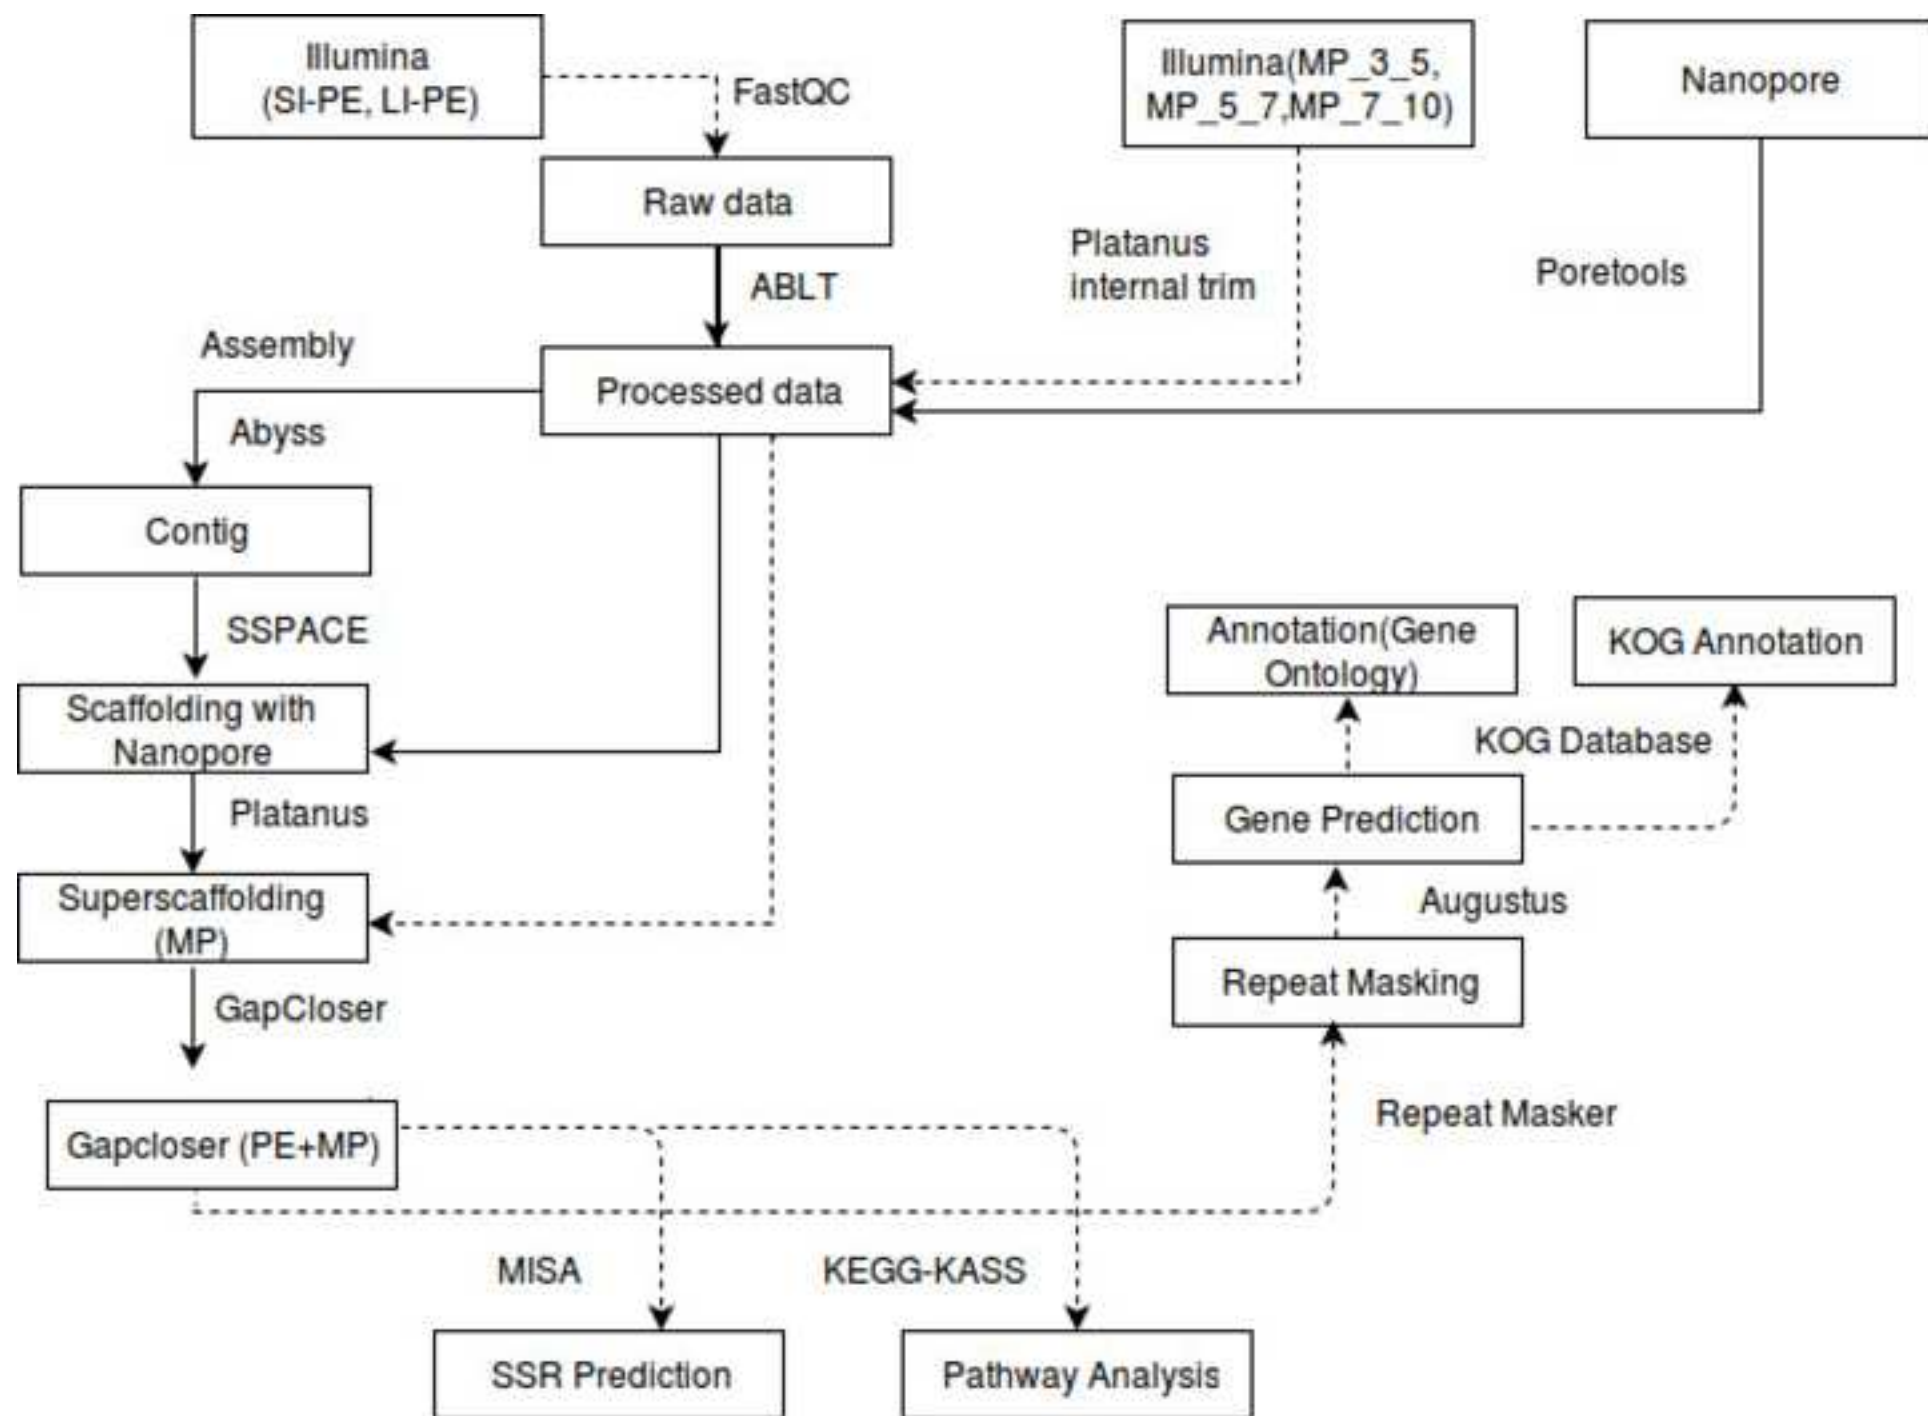

Figure 3

[Click here to access/download;Figure;Fig 3; Similarity scores against the Uniprot database.pdf](#)

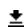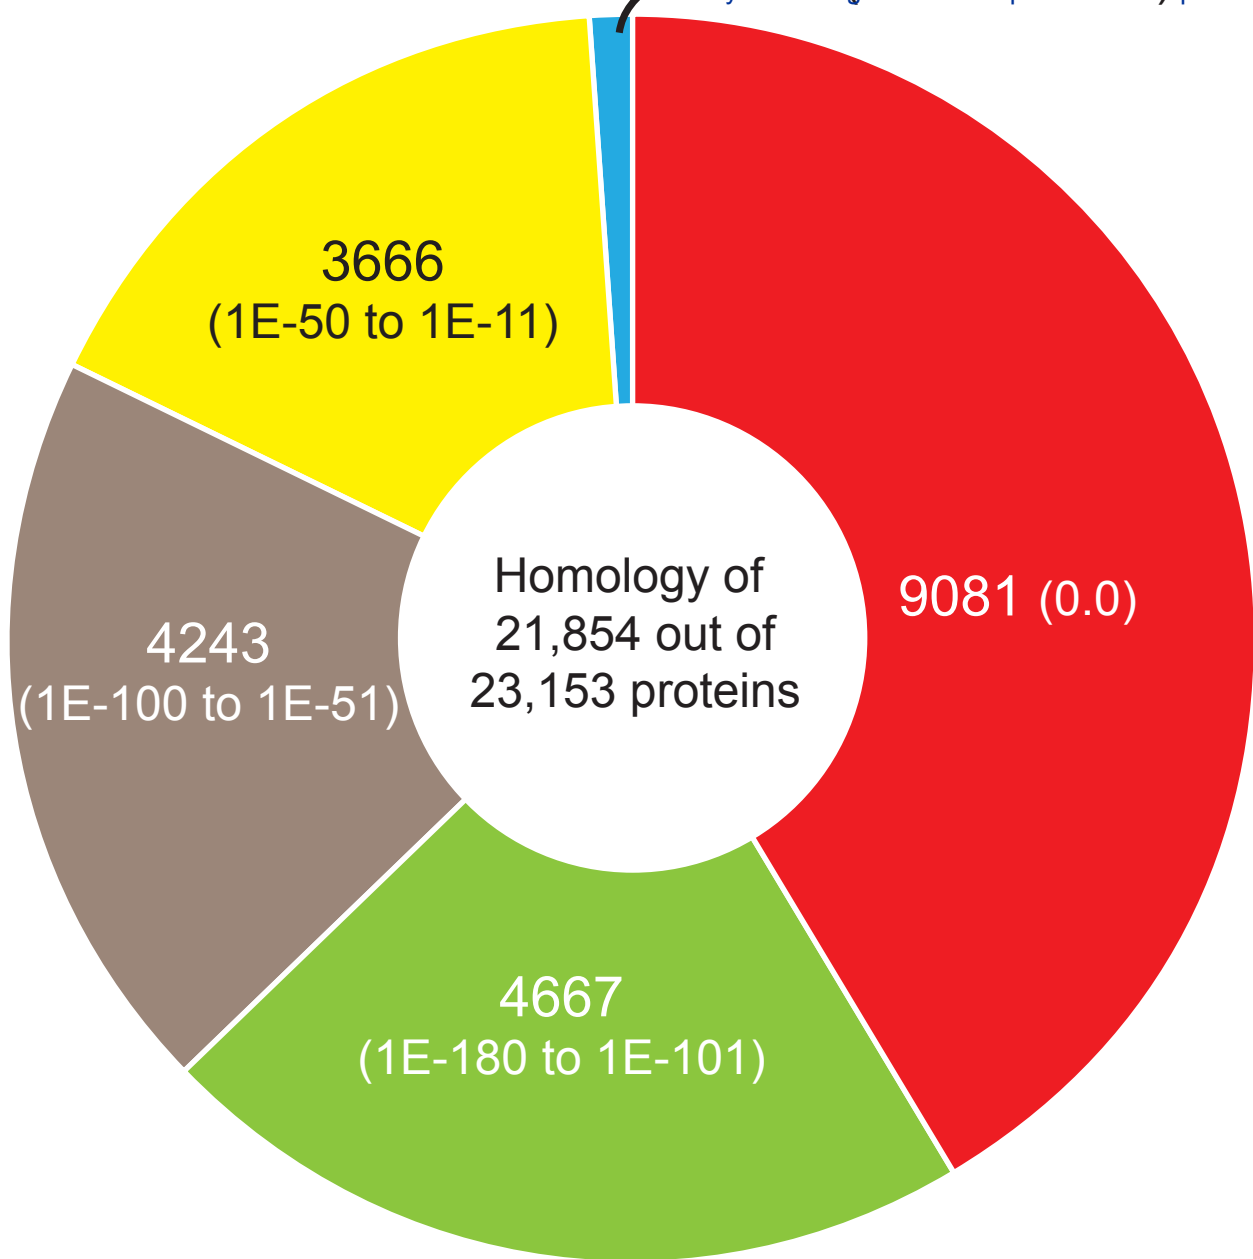



Figure 5

[Click here to access/download;Figure;Fig 5.](#) Unique Pfam domains common with chicken

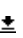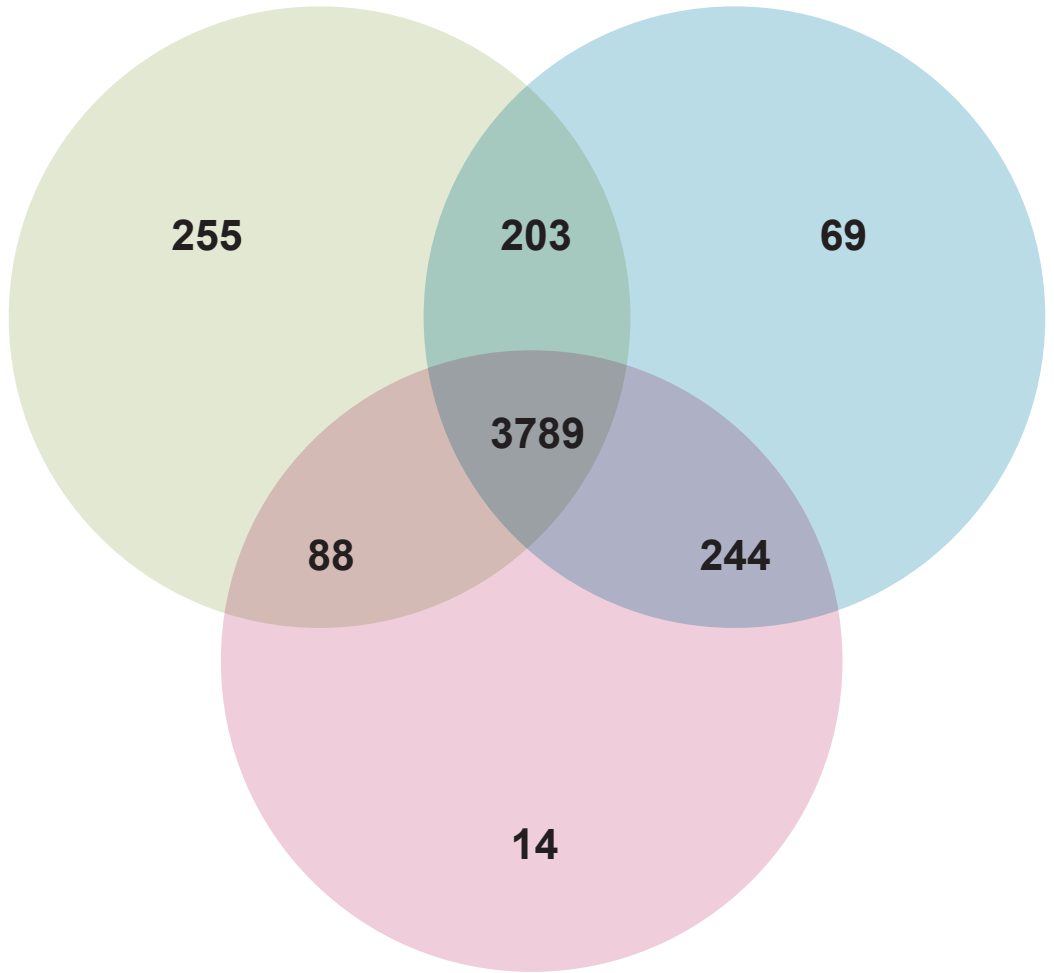

Turkey

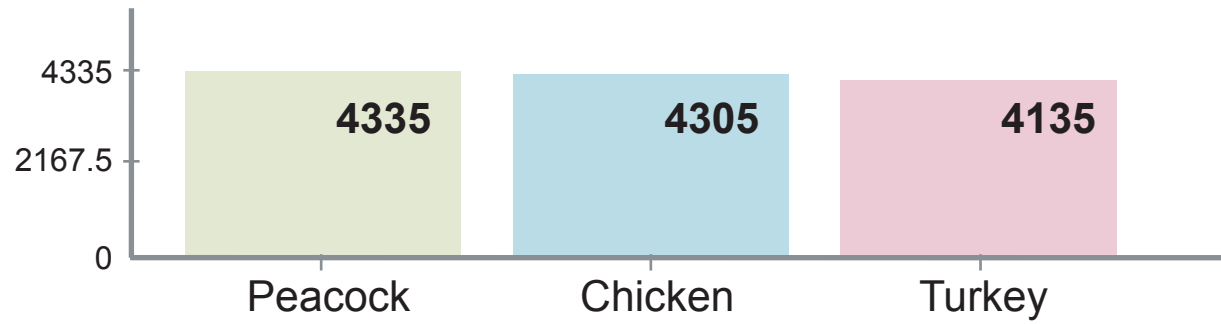

*Number of Pfam domains unique to 1 species or shared between 2 or all 3*

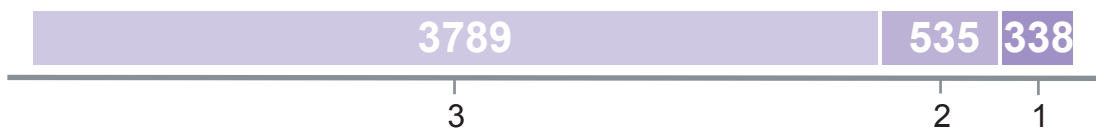

Figure 6

[Click here to access/download;Figure;Fig 6. Peacock scaffolds against Gallus circular synteny.png](#)

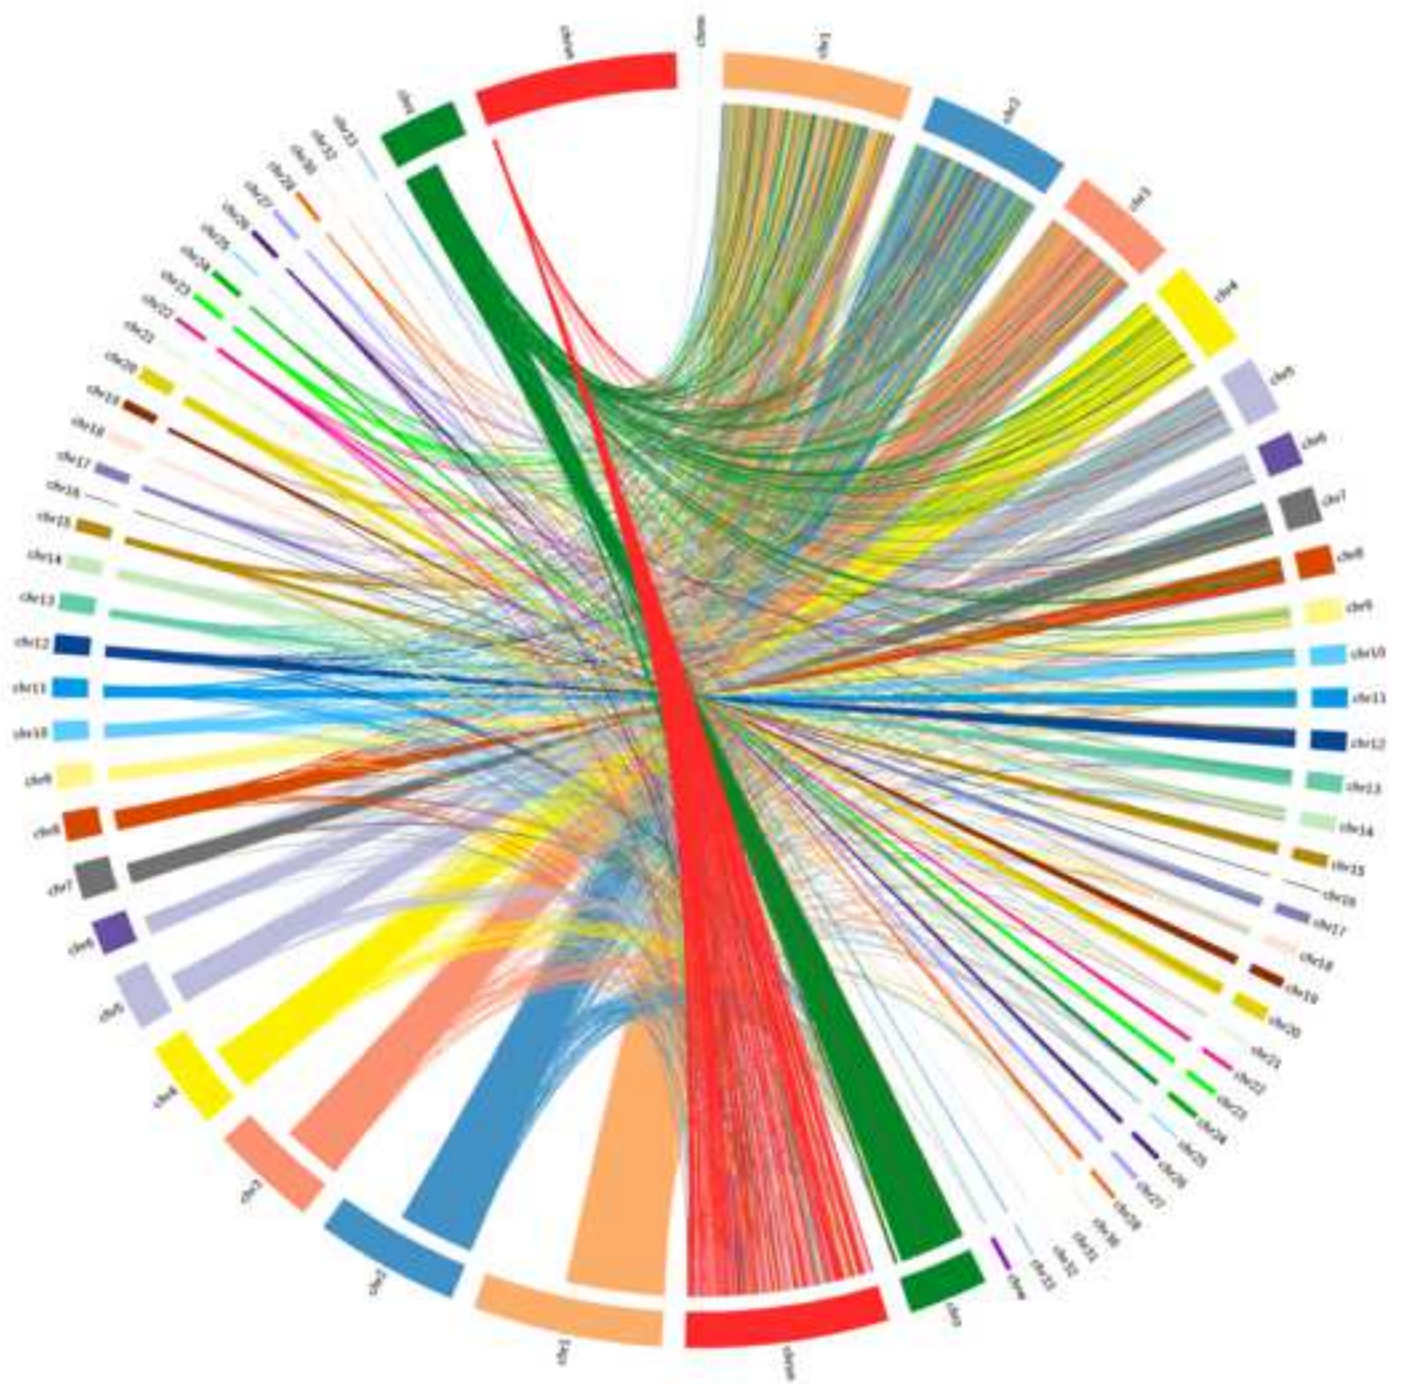

NCBI-NR

GO

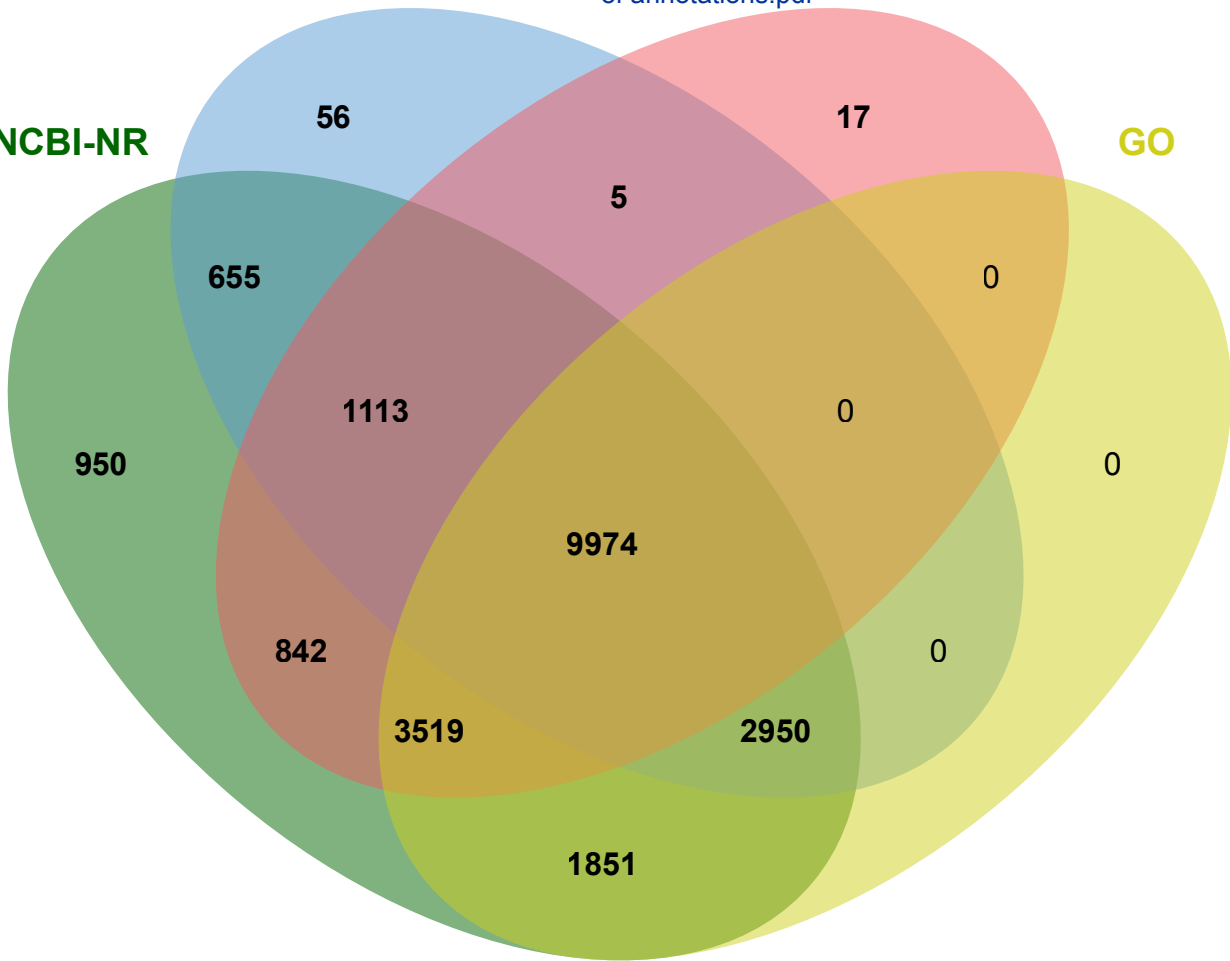

Proteins annotated from different sources

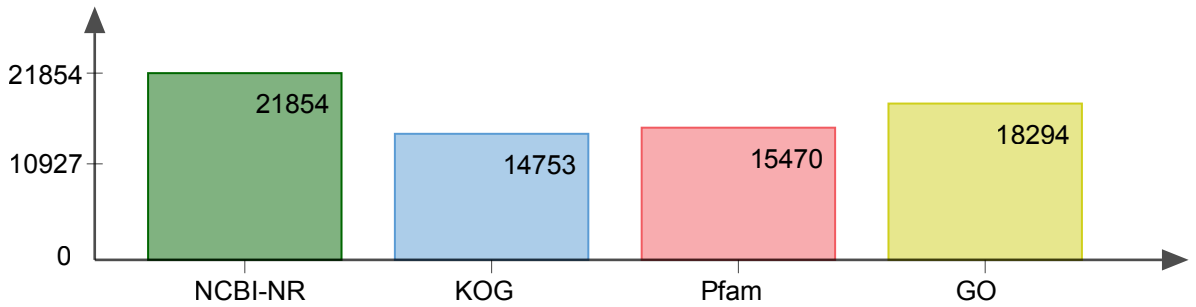

Number of common proteins: specific to 1 or shared by 2, 3, or 4 annotations

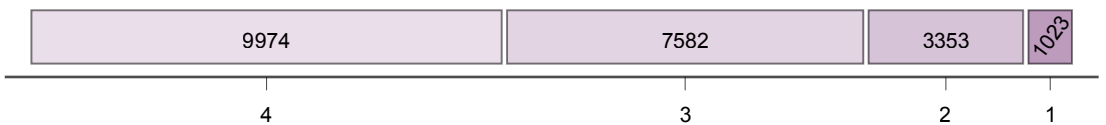

Figure 8

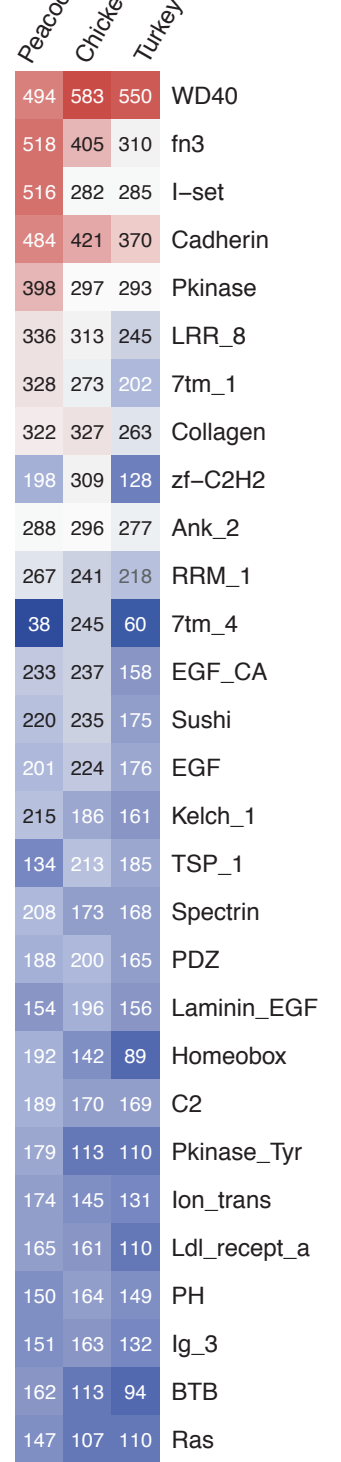

Click here to access/download/figure;Figure8. Heatmap

Figure 8

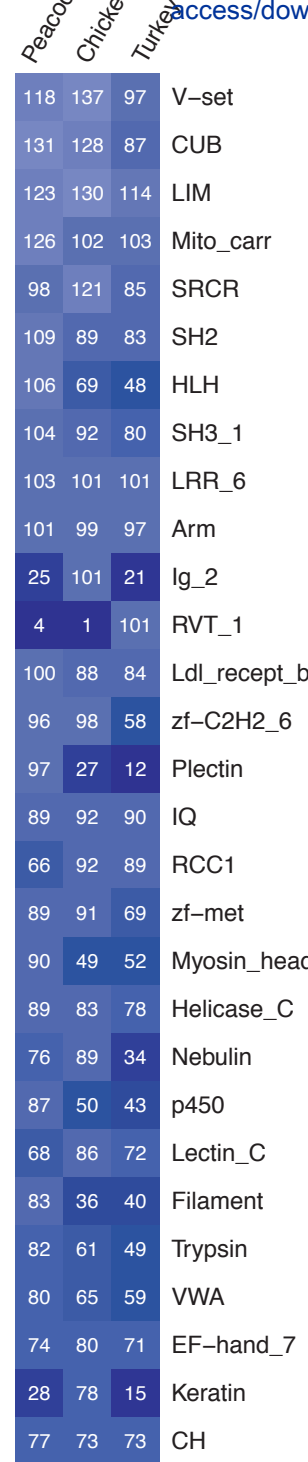

Figure 8

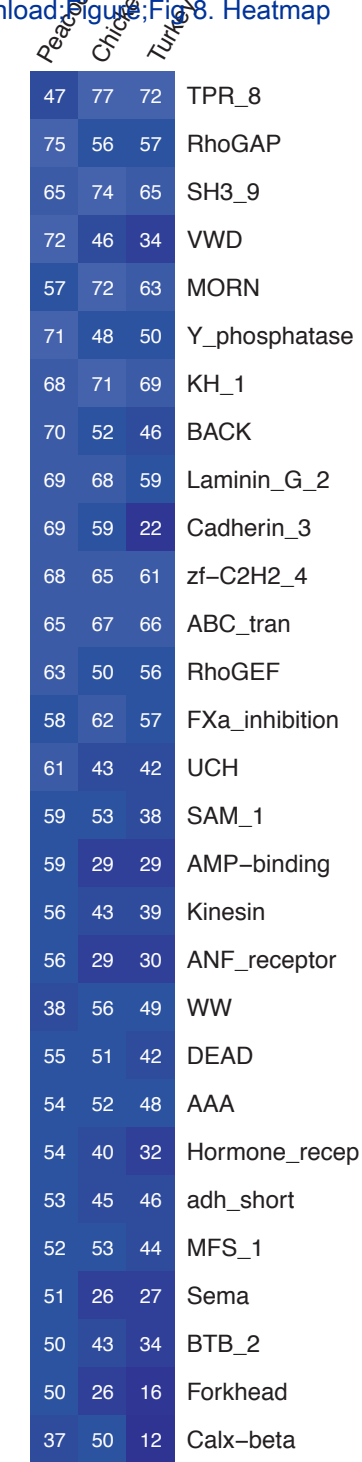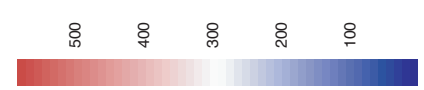



Click here to access/download  
**Supplementary Material**  
Supplementary\_Description of all the tables and  
figures.docx



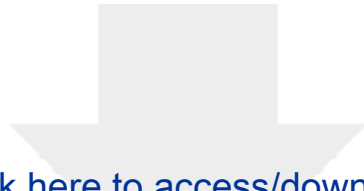

[Click here to access/download](#)

**Supplementary Material**

[Table\\_S1\\_ReadStats\\_Table\\_S2\\_TEs.xlsx](#)

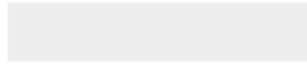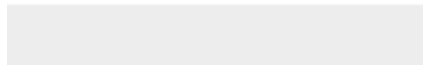



Click here to access/download  
**Supplementary Material**  
Table\_S3\_Repeats.xlsx





[Click here to access/download](#)

**Supplementary Material**

[Table\\_S4\\_Gene\\_annotations\\_of\\_peacock\\_proteins.xlsx](#)





Click here to access/download  
**Supplementary Material**  
Table\_S5\_KEGG\_annotation.xlsx



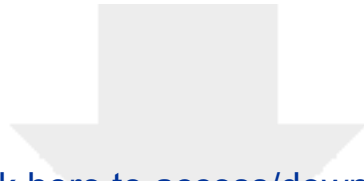

Click here to access/download  
**Supplementary Material**  
Table\_S6\_KOG\_annotation.xlsx

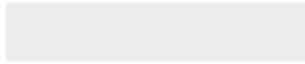

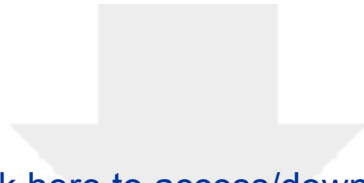

[Click here to access/download](#)

**Supplementary Material**

[Table\\_S7\\_BlastVsHumanProteins.xlsx](#)

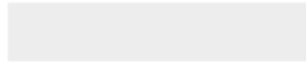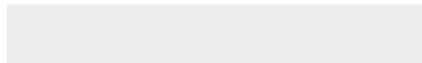



Click here to access/download  
**Supplementary Material**  
Table\_S8\_Orthologous\_proteins





Click here to access/download  
**Supplementary Material**  
Table\_S9\_Pfam\_Analysis.xlsx







[Click here to access/download](#)

**Supplementary Material**

Fig S1. Proteins showing similarity to Pfam domains.pdf



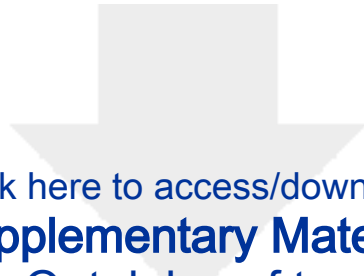

[Click here to access/download](#)

**Supplementary Material**

Fig S2. Gene Ontology of top 10 WGS.png





Click here to access/download  
**Supplementary Material**  
Fig S3.Peacock vs Human\_GO.pdf





Click here to access/download

**Supplementary Material**

Reviewed\_comments\_GigaScience\_Final\_upload\_30Sept2018.docx
